# Supplementary material for: Palladium/norbornene-catalyzed C–H/N–H cycloaddition of carbazoles with 2-halobenzoic acid derivatives
Source: Royal Society of Chemistry journal article supplement (doi:10.1039/d4cc03720k), 2024-01-01
Supplement: d4cc03720k1.pdf [file d4cc03720k1.pdf]

## **Palladium/norbornene-catalyzed C–H/N–H cycloaddition of carbazoles with 2-halobenzoic acid derivatives**

Shilei Liu,<sup>a</sup> Jiang Nan,<sup>\*a</sup> Nan An,<sup>a</sup> Rui Cao,<sup>a</sup> Lanxin Zhu,<sup>a</sup> Qiang Yan,<sup>a</sup> Hanqing Zhang,<sup>a</sup> Chengyuan Liang<sup>b</sup>

<sup>a</sup>Shaanxi Key Laboratory of Chemical Additives for Industry, College of Chemistry and Chemical Engineering, Shaanxi University of Science and Technology, Xi'an 710021, China

<sup>b</sup>Xi'an Key Laboratory of Antiviral and Antimicrobial-Resistant Bacteria Therapeutics Research, School of Food and Biological Engineering, Shaanxi University of Science and Technology, Xi'an 710021, China.

Email: nanjiang@sust.edu.cn

### **Table of Contents:**

|                                                           |    |
|-----------------------------------------------------------|----|
| 1. General information .....                              | 2  |
| 2. General procedure for the synthesis of substrates..... | 2  |
| 3. General procedure for the synthesis of products 3..... | 2  |
| 4. General procedure for further substrate scope .....    | 11 |
| 5. Scale-up reaction and derivatizations .....            | 12 |
| 6. Mechanistic Studies .....                              | 14 |
| 7. Crystallographic data .....                            | 16 |
| 8. NMR and HRMS spectra .....                             | 18 |
| 9. References.....                                        | 58 |

## 1. General information

All reagents were used from commercial received unless otherwise noted. Analytical thin-layer chromatography was performed with 0.25 mm coated commercial silica gel plates (TLC Silica Gel 60 F<sub>254</sub>); visualization of the developed chromatogram was performed by fluorescence. Flash Chromatography was performed with silica gel (300-400 mesh). Proton-1 nuclear magnetic resonance (<sup>1</sup>H NMR) data were acquired at 400 MHz on a Bruker Ascend 400 (400 MHz) spectrometer, and chemical shifts are reported in delta (δ) units, in parts per million (ppm) downfield from tetramethylsilane. Splitting patterns are designated as s, singlet; d, doublet; t, triplet; q, quartet; m, multiplet, coupling constants *J* are quoted in Hz. Carbon-13 nuclear magnetic resonance (<sup>13</sup>C NMR) data were acquired at 100 MHz on a Bruker Ascend 400 spectrometer, chemical shifts are reported in ppm relative to the center line of a triplet at 77.0 ppm for CDCl<sub>3</sub>. High resolution mass spectra (HRMS) were acquired on a Bruker Daltonics MicroTof-Q II mass spectrometer. The Fourier IR data was determined on a VECTOR II spectrometer in Bruker Germany.

## 2. General procedure for the synthesis of substrates

The substrates **1a-d**, **1f**, **1i**, **1l-1m**, **1t** and **1u** were commercially available, and the Others (including **1e**<sup>[1]</sup>, **1k**<sup>[1]</sup>, **1g-h**<sup>[2]</sup> and **1j**<sup>[2]</sup>) were prepared according to the reported procedures.

## 3. General procedure for the synthesis of products 3

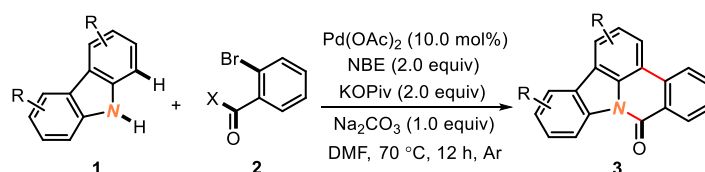

A 15 mL pressure tube was charged with Pd(OAc)<sub>2</sub> (0.02 mmol, 4.5 mg, 0.1 equiv.), KOPiv (0.4 mmol, 56.0 mg, 2.0 equiv.), Na<sub>2</sub>CO<sub>3</sub> (0.2 mmol, 21.2 mg, 1.0 equiv.), NBE (0.4 mmol, 37.6 mg, 2.0 equiv.), **1** (0.2 mmol, 1.0 equiv.), **2** (0.4 mmol, 2.0 equiv.) and DMF (2 mL) under Ar atmosphere. The reaction mixture was stirred at 70 °C for 12 h under Ar atmosphere in an oil bath. After cooling to room temperature, neutralized by a saturated aqueous NaCl solution, and extracted with EtOAc. The organic layers were dried over anhydrous Na<sub>2</sub>SO<sub>4</sub> and concentrated to dryness under reduced pressure. The crude product was purified by silica gel flash chromatography (PE/EA as the eluent) to give the products **3**.

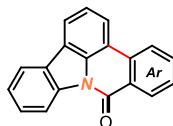

### 8H-indolo[3,2,1-de]phenanthridin-8-one (3a)

White solid (42.1 mg, 78% yield). M.p.: 218-220 °C. PE / EA = 20:1,  $R_f = 0.32$ .  $^1\text{H NMR}$  (400 MHz,  $\text{CDCl}_3 + 10\% \text{CF}_3\text{COOD}$ ):  $\delta$  8.50 (d,  $J = 7.6$  Hz, 1H), 8.35 (d,  $J = 7.3$  Hz, 1H), 7.96 (d,  $J = 7.4$  Hz, 1H), 7.77 (s, 2H), 7.67 (d,  $J = 6.8$  Hz, 2H), 7.50 (dt,  $J = 14.8, 7.1$  Hz, 2H), 7.37 (t,  $J = 6.7$  Hz, 1H), 7.27 (d,  $J = 7.2$  Hz, 1H).  $^{13}\text{C NMR}$  (100 MHz,  $\text{CDCl}_3$ ):  $\delta$  160.8, 138.1, 133.8, 133.4, 133.1, 129.0, 128.5, 128.3, 126.6, 126.4, 125.7, 124.7, 124.5, 122.4, 121.1, 120.8, 120.3, 117.5, 116.8. IR (KBr): 3468, 2924, 1750, 1663, 1599, 1498, 1434, 1343, 1304, 1267, 759,  $\text{cm}^{-1}$ .

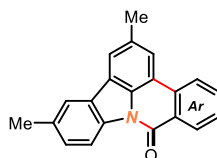

### 2,12-dimethyl-8H-indolo[3,2,1-de]phenanthridin-8-one (3b)

White solid (46.8 mg, 78% yield). M.p.: 266-269 °C. PE / EA = 20:1,  $R_f = 0.32$ .  $^1\text{H NMR}$  (400 MHz,  $\text{CDCl}_3 + 10\% \text{CF}_3\text{COOD}$ ):  $\delta$  8.39 (d,  $J = 8.0$  Hz, 1H), 8.32 (d,  $J = 8.3$  Hz, 1H), 8.06 (d,  $J = 8.0$  Hz, 1H), 7.75 (t,  $J = 7.5$  Hz, 1H), 7.62 (s, 1H), 7.58 (t,  $J = 7.6$  Hz, 1H), 7.52 (s, 1H), 7.49 (s, 1H), 7.26 (t,  $J = 3.9$  Hz, 1H), 2.48 (s, 3H), 2.45 (s, 3H).  $^{13}\text{C NMR}$  (100 MHz,  $\text{CDCl}_3$ ):  $\delta$  161.2, 136.4, 136.2, 135.3, 134.1, 133.7, 131.5, 129.4, 129.1, 128.6, 127.2, 126.2, 125.0, 122.6, 122.1, 121.2, 120.9, 117.4, 116.8, 22.1, 21.7. IR (KBr): 3684, 2921, 2857, 1753, 1667, 1595, 1490, 1453, 1350, 857, 812, 768, 684, 573  $\text{cm}^{-1}$ .

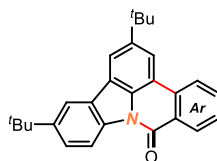

### 2,12-di-tert-butyl-8H-indolo[3,2,1-de]phenanthridin-8-one (3c)

White solid (53.3 mg, 70% yield). M.p.: 212-214 °C. PE / EA = 20:1,  $R_f = 0.32$ .  $^1\text{H NMR}$  (400 MHz,  $\text{CDCl}_3$ ):  $\delta$  8.70 (d,  $J = 8.6$  Hz, 1H), 8.65 (d,  $J = 7.9$  Hz, 1H), 8.33 (d,  $J = 8.0$  Hz, 1H), 8.21 (s, 1H), 8.16 (s, 1H), 8.11 (s, 1H), 7.78 (t,  $J = 7.5$  Hz, 1H), 7.66 (d,  $J = 8.6$  Hz, 1H), 7.60 (t,  $J = 7.6$  Hz, 1H), 1.57 (s, 9H), 1.50 (s, 9H).  $^{13}\text{C NMR}$  (100 MHz,  $\text{CDCl}_3$ ):  $\delta$  159.9, 148.3, 147.7, 136.9, 134.3, 133.0, 132.8, 129.5, 128.2, 128.1, 126.7, 125.7, 124.7, 122.4, 118.4, 117.3, 117.3,

116.9, 116.5, 35.7, 35.3, 32.3, 32.0. IR (KBr): 2954, 2863, 1674, 1489, 1452, 1362, 1274, 872, 824, 765, 685, 631 cm<sup>-1</sup>.

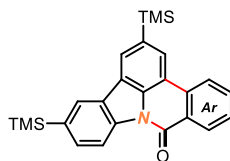

### 2,12-bis(trimethylsilyl)-8H-indolo[3,2,1-de]phenanthridin-8-one (3d)

White solid (57.4 mg, 71% yield). M.p.: 263-270 °C. PE / EA = 20:1, R<sub>f</sub> = 0.32. <sup>1</sup>H NMR (400 MHz, CDCl<sub>3</sub>): δ 8.79 (d, *J* = 8.0 Hz, 1H), 8.64 (d, *J* = 7.9 Hz, 1H), 8.35 (d, *J* = 7.9 Hz, 1H), 8.29 (s, 1H), 8.26 – 8.22 (m, 2H), 7.85 – 7.72 (m, 2H), 7.62 (t, *J* = 7.5 Hz, 1H), 0.48 (s, 9H), 0.43 (s, 9H). <sup>13</sup>C NMR (100 MHz, CDCl<sub>3</sub>): <sup>13</sup>C NMR (101 MHz, CDCl<sub>3</sub>) δ 160.7, 139.8, 137.6, 136.5, 135.6, 134.6, 133.8, 133.6, 130.1, 128.9, 128.5, 126.6, 126.4, 126.3, 125.7, 124.8, 123.0, 117.4, 117.3, 0.0. IR (KBr): 2952, 1677, 1599, 1487, 1357, 1260, 1158, 1108, 841, 763, 689, 621 cm<sup>-1</sup>.

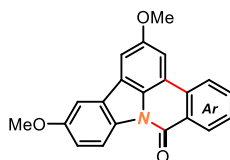

### 2,12-dimethoxy-8H-indolo[3,2,1-de]phenanthridin-8-one (3e)

Yellow solid (39.6 mg, 60% yield). M.p.: 192-195 °C. PE / EA = 5:1, R<sub>f</sub> = 0.32. <sup>1</sup>H NMR (400 MHz, CDCl<sub>3</sub>): δ 8.59 (d, *J* = 7.5, 2.8 Hz, 2H), 8.10 (d, *J* = 7.9 Hz, 1H), 7.74 (t, *J* = 7.5 Hz, 1H), 7.60 (t, *J* = 7.5 Hz, 1H), 7.51 (s, 1H), 7.39 (s, 1H), 7.34 (s, 1H), 7.10 (d, *J* = 8.9 Hz, 1H), 3.95 (s, 3H), 3.93 (s, 3H). <sup>13</sup>C NMR (100 MHz, CDCl<sub>3</sub>): δ 159.2, 157.6, 157.6, 133.6, 133.5, 132.7, 129.8, 129.4, 128.5, 128.4, 127.7, 125.2, 122.6, 118.2, 117.7, 115.5, 106.8, 106.8, 104.9, 56.5, 56.1. IR (KBr): 2924, 1695, 1599, 1499, 1464, 1422, 1367, 1327, 1263, 1199, 1163, 826, 774, 690 cm<sup>-1</sup>.

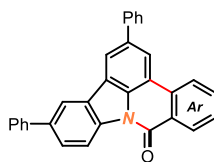

### 2,12-diphenyl-8H-indolo[3,2,1-de]phenanthridin-8-one (3f)

White solid (56.3 mg, 67% yield). M.p.: 215-220 °C. PE / EA = 20:1, R<sub>f</sub> = 0.32. <sup>1</sup>H NMR (400 MHz, CDCl<sub>3</sub> + 10% CF<sub>3</sub>COOD): δ 8.37 (d, *J* = 8.4 Hz, 1H), 8.28 (d, *J* = 7.9 Hz, 1H), 7.99 (d, *J* = 7.9 Hz, 1H), 7.92 (s, 1H), 7.87 (s, 2H), 7.62 (t, *J* = 7.3 Hz, 1H), 7.56 (t, *J* = 8.3 Hz, 5H), 7.45 (dq, *J* = 19.5, 6.1, 5.6 Hz, 7H). <sup>13</sup>C NMR (100 MHz, CDCl<sub>3</sub>): δ 160.4, 140.8, 140.6, 138.8,

138.5, 137.5, 133.6, 133.4, 132.9, 129.2, 129.2, 129.1, 128.7, 127.8, 127.7, 127.6, 127.5, 127.4, 127.1, 126.5, 124.9, 122.4, 120.0, 119.4, 119.1, 117.6, 117.0. IR (KBr): 2923, 2856, 1674, 1597, 1474, 1361, 1273, 1200, 1137, 830, 740, 693  $\text{cm}^{-1}$ .

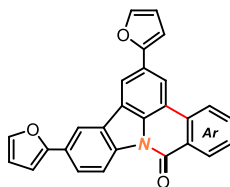

**2,12-di(furan-2-yl)-8H-indolo[3,2,1-de]phenanthridin-8-one (3g)**

Yellow solid (48.0 mg, 60% yield). M.p.: 259-264 °C. PE / EA = 5:1,  $R_f = 0.32$ .  $^1\text{H}$  NMR (400 MHz,  $\text{CDCl}_3 + 10\% \text{CF}_3\text{COOD}$ ):  $\delta$  8.34 (d,  $J = 8.0$  Hz, 2H), 8.03 (d,  $J = 7.9$  Hz, 1H), 7.82 (s, 1H), 7.76 (s, 1H), 7.71 (d,  $J = 7.8$  Hz, 4H), 7.55 (d,  $J = 7.0$  Hz, 3H), 7.45 (d,  $J = 8.4$  Hz, 1H), 6.78 – 6.68 (m, 2H).  $^{13}\text{C}$  NMR (100 MHz,  $\text{CDCl}_3$ ):  $\delta$  160.5, 144.2, 144.1, 144.1, 144.1, 139.0, 138.9, 137.3, 133.7, 133.5, 132.8, 130.4, 129.9, 129.4, 128.8, 127.0, 126.8, 126.5, 126.4, 126.3, 126.2, 125.0, 122.5, 118.6, 118.0, 117.8, 117.3, 109.2, 109.1. IR (KBr): 3452, 2925, 2859, 1777, 1668, 1498, 1361, 1281, 1156, 1047, 870, 773, 590,  $\text{cm}^{-1}$ .

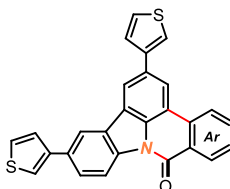

**2,12-di(thiophen-3-yl)-8H-indolo[3,2,1-de]phenanthridin-8-one (3h)**

Yellow solid (53.3 mg, 62% yield). M.p.: 258-262 °C. PE / EA = 5:1,  $R_f = 0.32$ .  $^1\text{H}$  NMR (400 MHz,  $\text{CDCl}_3 + 10\% \text{CF}_3\text{COOD}$ ):  $\delta$  8.35 (d,  $J = 7.3$  Hz, 2H), 8.04 (d,  $J = 7.6$  Hz, 1H), 7.97 (s, 1H), 7.87 (s, 2H), 7.72 (t,  $J = 7.4$  Hz, 1H), 7.61 (d,  $J = 8.2$  Hz, 1H), 7.55 (t,  $J = 7.4$  Hz, 1H), 7.36 (dd,  $J = 12.9, 5.1$  Hz, 3H), 7.30 (s, 1H), 7.15 (dd,  $J = 11.1, 3.8$  Hz, 2H).  $^{13}\text{C}$  NMR (100 MHz,  $\text{CDCl}_3$ ):  $\delta$  159.5, 144.1, 144.0, 137.6, 133.7, 133.6, 133.2, 132.6, 132.1, 129.5, 129.0, 128.5, 128.4, 128.3, 128.3, 127.1, 126.8, 126.6, 125.4, 125.4, 125.1, 123.9, 123.8, 122.7, 118.9, 118.4, 118.0, 117.9, 117.4. IR (KBr): 3064, 2953, 2868, 1673, 1591, 1483, 1452, 1411, 1348, 1326, 1276, 1209, 1144, 861, 807, 760, 684, 549  $\text{cm}^{-1}$ .

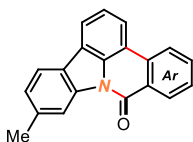

### 11-methyl-8H-indolo[3,2,1-de]phenanthridin-8-one (3i)

White solid (35.3 mg, 63% yield). M.p.: 181-183 °C. PE / EA = 20:1,  $R_f$  = 0.32.  $^1\text{H}$  NMR (400 MHz,  $\text{CDCl}_3$ ):  $\delta$  8.59 (d,  $J$  = 8.0 Hz, 1H), 8.56 (s, 1H), 8.21 – 8.13 (m, 1H), 7.97 (d,  $J$  = 7.8 Hz, 1H), 7.86 (d,  $J$  = 7.6 Hz, 1H), 7.81 (d,  $J$  = 7.9 Hz, 1H), 7.74 (t,  $J$  = 7.6 Hz, 1H), 7.59 (t,  $J$  = 7.6 Hz, 1H), 7.43 (t,  $J$  = 7.7 Hz, 1H), 7.22 (d,  $J$  = 7.8 Hz, 1H), 2.56 (s, 3H).  $^{13}\text{C}$  NMR (100 MHz,  $\text{CDCl}_3$ ):  $\delta$  156.7, 136.4, 136.1, 131.9, 131.6, 130.7, 127.2, 126.2, 125.7, 124.2, 122.7, 122.2, 122.2, 120.6, 118.9, 118.7, 118.0, 116.1, 115.5, 24.6. IR (KBr): 3481, 2925, 2855, 1668, 1503, 1420, 1344, 1294, 872, 821, 796, 752, 693  $\text{cm}^{-1}$ .

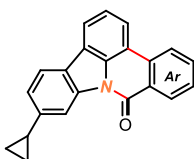

### 11-cyclopropyl-8H-indolo[3,2,1-de]phenanthridin-8-one (3j)

White solid (36.0 mg, 60% yield). M.p.: 172-177 °C. PE / EA = 20:1,  $R_f$  = 0.32.  $^1\text{H}$  NMR (400 MHz,  $\text{CDCl}_3$ ):  $\delta$  8.57 (d,  $J$  = 7.9 Hz, 1H), 8.45 (s, 1H), 8.15 (d,  $J$  = 7.9 Hz, 1H), 7.94 (d,  $J$  = 7.8 Hz, 1H), 7.84 (d,  $J$  = 7.5 Hz, 1H), 7.79 (d,  $J$  = 8.0 Hz, 1H), 7.73 (t,  $J$  = 7.6 Hz, 1H), 7.58 (t,  $J$  = 7.6 Hz, 1H), 7.41 (t,  $J$  = 7.6 Hz, 1H), 7.16 (d,  $J$  = 8.0 Hz, 1H), 2.17 – 2.06 (m, 1H), 1.10 (q,  $J$  = 5.3 Hz, 2H), 0.89 (q,  $J$  = 5.0 Hz, 2H).  $^{13}\text{C}$  NMR (100 MHz,  $\text{CDCl}_3$ ):  $\delta$  159.8, 144.8, 138.8, 133.9, 133.6, 132.6, 129.0, 128.0, 127.5, 124.3, 123.8, 123.8, 122.9, 122.2, 120.3, 120.2, 119.4, 116.7, 113.8, 16.2, 10.0. IR (KBr): 3462, 2923, 1678, 1606, 1502, 1423, 1344, 1276, 1148, 1032, 967, 803, 749, 689  $\text{cm}^{-1}$ .

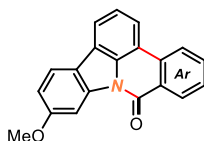

### 11-methoxy-8H-indolo[3,2,1-de]phenanthridin-8-one (3k)

White solid (40.8 mg, 68% yield). M.p.: 165-172 °C. PE / EA = 10:1,  $R_f$  = 0.32.  $^1\text{H}$  NMR (400 MHz,  $\text{CDCl}_3$ ):  $\delta$  8.51 (d,  $J$  = 6.7 Hz, 1H), 8.23 (s, 1H), 8.09 (d,  $J$  = 8.0 Hz, 1H), 7.82 (d,  $J$  = 7.8 Hz, 1H), 7.74 – 7.65 (m, 3H), 7.58 – 7.50 (m, 1H), 7.33 (t,  $J$  = 7.7 Hz, 1H), 6.94 (d,  $J$  = 6.2 Hz, 1H), 3.94 (s, 3H).  $^{13}\text{C}$  NMR (100 MHz,  $\text{CDCl}_3$ ):  $\delta$  160.3, 160.1, 139.8, 134.0, 133.9, 132.9, 129.2, 128.2, 127.6, 124.4, 124.1, 122.4, 121.3, 120.0, 119.6, 118.8, 116.8, 113.6, 101.3, 56.0. IR (KBr): 3466, 2924, 1668, 1660, 1501, 1466, 1427, 1345, 1272, 1166, 1074, 854, 751, 691  $\text{cm}^{-1}$ .

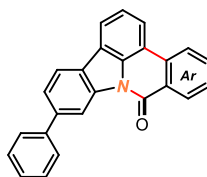

### 11-phenyl-8H-indolo[3,2,1-de]phenanthridin-8-one (3l)

White solid (33.3 mg, 49% yield). M.p.: 187-190 °C. PE / EA = 10:1,  $R_f = 0.32$ .  $^1\text{H NMR}$  (400 MHz,  $\text{CDCl}_3 + 10\% \text{CF}_3\text{COOD}$ ):  $\delta$  8.71 (s, 1H), 8.38 (d,  $J = 7.7$  Hz, 1H), 8.03 (d,  $J = 7.8$  Hz, 1H), 7.81 (d,  $J = 7.7$  Hz, 1H), 7.76 (d,  $J = 8.0$  Hz, 1H), 7.71 (d,  $J = 7.1$  Hz, 4H), 7.59 (d,  $J = 8.0$  Hz, 1H), 7.52 (q,  $J = 7.4$  Hz, 3H), 7.42 (t,  $J = 7.3$  Hz, 1H), 7.33 (d,  $J = 7.6$  Hz, 1H).  $^{13}\text{C NMR}$  (100 MHz,  $\text{CDCl}_3$ ):  $\delta$  160.4, 140.8, 139.7, 138.0, 133.2, 132.8, 132.8, 128.3, 128.2, 127.8, 127.1, 126.6, 125.5, 124.9, 124.2, 124.0, 123.7, 121.7, 120.3, 120.1, 119.5, 116.3, 115.0. IR (KBr): 3435, 2949, 1669, 1602, 1418, 1341, 1286, 889, 747, 693, 639  $\text{cm}^{-1}$ .

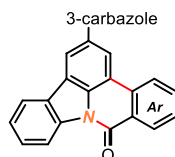

### 2-(9H-carbazol-3-yl)-8H-indolo[3,2,1-de]phenanthridin-8-one (3m)

White solid (29.5 mg, 34% yield). M.p.: 242-247 °C. PE / EA = 2:1,  $R_f = 0.30$ .  $^1\text{H NMR}$  (400 MHz,  $\text{CDCl}_3 + 10\% \text{CF}_3\text{COOD}$ ):  $\delta$  8.83 (d,  $J = 8.1$  Hz, 1H), 8.71 (d,  $J = 7.8$  Hz, 1H), 8.53 (d,  $J = 8.1$  Hz, 2H), 8.42 (d,  $J = 10.6$  Hz, 2H), 8.19 (dd,  $J = 14.8, 5.9$  Hz, 2H), 7.95 (t,  $J = 7.5$  Hz, 1H), 7.83 (d,  $J = 6.8$  Hz, 1H), 7.77 (t,  $J = 7.5$  Hz, 1H), 7.68 (t,  $J = 7.7$  Hz, 1H), 7.59 (t,  $J = 7.2$  Hz, 2H), 7.52 (s, 2H), 7.35 – 7.30 (m, 1H).  $^{13}\text{C NMR}$  (100 MHz,  $\text{CDCl}_3$ ):  $\delta$  159.9, 140.3, 140.1, 139.1, 138.8, 134.4, 133.7, 133.0, 129.5, 128.8, 128.6, 127.2, 126.9, 126.3, 126.0, 125.9, 125.6, 124.2, 123.4, 122.9, 122.8, 121.1, 120.8, 120.4, 120.0, 119.4, 118.6, 117.8, 117.5, 111.0, 110.1. IR (KBr): 3321, 2975, 2854, 1747, 1665, 1602, 1454, 1423, 1424, 1353, 1237, 1127, 772, 727, 589, 512  $\text{cm}^{-1}$ .

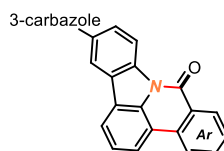

### 2-(9H-carbazol-3-yl)-8H-indolo[3,2,1-de]phenanthridin-8-one (3m')

White solid (38.7 mg, 45% yield). M.p.: 256-258 °C. PE / EA = 2:1,  $R_f = 0.32$ .  $^1\text{H NMR}$  (400 MHz,  $\text{CDCl}_3 + 10\% \text{CF}_3\text{COOD}$ ):  $\delta$  8.63 (d,  $J = 7.2$  Hz, 1H), 8.51 (d,  $J = 7.1$  Hz, 1H), 8.21 (s, 2H),

8.12 – 7.99 (m, 4H), 7.86 – 7.76 (m, 2H), 7.65 (s, 2H), 7.59 (s, 1H), 7.40 (s, 3H), 7.25 (s, 2H). <sup>13</sup>C NMR (100 MHz, CDCl<sub>3</sub>): δ 161.9, 140.8, 140.4, 139.5, 137.3, 134.6, 134.1, 132.6, 129.5, 129.0, 128.1, 128.0, 126.4, 126.3, 125.8, 125.7, 125.5, 124.4, 123.8, 123.0, 121.8, 121.0, 120.7, 120.6, 120.0, 119.7, 119.2, 118.1, 117.8, 111.2, 111.0. IR (KBr): 3361, 2950, 2925, 1660, 1591, 1448, 1341, 1275, 1240, 1140, 874, 801, 747, 592 cm<sup>-1</sup>.

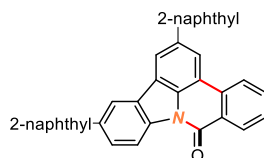

### 2,12-di(naphthalen-2-yl)-8H-indolo[3,2,1-de]phenanthridin-8-one (3t)

White solid (52.0 mg, 50% yield). M.p.: 255-257 °C. PE / EA = 10:1, R<sub>f</sub> = 0.32. <sup>1</sup>H NMR (400 MHz, CDCl<sub>3</sub> + 10% CF<sub>3</sub>COOD): δ 8.24 (d, *J* = 8.3 Hz, 1H), 8.14 (d, *J* = 7.8 Hz, 1H), 7.91 (d, *J* = 7.8 Hz, 1H), 7.88 (s, 1H), 7.83 – 7.69 (m, 9H), 7.64 (d, *J* = 7.2 Hz, 1H), 7.56 (t, *J* = 7.8 Hz, 2H), 7.45 (p, *J* = 7.0 Hz, 6H), 7.36 (t, *J* = 7.4 Hz, 1H). <sup>13</sup>C NMR (100 MHz, CDCl<sub>3</sub>): δ 160.5, 138.6, 138.3, 137.7, 137.4, 137.3, 133.8, 133.8, 133.6, 133.5, 132.8, 132.6, 129.1, 128.8, 128.7, 128.6, 128.4, 128.4, 127.8, 127.8, 127.6, 127.1, 126.7, 126.5, 126.4, 126.3, 126.1, 126.0, 125.8, 125.5, 125.3, 125.0, 122.4, 120.0, 119.4, 119.0, 117.7, 116.9. IR (KBr): 3048, 1667, 1599, 1486, 1439, 1355, 1275, 1138, 855, 808, 738, 681, 607, 466 cm<sup>-1</sup>.

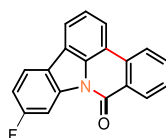

### 11-fluoro-8H-indolo[3,2,1-de]phenanthridin-8-one (3u)

White solid (25.7 mg, 46% yield). M.p.: 244-246 °C. PE / EA = 50:1, R<sub>f</sub> = 0.32. <sup>1</sup>H NMR (400 MHz, CDCl<sub>3</sub> + 10% CF<sub>3</sub>COOD): δ 8.45 (d, *J* = 8.0 Hz, 1H), 8.28 (d, *J* = 11.2 Hz, 1H), 8.16 (d, *J* = 8.0 Hz, 1H), 7.94 (d, *J* = 7.8 Hz, 1H), 7.81 (dd, *J* = 10.1, 2.8 Hz, 3H), 7.62 (t, *J* = 7.5 Hz, 1H), 7.44 (t, *J* = 7.7 Hz, 1H), 7.14 (t, *J* = 8.7 Hz, 1H). <sup>13</sup>C NMR (100 MHz, CDCl<sub>3</sub>): δ 162.8 (d = 244.9 Hz), 161.2, 138.8 (d = 12.7 Hz), 134.1, 134.0, 133.8, 129.4, 128.9, 126.3, 125.2, 124.1, 123.0, 122.8, 121.9 (d = 9.8 Hz), 121.1, 120.2, 117.2, 113.4 (d = 23.8 Hz), 105.6 (d = 28.4 Hz). <sup>19</sup>F NMR (376 MHz, CDCl<sub>3</sub>) δ -111.5. IR (KBr): 3675, 2954, 1677, 1602, 1427, 1348, 1293, 1254, 853, 802, 745, 690, 551 cm<sup>-1</sup>.



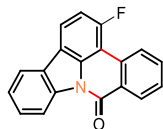

### 3-fluoro-8H-indolo[3,2,1-de]phenanthridin-8-one (3u')

White solid (16.8 mg, 30% yield). M.p.: 220-224 °C. PE / EA = 50:1,  $R_f$  = 0.28.  $^1\text{H}$  NMR (400 MHz,  $\text{CDCl}_3$ ):  $\delta$  8.76 (d,  $J$  = 8.1 Hz, 1H), 8.67 (d,  $J$  = 7.8 Hz, 1H), 8.58 (d,  $J$  = 8.0 Hz, 1H), 7.95 (d,  $J$  = 7.6 Hz, 1H), 7.90 (dd,  $J$  = 8.1, 4.2 Hz, 1H), 7.81 (t,  $J$  = 7.5 Hz, 1H), 7.66 (t,  $J$  = 7.5 Hz, 1H), 7.55 (t,  $J$  = 7.6 Hz, 1H), 7.45 (t,  $J$  = 7.4 Hz, 1H), 7.25 – 7.17 (m, 1H).  $^{13}\text{C}$  NMR (100 MHz,  $\text{CDCl}_3$ ):  $\delta$  159.9, 159.6 (d = 251.8 Hz), 139.5 (d = 1.5 Hz), 135.2 (d = 9.4 Hz), 133.7, 131.7 (d = 4.2 Hz), 129.5, 128.7, 127.7, 127.3 (d = 16.7 Hz), 126.0, 125.3, 121.4 (d = 10.6 Hz), 120.7 (d = 2.5 Hz), 120.4, 117.5, 112.5, 112.2, 106.5 (d = 15 Hz).  $^{19}\text{F}$  NMR (376 MHz,  $\text{CDCl}_3$ )  $\delta$  -114.2. IR (KBr): 3053, 2923, 1677, 1611, 1503, 1459, 1365, 1336, 1308, 1203, 1097, 813, 745, 692, 588  $\text{cm}^{-1}$ .

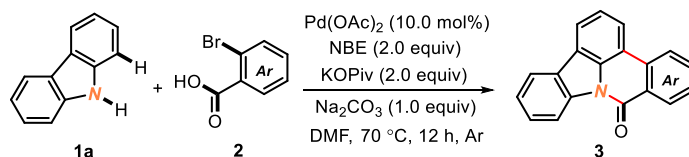

A 15 mL pressure tube was charged with  $\text{Pd}(\text{OAc})_2$  (0.02 mmol, 4.5 mg, 0.1 equiv.), KOPIV (0.4 mmol, 56.0 mg, 2.0 equiv.),  $\text{Na}_2\text{CO}_3$  (0.2 mmol, 21.2 mg, 1.0 equiv.), NBE (0.4 mmol, 37.6 mg, 2.0 equiv.), **1a** (0.2 mmol, 33.4 mg, 1.0 equiv.), **2** (0.4 mmol, 2.0 equiv.) and DMF (2 mL) under Ar atmosphere. The reaction mixture was stirred at 70 °C for 12 h under Ar atmosphere in an oil bath. After cooling to room temperature, neutralized by a saturated aqueous NaCl solution, and extracted with EtOAc. The organic layers were dried over anhydrous  $\text{Na}_2\text{SO}_4$  and concentrated to dryness under reduced pressure. The crude product was purified by silica gel flash chromatography (PE/EA as the eluent) to give the products **3**.

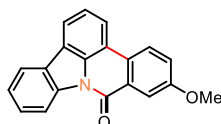

### 6-methoxy-8H-indolo[3,2,1-de]phenanthridin-8-one (3n)

White solid (43.2 mg, 72% yield). M.p.: 170-176 °C. PE / EA = 10:1,  $R_f$  = 0.32.  $^1\text{H}$  NMR (400 MHz,  $\text{CDCl}_3$ ):  $\delta$  8.60 (d,  $J$  = 8.0 Hz, 1H), 7.78 (t,  $J$  = 11.1 Hz, 3H), 7.62 (t,  $J$  = 8.8 Hz, 2H),

7.47 (t,  $J = 7.6$  Hz, 1H), 7.34 (t,  $J = 7.4$  Hz, 1H), 7.20 (t,  $J = 7.3$  Hz, 1H), 7.07 (d,  $J = 8.4$  Hz, 1H), 3.87 (d,  $J = 2.2$  Hz, 3H).  $^{13}\text{C}$  NMR (100 MHz,  $\text{CDCl}_3$ ):  $\delta$  159.7, 159.4, 138.5, 133.1, 128.9, 127.8, 126.9, 126.6, 124.8, 124.0, 123.8, 123.7, 121.7, 120.6, 119.7, 119.4, 117.2, 116.9, 110.3, 55.7. IR (KBr): 3464, 2854, 1671, 1600, 1510, 1441, 1343, 1270, 1115, 1031, 830, 743, 567, 554  $\text{cm}^{-1}$ .

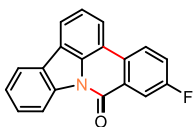

### 6-fluoro-8H-indolo[3,2,1-de]phenanthridin-8-one (3o)

White solid (39.0 mg, 68% yield). M.p.: 230-235  $^{\circ}\text{C}$ . PE / EA = 20:1,  $R_f = 0.32$ .  $^1\text{H}$  NMR (400 MHz,  $\text{CDCl}_3 + 10\% \text{CF}_3\text{COOD}$ ):  $\delta$  8.42 (d,  $J = 8.0$  Hz, 1H), 7.94 (dt,  $J = 10.1, 5.9$  Hz, 2H), 7.78 (d,  $J = 7.6$  Hz, 1H), 7.70 (t,  $J = 7.9$  Hz, 2H), 7.47 (t,  $J = 7.6$  Hz, 1H), 7.43 – 7.28 (m, 3H).  $^{13}\text{C}$  NMR (100 MHz,  $\text{CDCl}_3$ ):  $\delta$  161.8 (d = 248.8 Hz), 159.8, 137.9, 132.6, 130.2 (d = 2.4 Hz), 128.5, 128.3 (d = 7.6 Hz), 126.8, 126.1, 125.2, 124.8 (d = 8.0 Hz), 124.7, 121.9, 121.6, 121.1, 121.0, 120.2, 117.6, 116.3.  $^{19}\text{F}$  NMR (376 MHz,  $\text{CDCl}_3$ )  $\delta$  -111.3. IR (KBr): 3453, 2924, 1670, 1611, 1512, 1445, 1361, 1241, 1122, 827, 745, 554  $\text{cm}^{-1}$ .

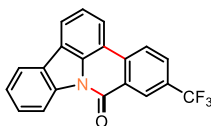

### 6-(trifluoromethyl)-8H-indolo[3,2,1-de]phenanthridin-8-one (3p)

White solid (42.9 mg, 65% yield). M.p.: 233-236  $^{\circ}\text{C}$ . PE / EA = 20:1,  $R_f = 0.32$ .  $^1\text{H}$  NMR (400 MHz,  $\text{CDCl}_3 + 10\% \text{CF}_3\text{COOD}$ ):  $\delta$  8.64 (s, 1H), 8.49 (d,  $J = 8.1$  Hz, 1H), 8.14 (d,  $J = 8.3$  Hz, 1H), 7.87 (dt,  $J = 21.0, 7.4$  Hz, 4H), 7.52 (t,  $J = 7.7$  Hz, 1H), 7.43 (q,  $J = 7.4$  Hz, 2H).  $^{13}\text{C}$  NMR (100 MHz,  $\text{CDCl}_3$ ):  $\delta$  159.8, 138.0, 136.6, 133.7, 130.7 (q = 33.6 Hz), 129.7, 129.7, 128.8, 126.8, 126.7 (q = 4.1 Hz), 126.5, 126.2, 125.3, 124.9, 123.4, 122.5, 121.1, 121.0, 117.6, 115.9.  $^{19}\text{F}$  NMR (376 MHz,  $\text{CDCl}_3$ )  $\delta$  -62.6. IR (KBr): 3023, 2854, 1715, 1663, 1639, 1514, 1444, 1345, 749, 550  $\text{cm}^{-1}$ .

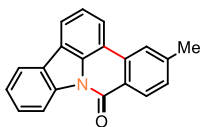

### 5-methyl-8H-indolo[3,2,1-de]phenanthridin-8-one (3q)

White solid (40.3 mg, 72% yield). M.p.: 188-190 °C. PE / EA = 20:1,  $R_f$  = 0.32.  $^1\text{H}$  NMR (400 MHz,  $\text{CDCl}_3$ ):  $\delta$  8.74 (d,  $J$  = 8.1 Hz, 1H), 8.41 (d,  $J$  = 8.1 Hz, 1H), 7.93 (t,  $J$  = 8.5 Hz, 2H), 7.87 (d,  $J$  = 6.8 Hz, 2H), 7.55 (t,  $J$  = 7.7 Hz, 1H), 7.41 (q,  $J$  = 8.0 Hz, 2H), 7.33 (d,  $J$  = 8.1 Hz, 1H), 2.49 (s, 3H).  $^{13}\text{C}$  NMR (100 MHz,  $\text{CDCl}_3$ ):  $\delta$  160.2, 143.8, 138.8, 134.5, 133.9, 129.8, 129.4, 128.2, 126.6, 125.6, 125.0, 124.5, 124.1, 122.8, 121.0, 120.9, 120.3, 117.5, 117.3, 22.4. IR (KBr): 3029, 2950, 1671, 1608, 1506, 1442, 1334, 1255, 1169, 1116, 834, 752  $\text{cm}^{-1}$ .

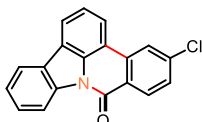

#### 5-chloro-8H-indolo[3,2,1-de]phenanthridin-8-one (3r)

White solid (37.8 mg, 63% yield). M.p.: 241-245 °C. PE / EA = 20:1,  $R_f$  = 0.32.  $^1\text{H}$  NMR (400 MHz,  $\text{CDCl}_3$  + 10%  $\text{CF}_3\text{COOD}$ ):  $\delta$  8.36 (d,  $J$  = 6.6 Hz, 1H), 8.18 (d,  $J$  = 8.9 Hz, 1H), 7.76 (s, 1H), 7.71 (d,  $J$  = 8.9 Hz, 1H), 7.62 (d,  $J$  = 23.2 Hz, 2H), 7.48 – 7.40 (m, 1H), 7.34 (t,  $J$  = 7.5 Hz, 2H), 7.24 (s, 1H).  $^{13}\text{C}$  NMR (100 MHz,  $\text{CDCl}_3$ ):  $\delta$  160.1, 140.7, 140.7, 138.1, 135.2, 133.5, 130.7, 129.0, 128.6, 126.6, 126.0, 125.0, 124.8, 122.4, 121.8, 120.9, 120.4, 117.6, 115.9. IR (KBr): 3430, 3050, 2963, 1668, 1595, 1503, 1441, 1342, 1298, 1264, 1124, 888, 831, 743  $\text{cm}^{-1}$ .

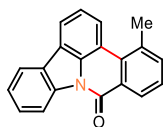

#### 8H-indolo[3,2,1-de]phenanthridin-8-one (3s)

White solid (29.1 mg, 52% yield). M.p.: 195-200 °C. PE / EA = 20:1,  $R_f$  = 0.32.  $^1\text{H}$  NMR (400 MHz,  $\text{CDCl}_3$ ):  $\delta$  8.70 (d,  $J$  = 8.1 Hz, 1H), 8.48 (d,  $J$  = 8.8 Hz, 1H), 8.09 (d,  $J$  = 8.1 Hz, 1H), 7.87 (d,  $J$  = 7.6 Hz, 1H), 7.75 (d,  $J$  = 7.5 Hz, 1H), 7.53 (t,  $J$  = 7.7 Hz, 1H), 7.45 – 7.35 (m, 3H), 7.29 (t,  $J$  = 7.8 Hz, 1H), 2.75 (s, 3H).  $^{13}\text{C}$  NMR (100 MHz,  $\text{CDCl}_3$ ):  $\delta$  159.9, 137.9, 136.9, 135.9, 134.1, 132.4, 128.9, 127.8, 127.7, 127.4, 126.4, 125.0, 124.7, 124.3, 123.4, 120.2, 120.1, 118.6, 117.3, 25.3. IR (KBr): 3429, 2924, 2854, 1692, 1604, 1501, 1438, 1440, 1367, 1267, 745  $\text{cm}^{-1}$ .

#### 4. General procedure for further substrate scope

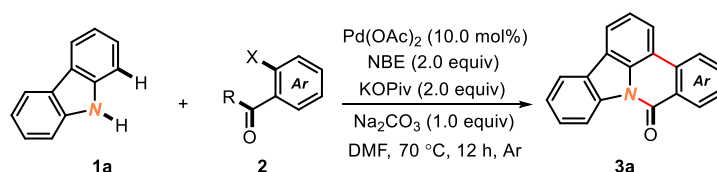

A 15 mL pressure tube was charged with Pd(OAc)<sub>2</sub> (0.02 mmol, 4.5 mg, 0.1 equiv.), KOPiv (0.4 mmol, 56.0 mg, 2.0 equiv.), Na<sub>2</sub>CO<sub>3</sub> (0.2 mmol, 21.2 mg, 1.0 equiv.), NBE (0.4 mmol, 37.6 mg, 2.0 equiv.), **1a** (0.2 mmol, 33.4 mg, 1.0 equiv.), **2** (0.4 mmol, 2.0 equiv.) and DMF (2 mL) under Ar atmosphere. The reaction mixture was stirred at 70 °C for 12 h under nitrogen atmosphere in an oil bath. After cooling to room temperature, neutralized by a saturated aqueous NaCl solution, and extracted with EtOAc. The organic layers were dried over anhydrous Na<sub>2</sub>SO<sub>4</sub> and concentrated to dryness under reduced pressure. The crude product was purified by silica gel flash chromatography (PE/EA as the eluent) to give the products **3a**.

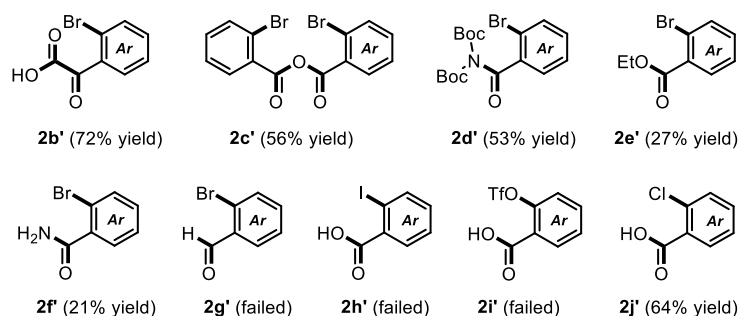

## 5. Scale-up reaction and derivatizations

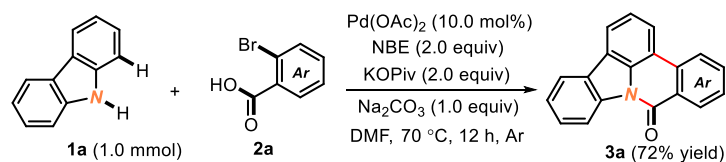

A 75 mL pressure tube was charged with Pd(OAc)<sub>2</sub> (0.1 mmol, 22.5 mg, 0.1 equiv.), KOPiv (2.0 mmol, 280.0 mg, 2.0 equiv.), Na<sub>2</sub>CO<sub>3</sub> (1.0 mmol, 106.0 mg, 1.0 equiv.), NBE (2.0 mmol, 188.0 mg, 2.0 equiv.), **1a** (1.0 mmol, 167.0 mg, 1.0 equiv.), **2a** (2.0 mmol, 398.0 mg, 2.0 equiv.) and DMF (10 mL) under Ar atmosphere. The reaction mixture was stirred at 70 °C for 12 h under nitrogen atmosphere in an oil bath. After cooling to room temperature, neutralized by a saturated aqueous NaCl solution, and extracted with EtOAc. The organic layers were dried over anhydrous Na<sub>2</sub>SO<sub>4</sub> and concentrated to dryness under reduced pressure. The crude product was purified by silica gel flash chromatography (PE/EA as the eluent) to give the product **3a** (0.22 g, 72% yield).

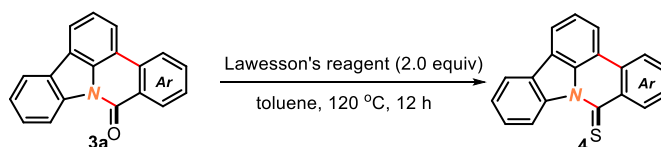

To a solution of **3a** (60.1 mg, 0.2 mmol), Lawesson's reagent (161.6 mg, 0.4 mmol), and toluene (2 mL) were successively added under air. The tube was sealed with a Teflon-coated cap and the reaction solution was heated at 120 °C for 12 h. The reaction mixture was filtered through a pad of celite and washed with DCM (10 mL). The combined organic layer was concentrated in vacuo. The crude product was purified by silica gel flash chromatography (PE:EA = 20:1 as the eluent) to give **4** as a product. Product **4**: Yellow solid (55.6 mg, 85% yield). M.p.: 225-230 °C. PE / EA = 50:1,  $R_f = 0.32$ .  $^1\text{H NMR}$  (400 MHz,  $\text{CDCl}_3$ ):  $\delta$  10.03 (d,  $J = 8.3$  Hz, 1H), 9.26 (d,  $J = 8.3$  Hz, 1H), 8.24 (d,  $J = 7.9$  Hz, 1H), 8.12 (d,  $J = 7.8$  Hz, 1H), 8.02 (d,  $J = 7.5$  Hz, 1H), 7.96 (d,  $J = 7.5$  Hz, 1H), 7.77 (t,  $J = 7.4$  Hz, 1H), 7.64 – 7.51 (m, 4H).  $^{13}\text{C NMR}$  (100 MHz,  $\text{CDCl}_3$ ):  $\delta$  186.5, 141.7, 134.8, 134.5, 133.7, 132.8, 129.0, 128.5, 128.3, 128.2, 126.7, 125.8, 124.3, 122.3, 120.8, 120.8, 120.7, 120.1, 119.5. IR (KBr): 3453, 2924, 2853, 1663, 1557, 1501, 1447, 1347, 1399, 1249, 1167, 1006, 757  $\text{cm}^{-1}$ .

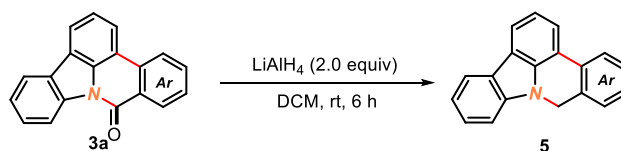

To a solution of **3a** (60.1 mg, 0.2 mmol),  $\text{LiAlH}_4$  (15.2 mg, 0.4 mmol), and DCM (2 mL) were successively added under air. The tube was sealed with a Teflon-coated cap and the reaction solution was heated at room temperature for 6 h. The reaction mixture was filtered through a pad of celite and washed with DCM (2 mL). The combined organic layer was concentrated in vacuo. The crude product was purified by silica gel flash chromatography (PE:EA = 50:1 as the eluent) to give **5** as a product. Product **5**: White solid (53.0 mg, 90% yield). M.p.: 153-160 °C. PE / EA = 50:1,  $R_f = 0.32$ .  $^1\text{H NMR}$  (400 MHz,  $\text{CDCl}_3$ ):  $\delta$  8.11 (d,  $J = 7.8$  Hz, 1H), 7.94 (dd,  $J = 11.3, 7.8$  Hz, 2H), 7.74 (d,  $J = 7.4$  Hz, 1H), 7.51 (t,  $J = 7.6$  Hz, 1H), 7.41 (d,  $J = 8.1$  Hz, 1H), 7.37 (d,  $J = 7.4$  Hz, 1H), 7.30 (dd,  $J = 13.0, 5.7$  Hz, 3H), 7.21 (t,  $J = 7.6$  Hz, 1H), 5.54 (s, 2H).  $^{13}\text{C NMR}$  (100 MHz,  $\text{CDCl}_3$ ):  $\delta$  140.2, 137.3, 130.2, 130.0, 127.8, 125.8, 123.6, 122.9, 121.4, 121.2, 120.5, 119.9, 119.7, 117.9, 117.8, 108.9, 45.8. IR (KBr): 3453, 2924, 2853, 1669, 1597, 1551, 1437, 1340, 1236, 1119, 824, 748, 555  $\text{cm}^{-1}$ .

## 6. Mechanistic Studies

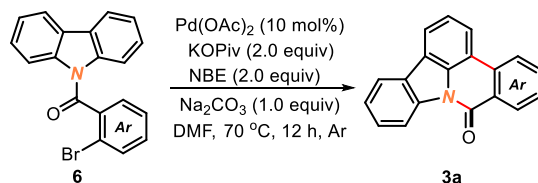

A 15 mL pressure tube was charged with Pd(OAc)<sub>2</sub> (0.02 mmol, 4.5 mg, 0.1 equiv.), KOPIv (0.4 mmol, 56.0 mg, 2.0 equiv.), Na<sub>2</sub>CO<sub>3</sub> (0.2 mmol, 21.2 mg, 1.0 equiv.), NBE (0.4 mmol, 37.6 mg, 2.0 equiv.), **6** (0.2 mmol, 77.6 mg, 1.0 equiv.) and DMF (2 mL) under Ar atmosphere. The reaction mixture was stirred at 70 °C for 12 h under nitrogen atmosphere in an oil bath. After cooling to room temperature, neutralized by a saturated aqueous NaCl solution, and extracted with EtOAc. The organic layers were dried over anhydrous Na<sub>2</sub>SO<sub>4</sub> and TLC analysis indicated the absence of product **3a**.

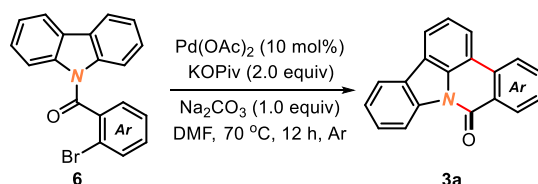

A 15 mL pressure tube was charged with Pd(OAc)<sub>2</sub> (0.02 mmol, 4.5 mg, 0.1 equiv.), KOPIv (0.4 mmol, 56.0 mg, 2.0 equiv.), Na<sub>2</sub>CO<sub>3</sub> (0.2 mmol, 21.2 mg, 1.0 equiv.), **6** (0.2 mmol, 77.6 mg, 1.0 equiv.) and DMF (2 mL) under Ar atmosphere. The reaction mixture was stirred at 70 °C for 12 h under nitrogen atmosphere in an oil bath. After cooling to room temperature, neutralized by a saturated aqueous NaCl solution, and extracted with EtOAc. The organic layers were dried over anhydrous Na<sub>2</sub>SO<sub>4</sub> and concentrated to dryness under reduced pressure. The organic layers were dried over anhydrous Na<sub>2</sub>SO<sub>4</sub> and TLC analysis indicated the absence of product **3a**.

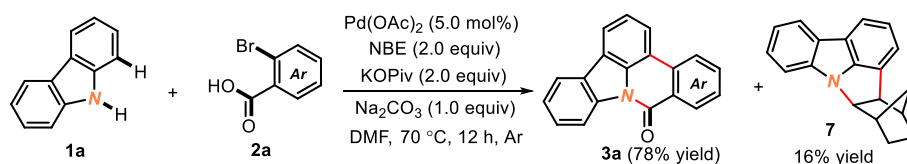

A 15 mL pressure tube was charged with Pd(OAc)<sub>2</sub> (0.01 mmol, 2.3 mg, 0.05 equiv.), KOPIv (0.4 mmol, 56.0 mg, 2.0 equiv.), Na<sub>2</sub>CO<sub>3</sub> (0.2 mmol, 21.2 mg, 1.0 equiv.), NBE (0.4 mmol, 37.6 mg, 2.0 equiv.), **1a** (0.2 mmol, 33.4 mg, 1.0 equiv.), **2** (0.4 mmol, 79.6 mg, 2.0 equiv.) and DMF (2

mL) under Ar atmosphere. The reaction mixture was stirred at 70 °C for 12 h under nitrogen atmosphere in an oil bath. After cooling to room temperature, neutralized by a saturated aqueous NaCl solution, and extracted with EtOAc. The organic layers were dried over anhydrous Na<sub>2</sub>SO<sub>4</sub> and concentrated to dryness under reduced pressure. The crude product was purified by silica gel flash chromatography (PE/EA as the eluent) to give the products **3a** and **7**. Product **7**: White solid (8.32 mg, 16% yield). PE / EA = 50:1, R<sub>f</sub> = 0.32. M.p.: 54-56 °C. <sup>1</sup>H NMR (400 MHz, CDCl<sub>3</sub>): δ 8.16 (d, *J* = 7.9 Hz, 1H), 7.82 (d, *J* = 7.6 Hz, 1H), 7.51 (d, *J* = 4.0 Hz, 2H), 7.30 (dt, *J* = 8.2, 4.1 Hz, 1H), 7.24 (d, *J* = 6.8 Hz, 1H), 7.18 (t, *J* = 7.3 Hz, 1H), 4.83 (d, *J* = 6.5 Hz, 1H), 4.07 (d, *J* = 6.5 Hz, 1H), 2.91 (s, 1H), 2.61 (s, 1H), 1.79 (t, *J* = 11.3, 5.9 Hz, 2H), 1.58 – 1.47 (m, 2H), 1.25 (t, *J* = 8.8 Hz, 2H). <sup>13</sup>C NMR (100 MHz, CDCl<sub>3</sub>): δ 152.3, 138.2, 127.2, 126.7, 124.9, 122.5, 120.6, 119.4, 118.7, 118.2, 114.5, 109.7, 69.2, 59.2, 42.1, 40.4, 33.5, 28.6, 25.7. IR (KBr): 3053, 2924, 2873, 1643, 1577, 1492, 1447, 1321, 1255, 1119, 1041, 918, 744, 622 cm<sup>-1</sup>.

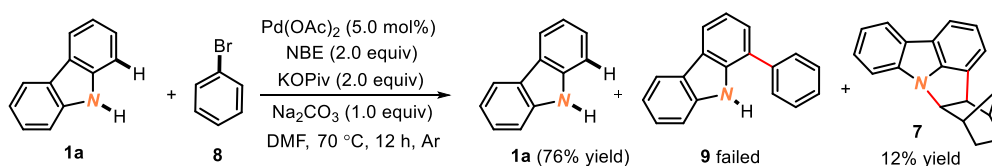

A 15 mL pressure tube was charged with Pd(OAc)<sub>2</sub> (0.01 mmol, 2.3 mg, 0.05 equiv.), KOPIV (0.4 mmol, 56.0 mg, 2.0 equiv.), Na<sub>2</sub>CO<sub>3</sub> (0.2 mmol, 21.2 mg, 1.0 equiv.), NBE (0.4 mmol, 37.6 mg, 2.0 equiv.), **1a** (0.2 mmol, 33.4 mg, 1.0 equiv.), **8** (0.4 mmol, 62.8 mg, 2.0 equiv.) and DMF (2 mL) under Ar atmosphere. The reaction mixture was stirred at 70 °C for 12 h under nitrogen atmosphere in an oil bath. After cooling to room temperature, neutralized by a saturated aqueous NaCl solution, and extracted with EtOAc. The organic layers were dried over anhydrous Na<sub>2</sub>SO<sub>4</sub> and concentrated to dryness under reduced pressure. The crude product was purified by silica gel flash chromatography (PE/EA as the eluent) to give the products **1a** and **7**. And the wanted compound **9** was did not detected.

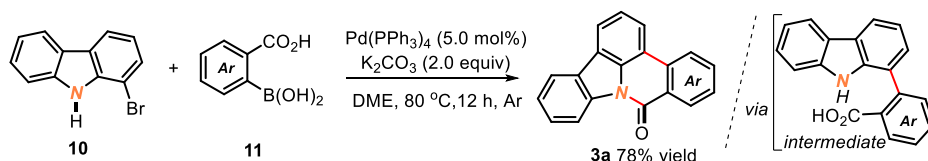

A 15 mL pressure tube was charged with Pd(PPh<sub>3</sub>)<sub>4</sub> (0.01 mmol, 11.5 mg, 0.05 equiv.),

$\text{K}_2\text{CO}_3$  (0.2 mmol, 27.6 mg, 2.0 equiv.), **8** (0.2 mmol, 44.8 mg, 1.0 equiv.), **11** (0.24 mmol, 39.8 mg, 1.2 equiv.) and DME (2 mL) under Ar atmosphere. The reaction mixture was stirred at 80 °C for 12 h under nitrogen atmosphere in an oil bath. After cooling to room temperature, neutralized by a saturated aqueous  $\text{NaHCO}_3$  solution, and extracted with EtOAc. The organic layers were dried over anhydrous  $\text{Na}_2\text{SO}_4$  and concentrated to dryness under reduced pressure. The crude product was purified by silica gel flash chromatography (PE/EA as the eluent) to give the products **3a**.

## 7. Crystallographic data

Methods to get single crystals suitable for X-ray diffraction test: **3c** was dissolved in 2 mL of  $\text{CH}_2\text{Cl}_2$ , filtered, and then injected into a 20 mL vial. Subsequently, 5 mL of hexane was slowly added to the vial without shaking and the solution was allowed to evaporate slowly over the course of 2 days to give yellow single crystal.

Single crystal structures were measured on a Bruker D8 Venture with TXS diffractometer with a graphite monochromated Mo  $\text{K}\alpha$  ( $\lambda = 0.71073 \text{ \AA}$ , at 296(2) K) radiation. The structure was solved by direct methods and refined anisotropically based on  $F^2$  by a full-matrix least-squares refinement with the SHELXL-2014 program. Anisotropic thermal parameters were applied to non-hydrogen atoms, and all hydrogen atoms of organic ligands were calculated and added at the theoretical positions.

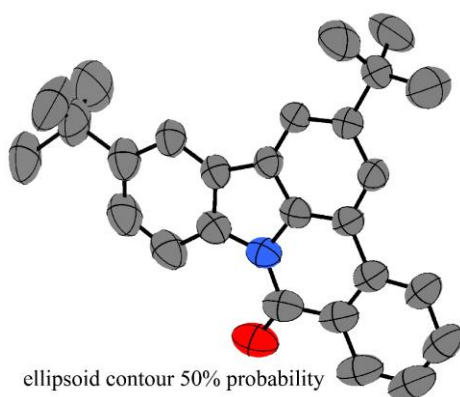

**Figure S2** Molecular structure of  $\text{C}_{27}\text{H}_{27}\text{NO}$ , (**3c**). The thermal ellipsoids are shown at 50% probability.



**Table S2** Crystal, Intensity Collection, and Refinement Data for Complexes 3c.

| complex                                                                     | 3c                                                                     |
|-----------------------------------------------------------------------------|------------------------------------------------------------------------|
| CCDC number                                                                 | 2366116                                                                |
| Empirical formula                                                           | C <sub>27</sub> H <sub>17</sub> NO                                     |
| Formula weight                                                              | 381.49                                                                 |
| Temperature [K]                                                             | 293.00                                                                 |
| Crystal system                                                              | triclinic                                                              |
| Space group (number)                                                        | P-1 (2)                                                                |
| <i>a</i> [Å]                                                                | 7.057(3)                                                               |
| <i>b</i> [Å]                                                                | 12.282(4)                                                              |
| <i>c</i> [Å]                                                                | 13.493 (5)                                                             |
| $\alpha$ [°]                                                                | 76.338(13)                                                             |
| $\beta$ [°]                                                                 | 79.786(14)                                                             |
| $\gamma$ [°]                                                                | 78.458(14)                                                             |
| Volume [Å <sup>3</sup> ]                                                    | 1103.0(8)                                                              |
| <i>Z</i>                                                                    | 2                                                                      |
| $\rho_{\text{calc}}$ [gcm <sup>-3</sup> ]                                   | 1.149                                                                  |
| $\mu$ [mm <sup>-1</sup> ]                                                   | 0.069                                                                  |
| <i>F</i> (000)                                                              | 408.0                                                                  |
| Crystal size [mm <sup>3</sup> ]                                             | 0.13×0.12×0.1                                                          |
| Crystal colour                                                              | clear light colourless                                                 |
| Crystal shape                                                               | block                                                                  |
| Radiation                                                                   | MoK $\alpha$ ( $\lambda$ = 0.71073)                                    |
| 2 $\theta$ range [°]                                                        | 5.948 to 55.196<br>-9 ≤ <i>h</i> ≤ 9                                   |
| Index ranges                                                                | -15 ≤ <i>k</i> ≤ 15<br>-17 ≤ <i>l</i> ≤ 17                             |
| Reflections collected                                                       | 32354<br>5054                                                          |
| Independent reflections                                                     | <i>R</i> <sub>int</sub> = 0.1207<br><i>R</i> <sub>sigma</sub> = 0.0655 |
| Completeness to<br>$\theta$ = 53.594°                                       | 99.7 %                                                                 |
| Data / Restraints / Parameters                                              | 5054/87/299                                                            |
| Goodness-of-fit on <i>F</i> <sup>2</sup>                                    | 1.031                                                                  |
| <i>R</i> <sub>1</sub> [ <i>I</i> ≥ 2 $\sigma$ ( <i>I</i> )] <sup>[a]</sup>  | 0.0746                                                                 |
| <i>wR</i> <sub>2</sub> [ <i>I</i> ≥ 2 $\sigma$ ( <i>I</i> )] <sup>[b]</sup> | 0.2036                                                                 |
| <i>R</i> <sub>1</sub> [ <i>I</i> ≥ 2 $\sigma$ ( <i>I</i> )] <sup>[a]</sup>  | 0.1377                                                                 |
| <i>R</i> <sub>1</sub> [all data] <sup>[b]</sup>                             | 0.2676                                                                 |
| <i>R</i> <sub>1</sub> Largest peak/hole [eÅ <sup>-3</sup> ]                 | 0.27/-0.21                                                             |

$$^{[a]}R_1 = F_o - F_c / F_o$$

$$^{[b]}wR_2 = \{w[(F_o)^2 - (F_c)^2]^2 / w[(F_o)^2]^2\}^{1/2}$$

## 8. NMR and HRMS spectra

The HRMS spectra of compounds **3a**<sup>[3]</sup> and **7**<sup>[4]</sup> have been reported in relevant literatures.  
<sup>1</sup>H NMR of **3a** (400 MHz, CDCl<sub>3</sub> + CF<sub>3</sub>COOD)

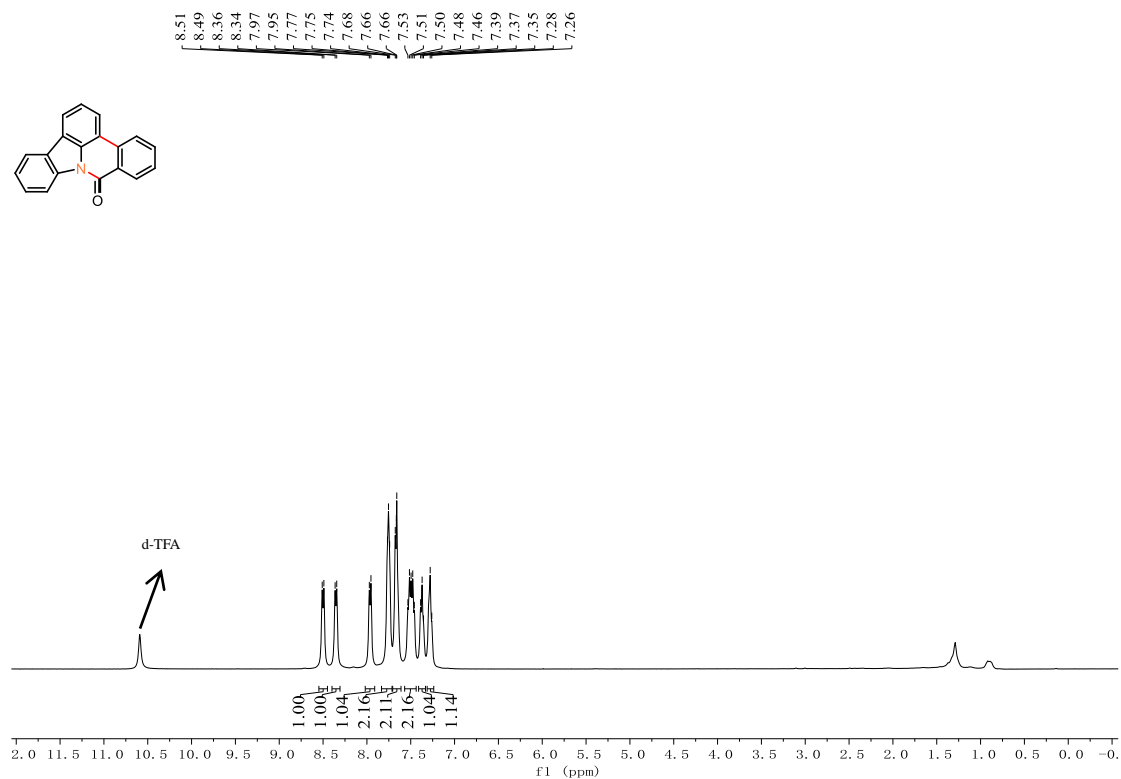

<sup>13</sup>C NMR of **3a** (100 MHz, CDCl<sub>3</sub> + CF<sub>3</sub>COOD)

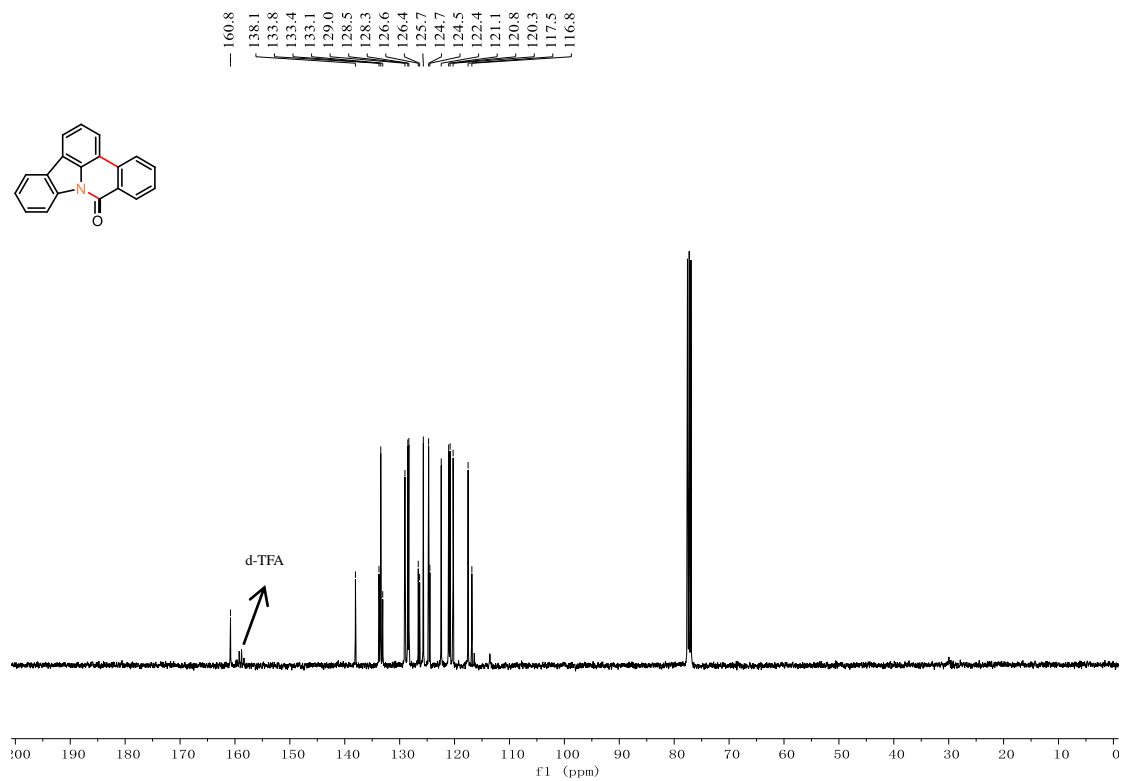

$^1\text{H}$  NMR of **3b** (400 MHz,  $\text{CDCl}_3 + \text{CF}_3\text{COOD}$ )

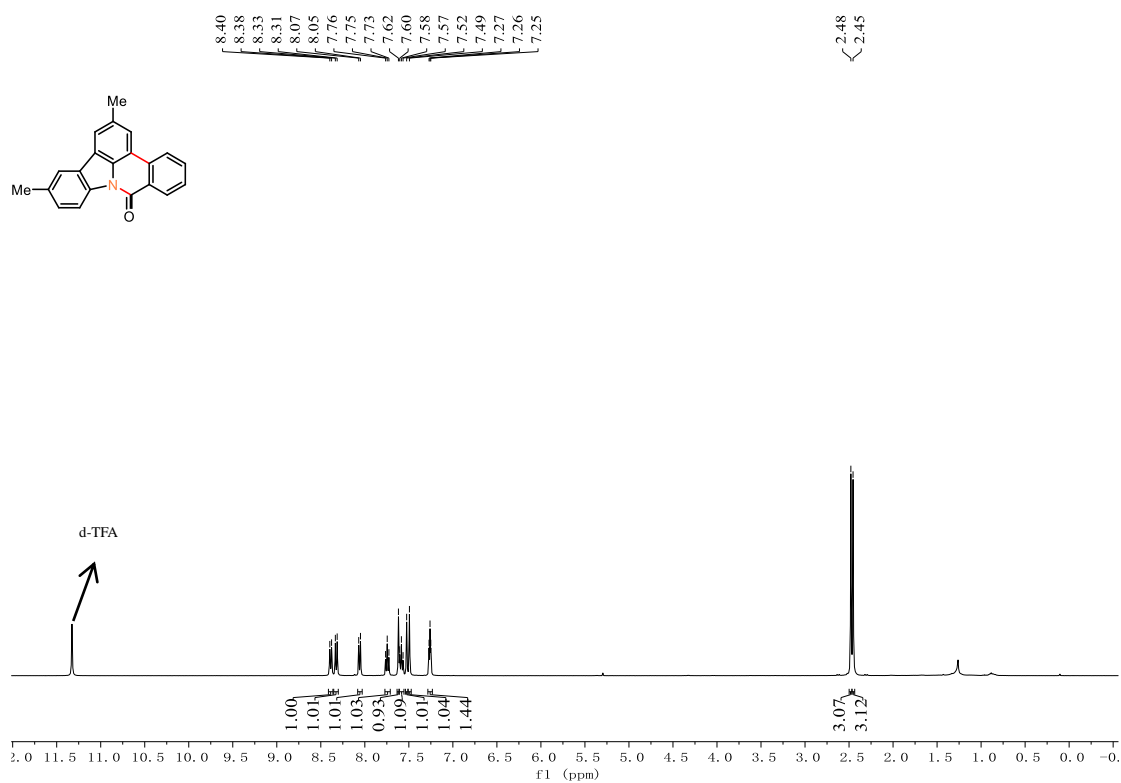

$^{13}\text{C}$  NMR of **3b** (100 MHz,  $\text{CDCl}_3 + \text{CF}_3\text{COOD}$ )

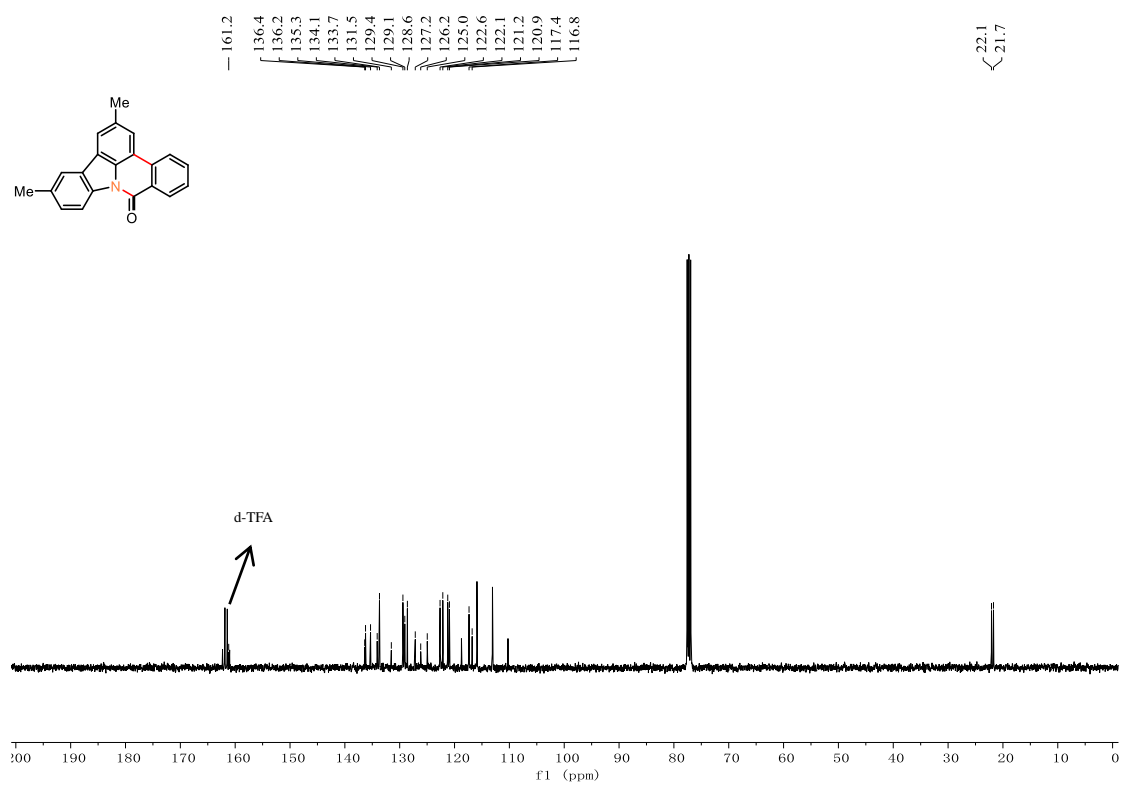

HRMS (ESI)  $m/z$  Calcd for  $C_{12}H_{16}NO$   $[M+H]^+$  298.1226, found 298.1218.

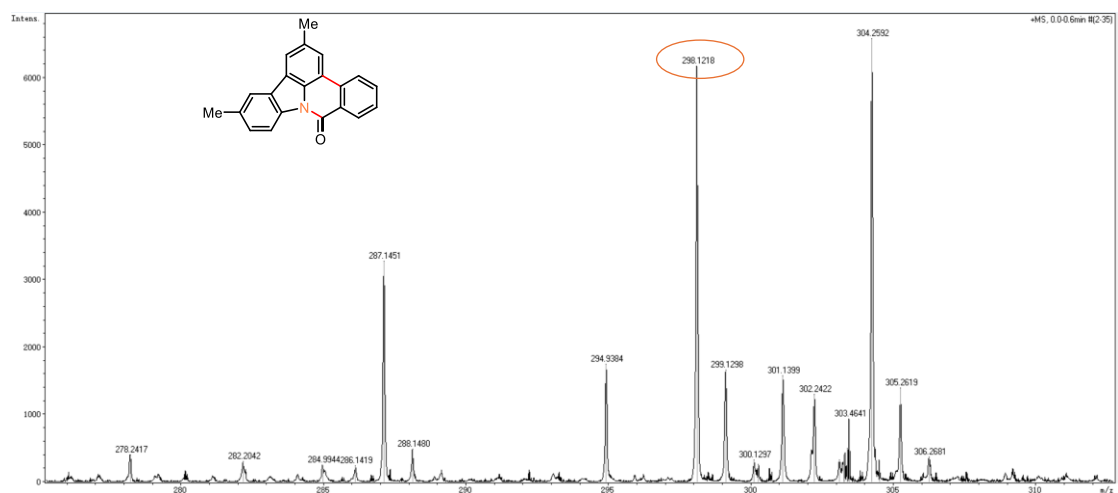

$^1H$  NMR of **3c** (400 MHz,  $CDCl_3$ )

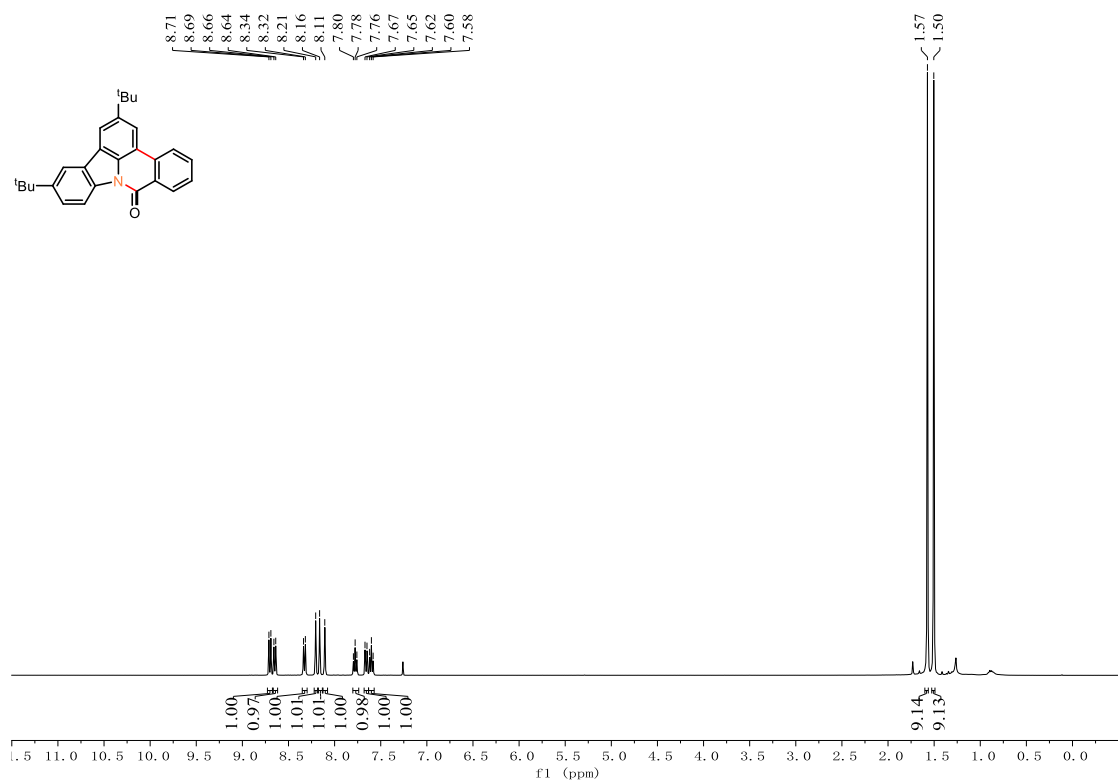

$^{13}\text{C}$  NMR of **3c** (100 MHz,  $\text{CDCl}_3$ )

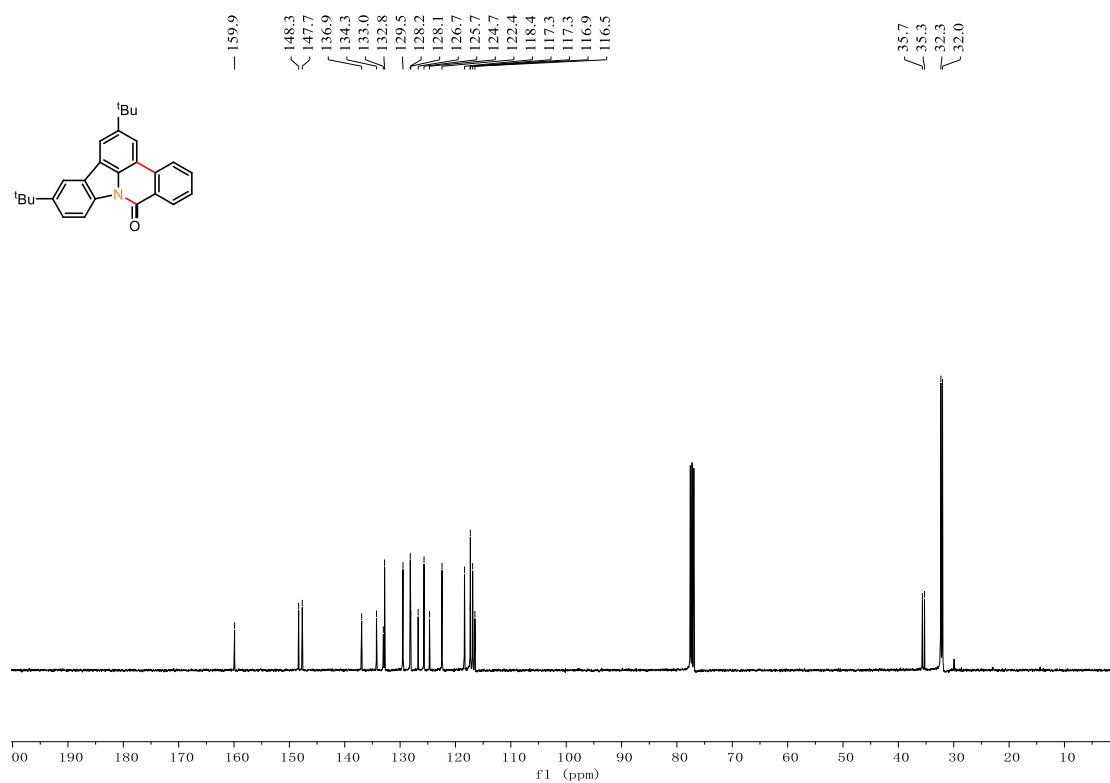

HRMS (ESI)  $m/z$  Calcd for  $\text{C}_{27}\text{H}_{28}\text{NO}$   $[\text{M}+\text{Na}]^+$  404.1985, found 404.1984.

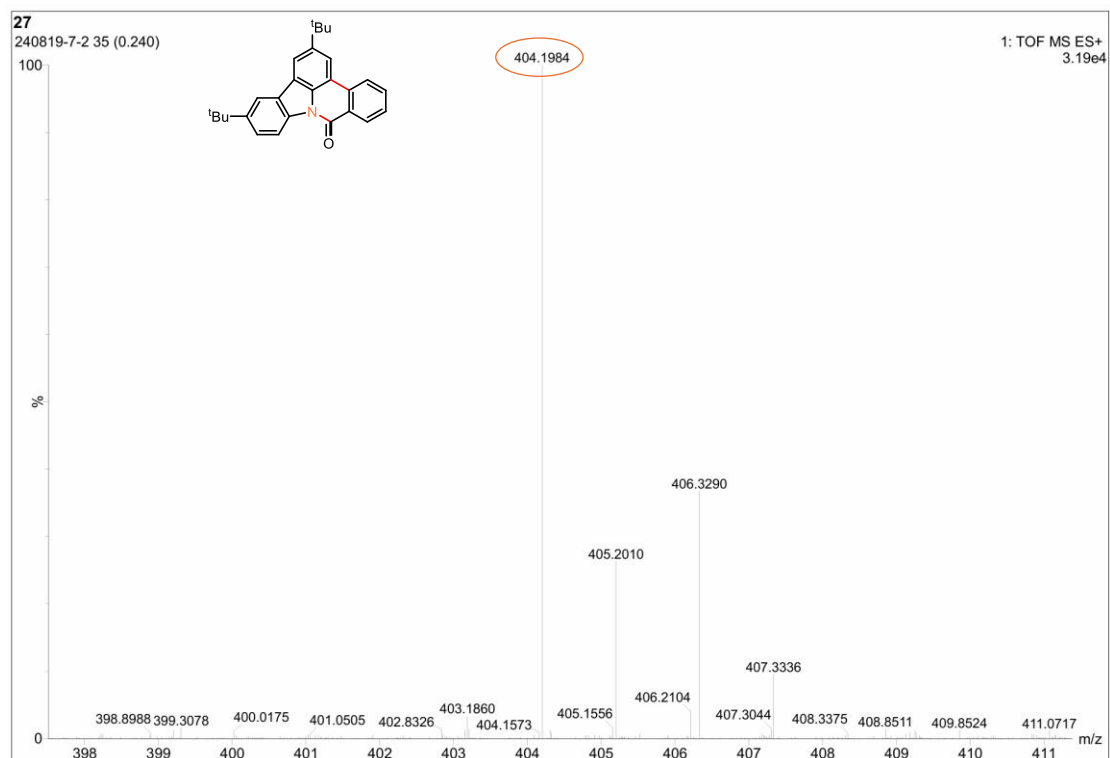

<sup>1</sup>H NMR of **3d** (400 MHz, CDCl<sub>3</sub>)

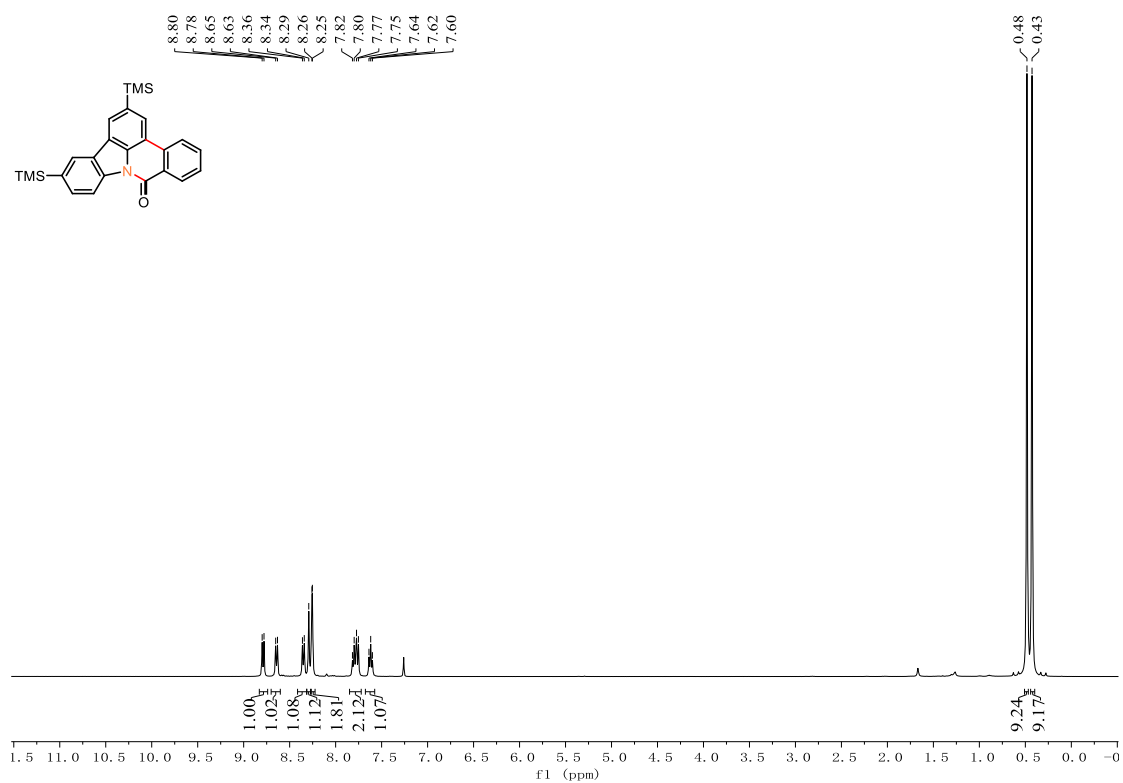

<sup>13</sup>C NMR of **3d** (100 MHz, CDCl<sub>3</sub>)

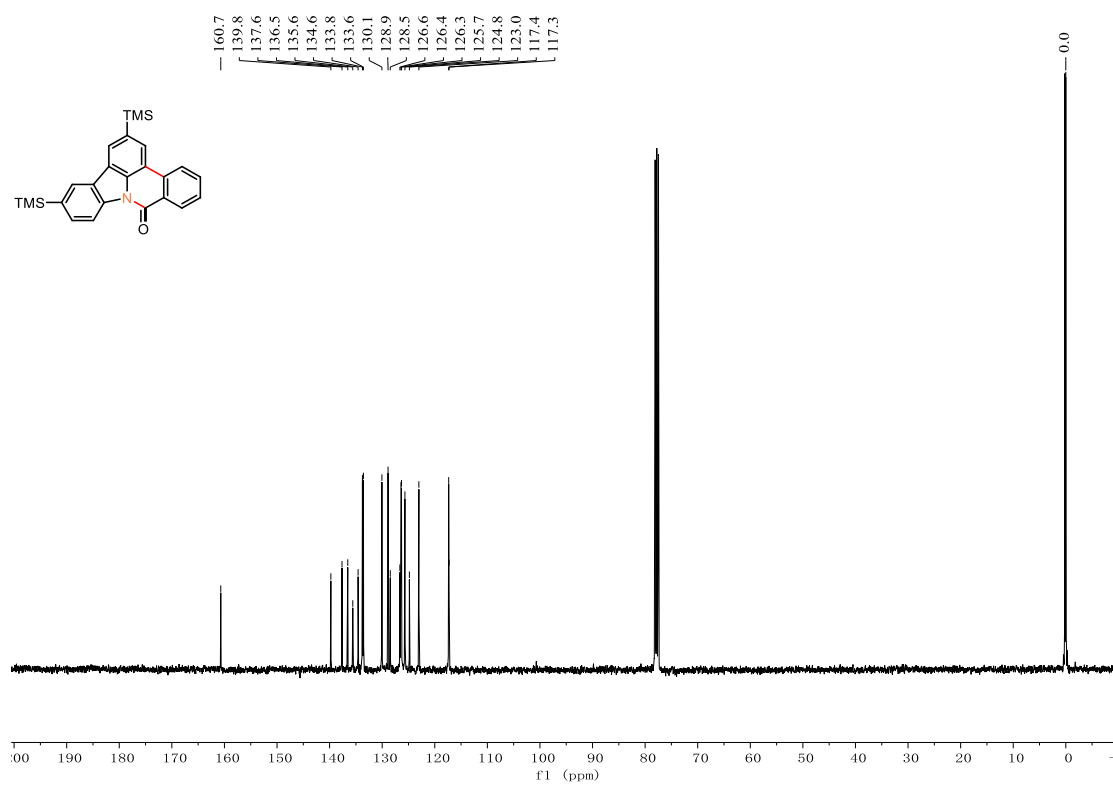

HRMS (ESI) (ESI)  $m/z$  Calcd for  $C_{25}H_{28}NOSi_2$   $[M+H]^+$  414.1704, found 414.1701.

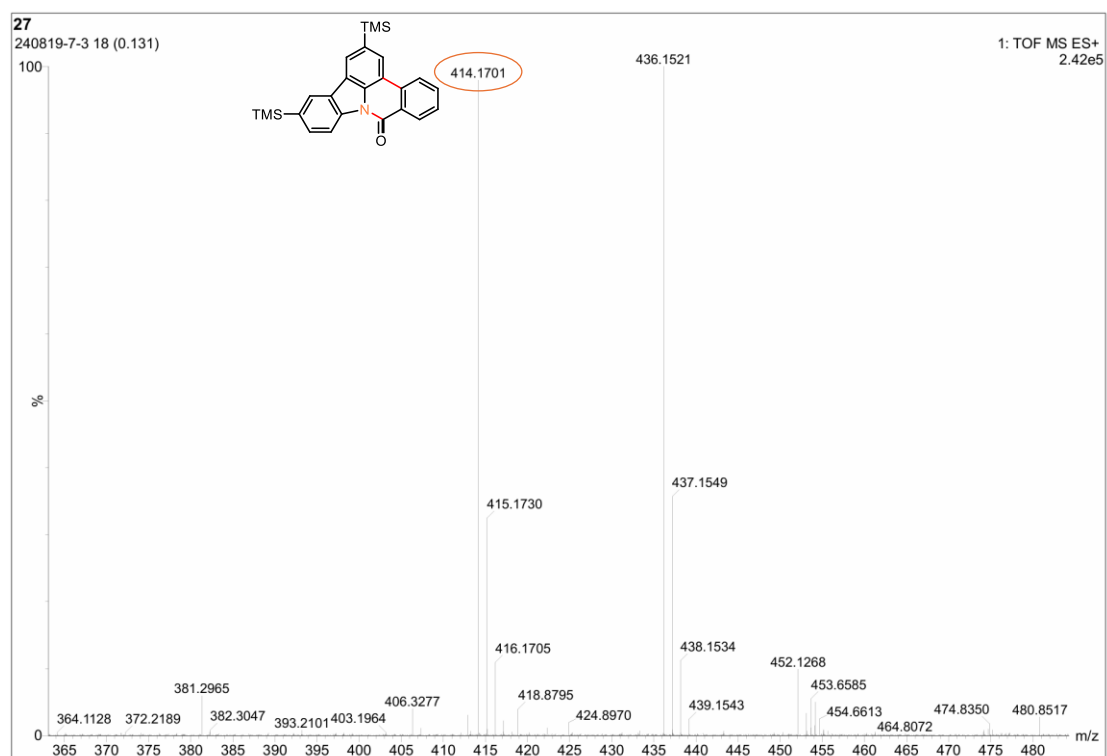

$^1H$  NMR of **3e** (400 MHz,  $CDCl_3$ )

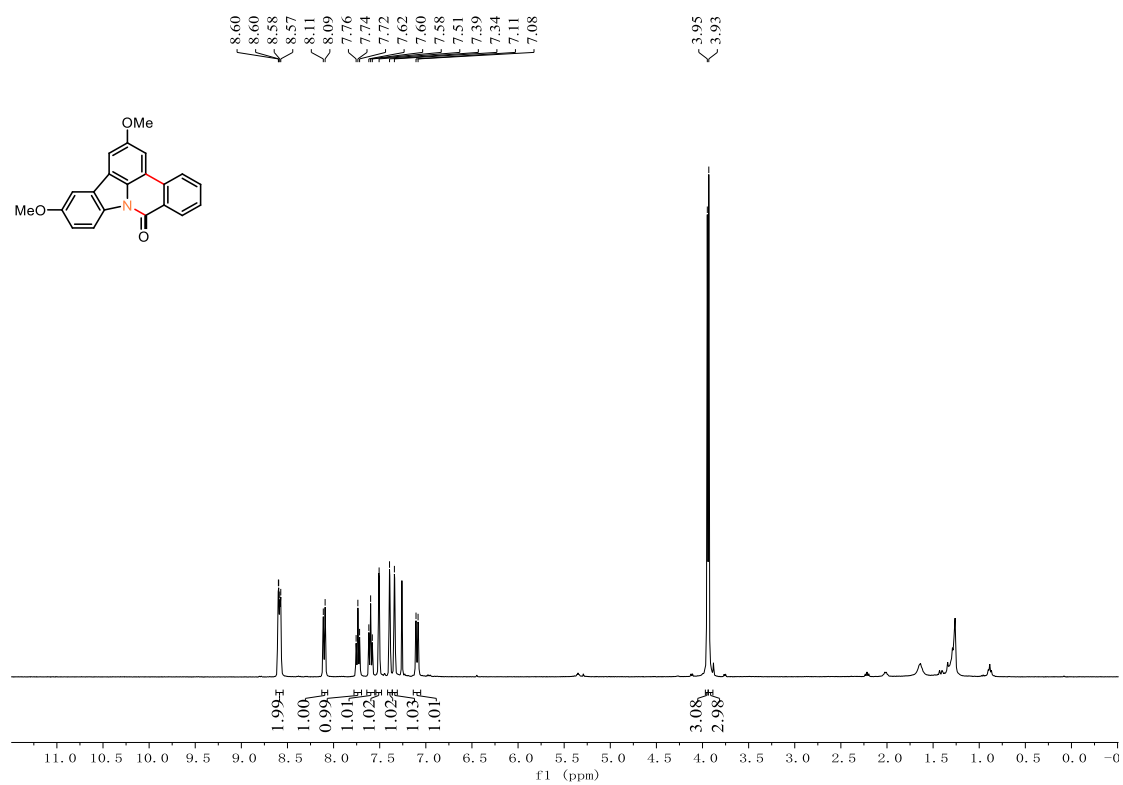

$^{13}\text{C}$  NMR of **3e** (100 MHz,  $\text{CDCl}_3$ )

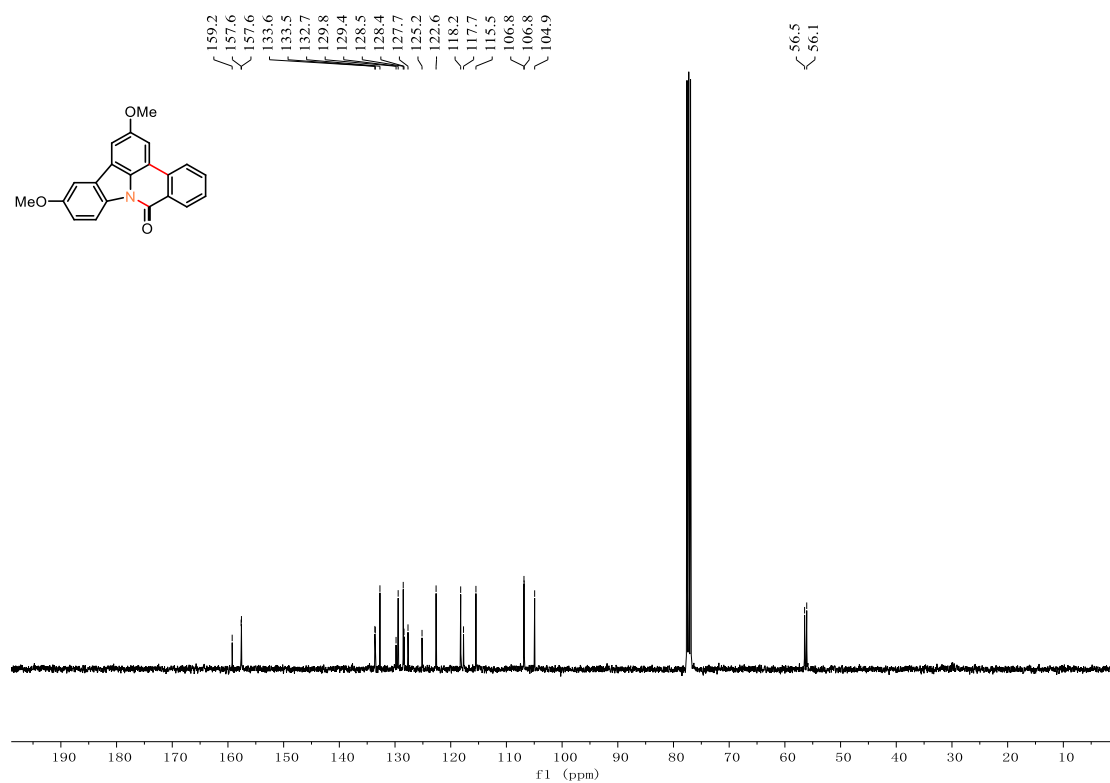

HRMS (ESI)  $m/z$  Calcd for  $\text{C}_{21}\text{H}_{16}\text{NO}_3$   $[\text{M}+\text{H}]^+$  330.1125, found 330.1128.

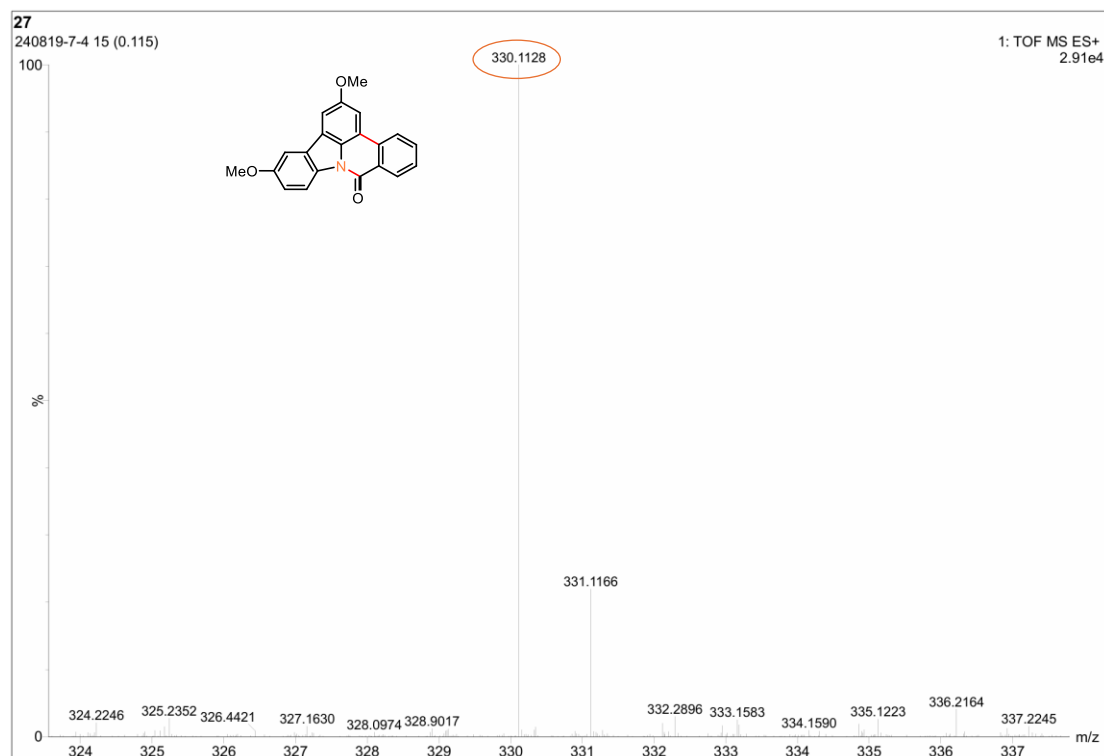



<sup>1</sup>H NMR of **3f** (400 MHz, CDCl<sub>3</sub> + CF<sub>3</sub>COOD)

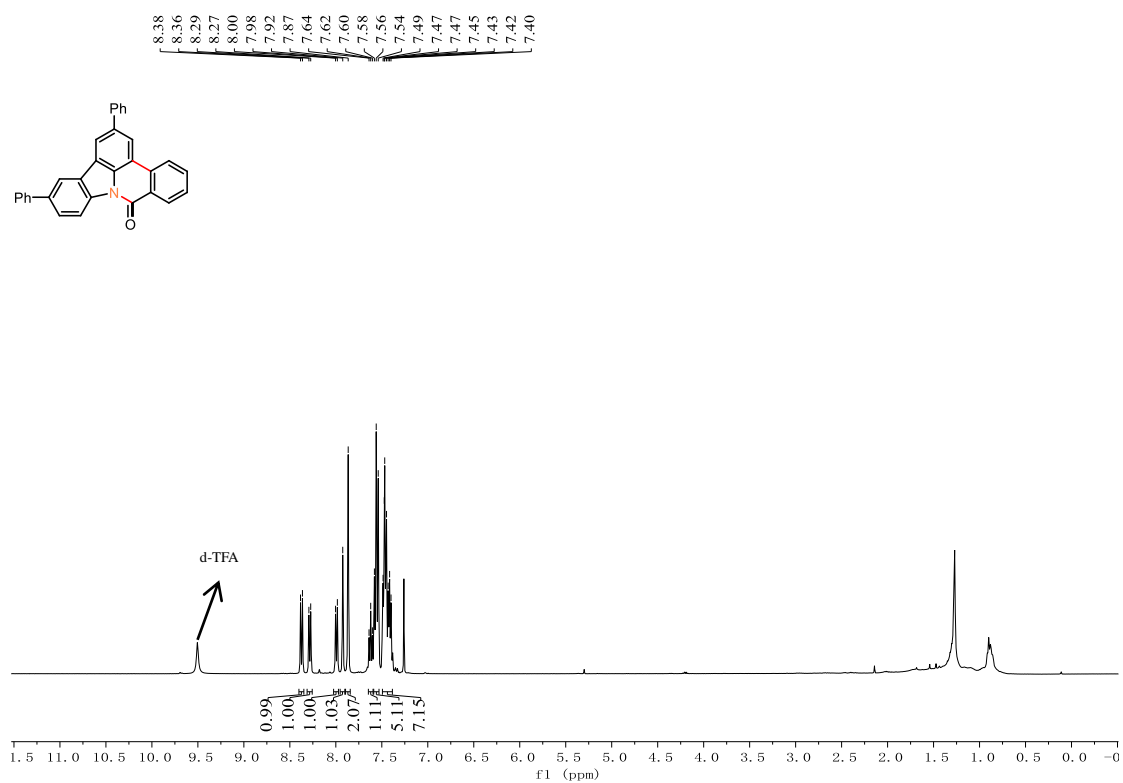

<sup>13</sup>C NMR of **3f** (100 MHz, CDCl<sub>3</sub> + CF<sub>3</sub>COOD)

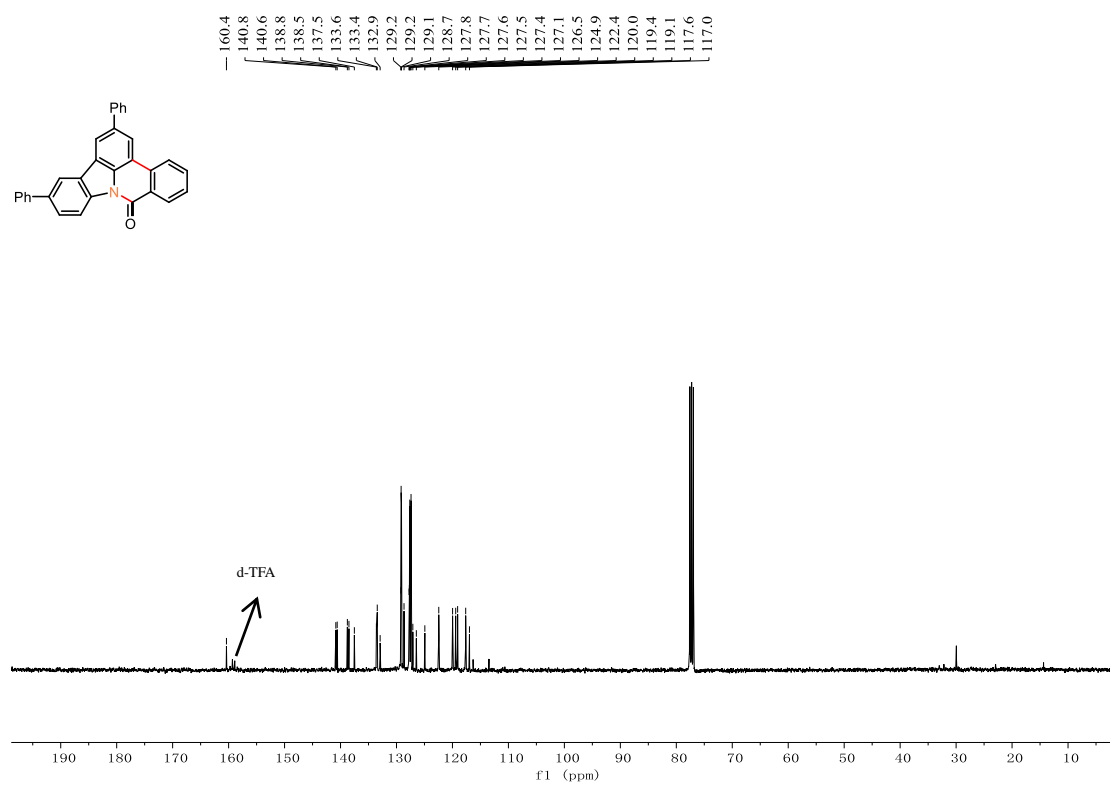

HRMS (ESI)  $m/z$  Calcd for  $C_{31}H_{20}NO$   $[M+Na]^+$  444.1359, found 444.1354.

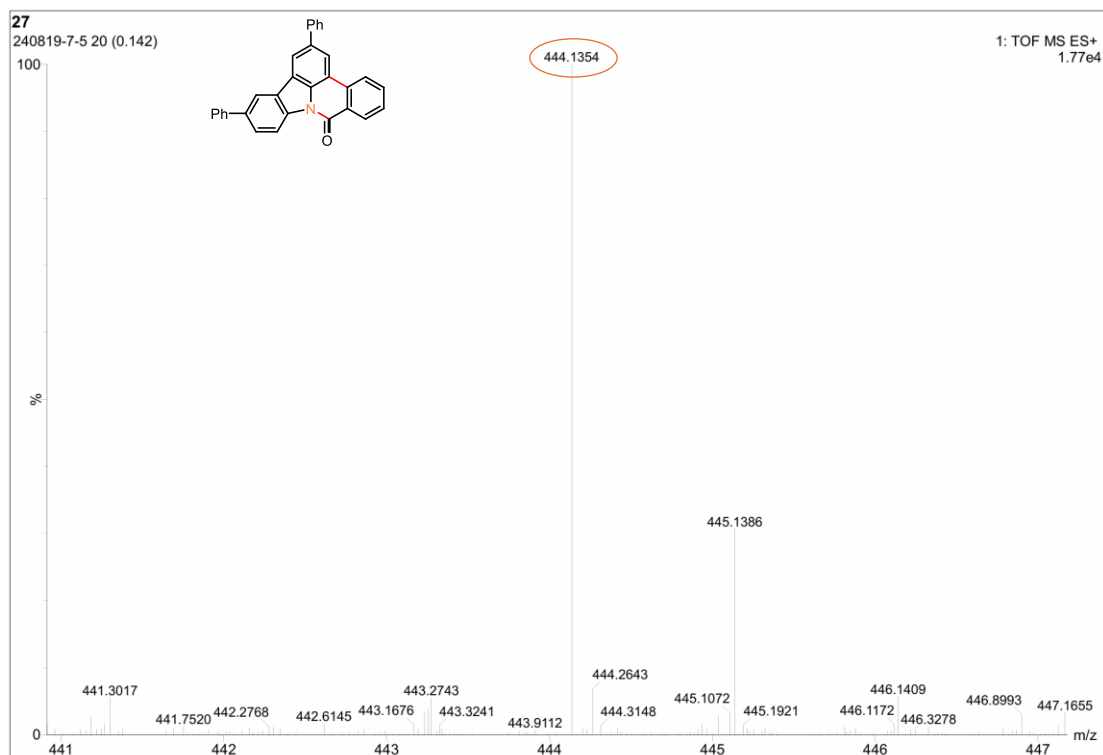

$^1H$  NMR of **3g** (400 MHz,  $CDCl_3$  +  $CF_3COOD$ )

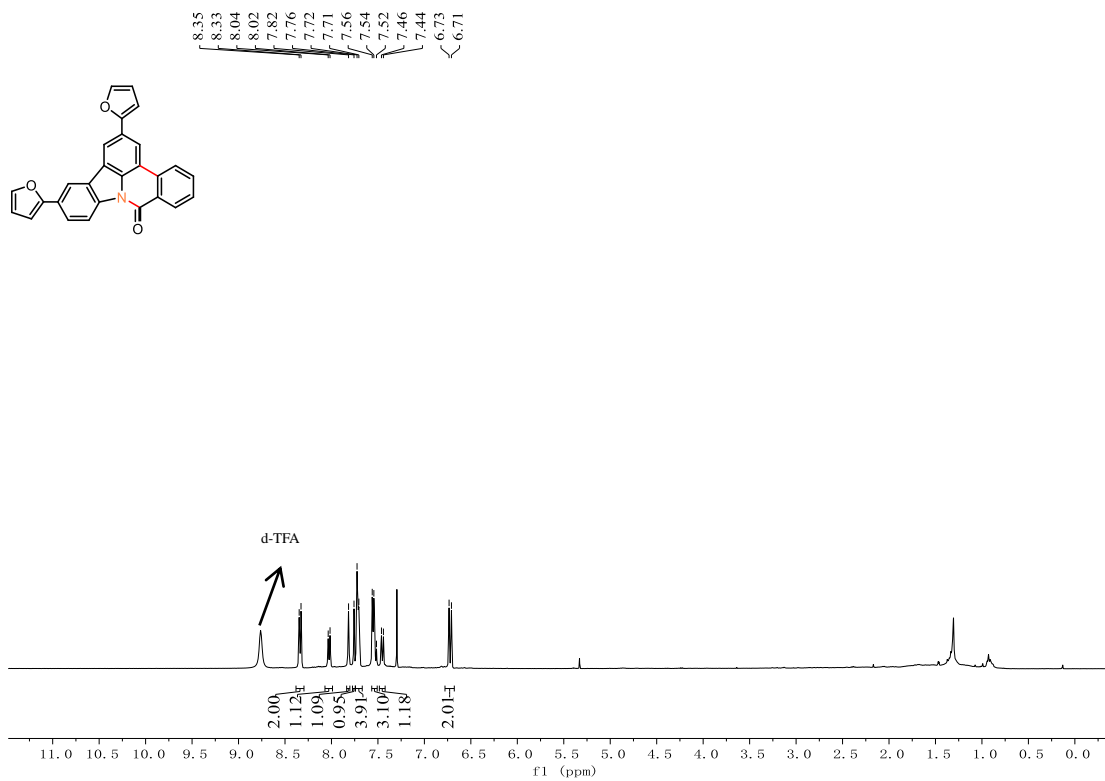

$^{13}\text{C}$  NMR of **3g** (100 MHz,  $\text{CDCl}_3 + \text{CF}_3\text{COOD}$ )

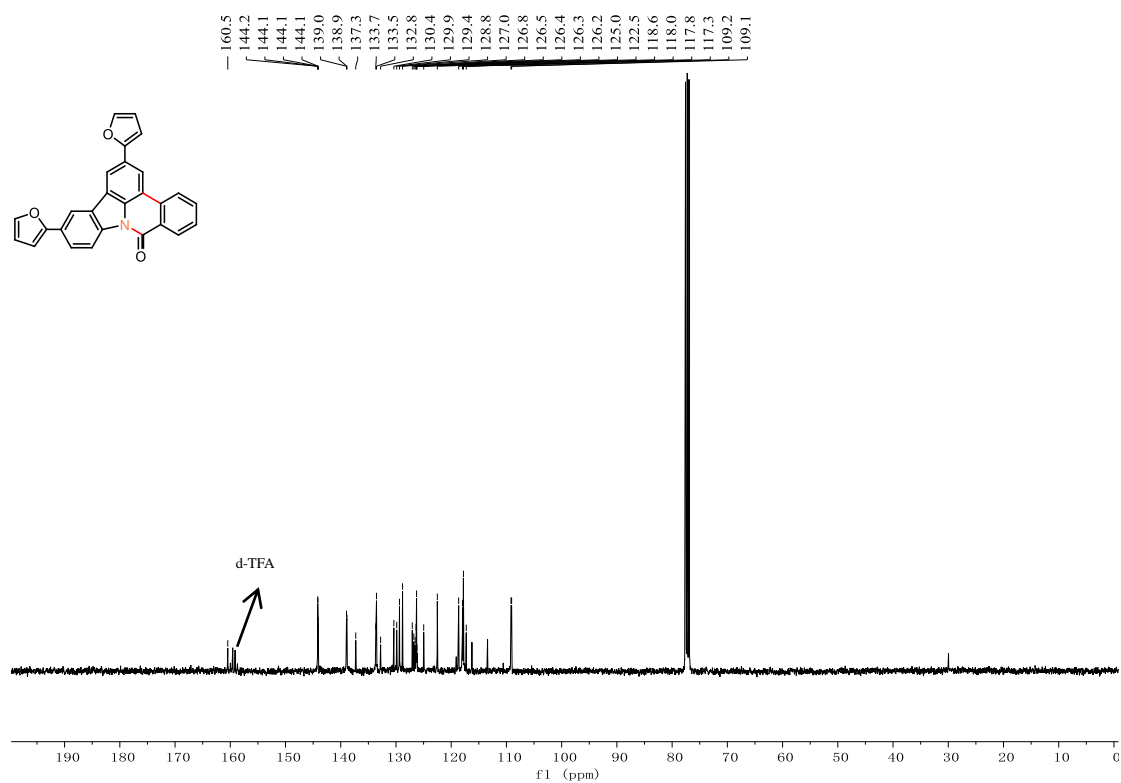

HRMS (ESI)  $m/z$  Calcd for  $\text{C}_{27}\text{H}_{16}\text{NO}_3$   $[\text{M}+\text{Na}]^+$  424.0944, found 424.0945.

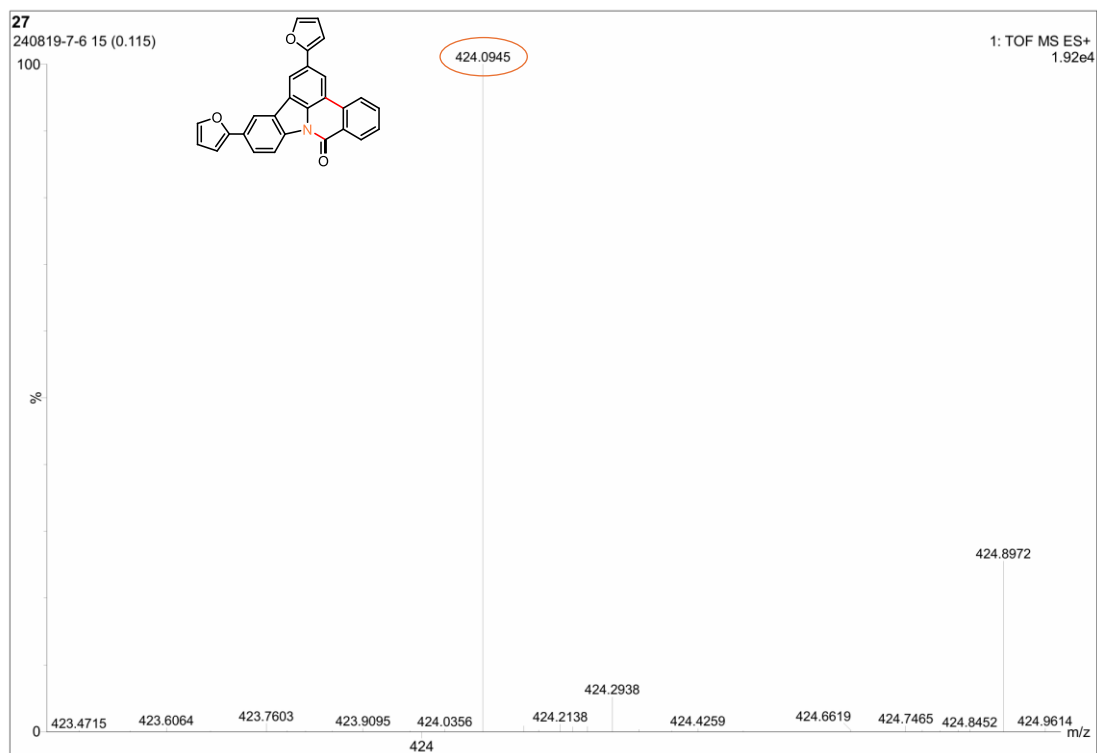

<sup>1</sup>H NMR of **3h** (400 MHz, CDCl<sub>3</sub> + CF<sub>3</sub>COOD)

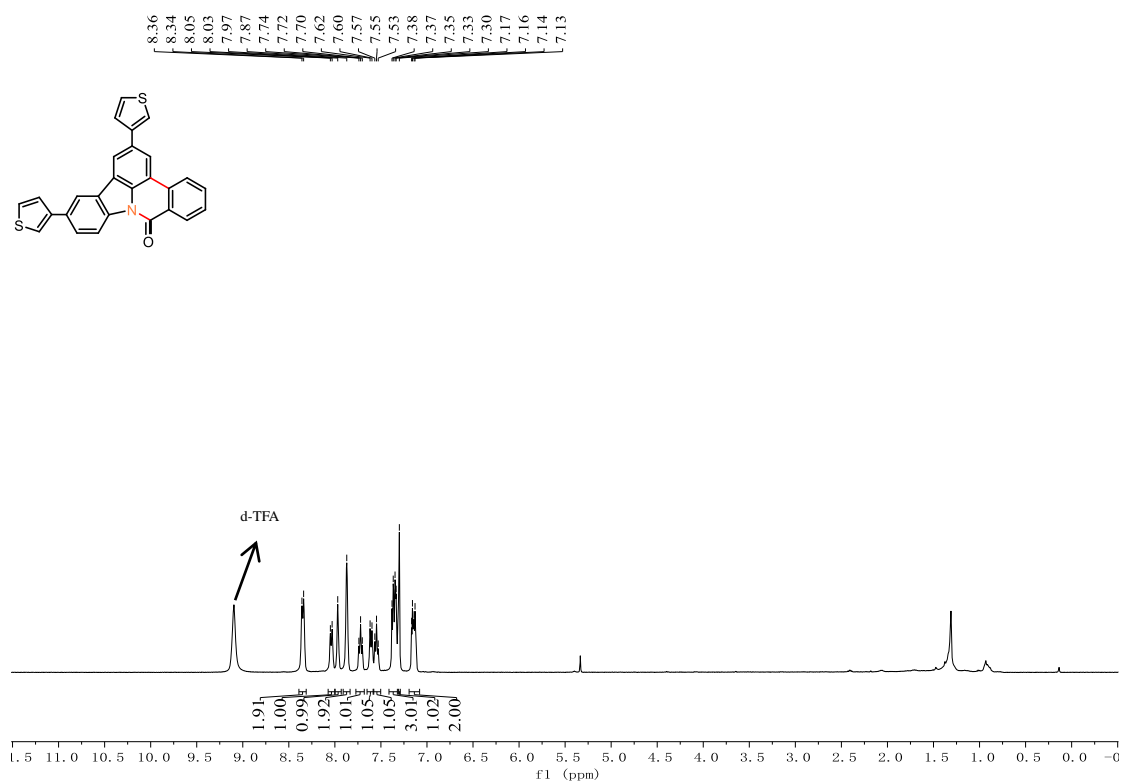

<sup>13</sup>C NMR of **3h** (100 MHz, CDCl<sub>3</sub> + CF<sub>3</sub>COOD)

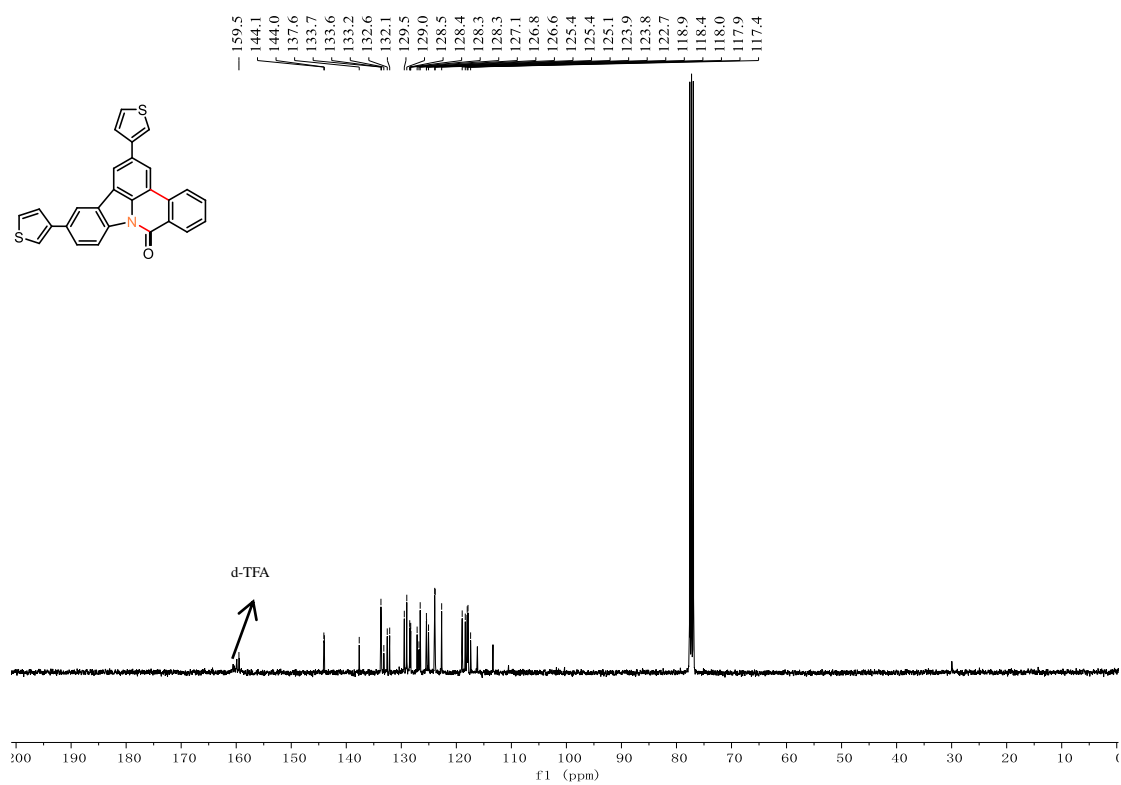

HRMS (ESI) m/z Calcd for C<sub>27</sub>H<sub>16</sub>NOS<sub>2</sub> [M+Na]<sup>+</sup> 456.0487, found 456.0486.

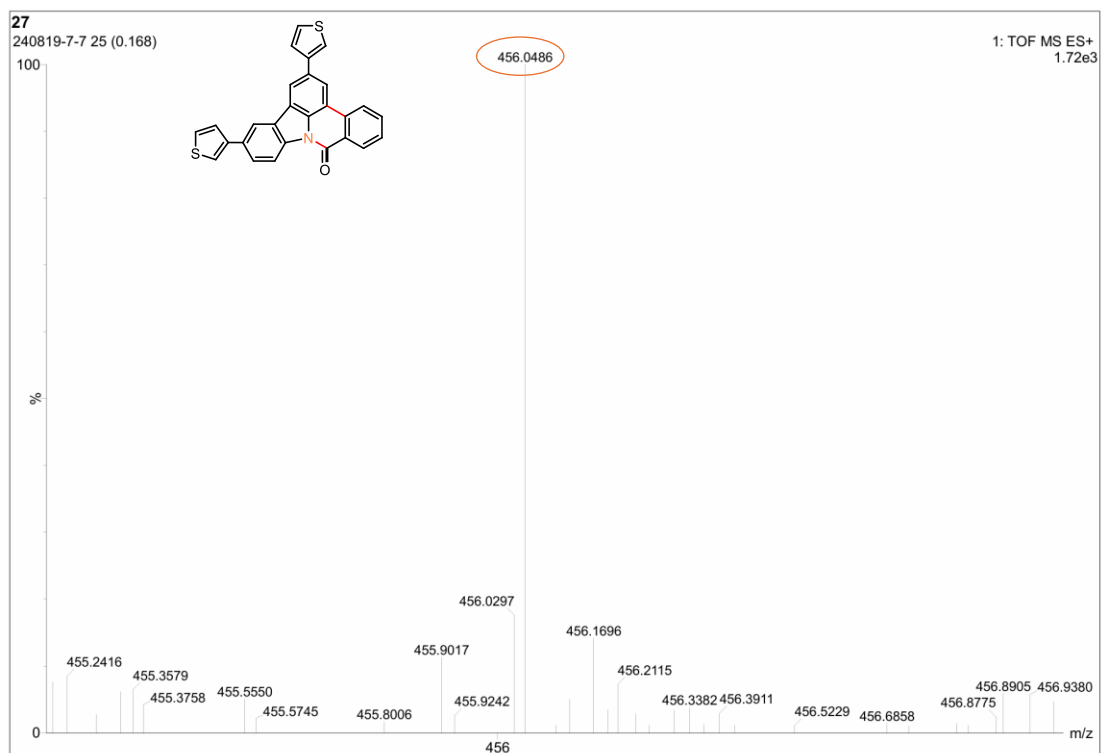

<sup>1</sup>H NMR of **3i** (400 MHz, CDCl<sub>3</sub>)

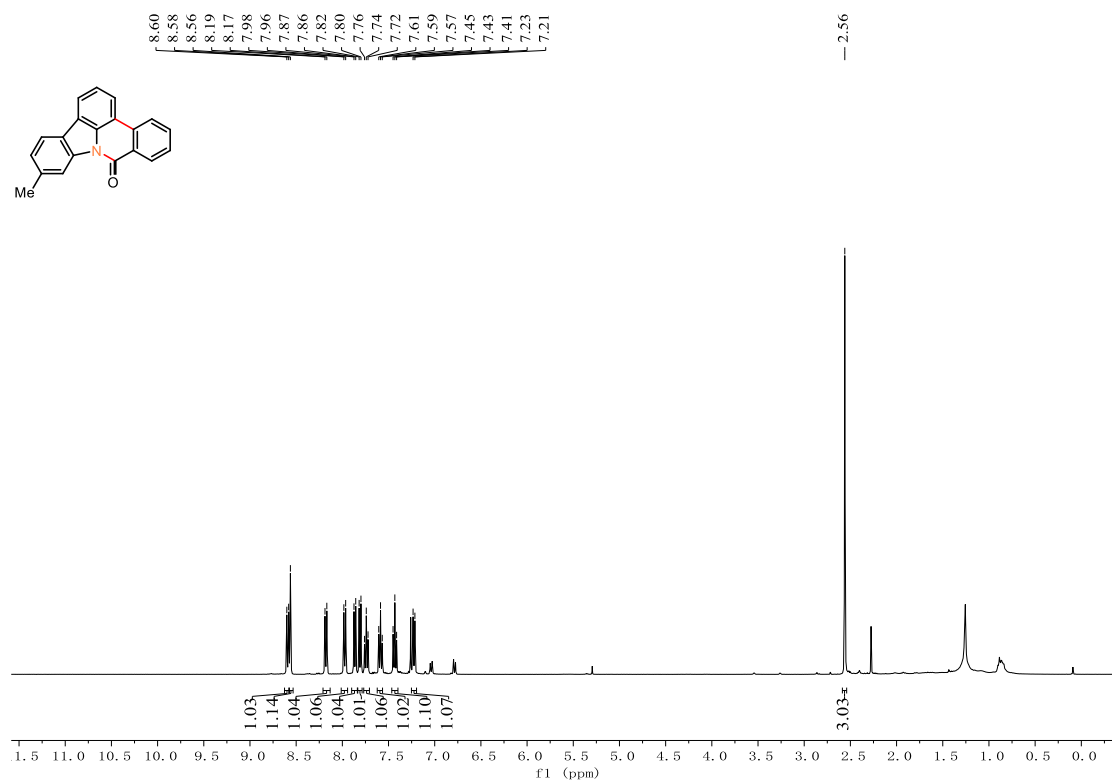

$^{13}\text{C}$  NMR of **3i** (100 MHz,  $\text{CDCl}_3$ )

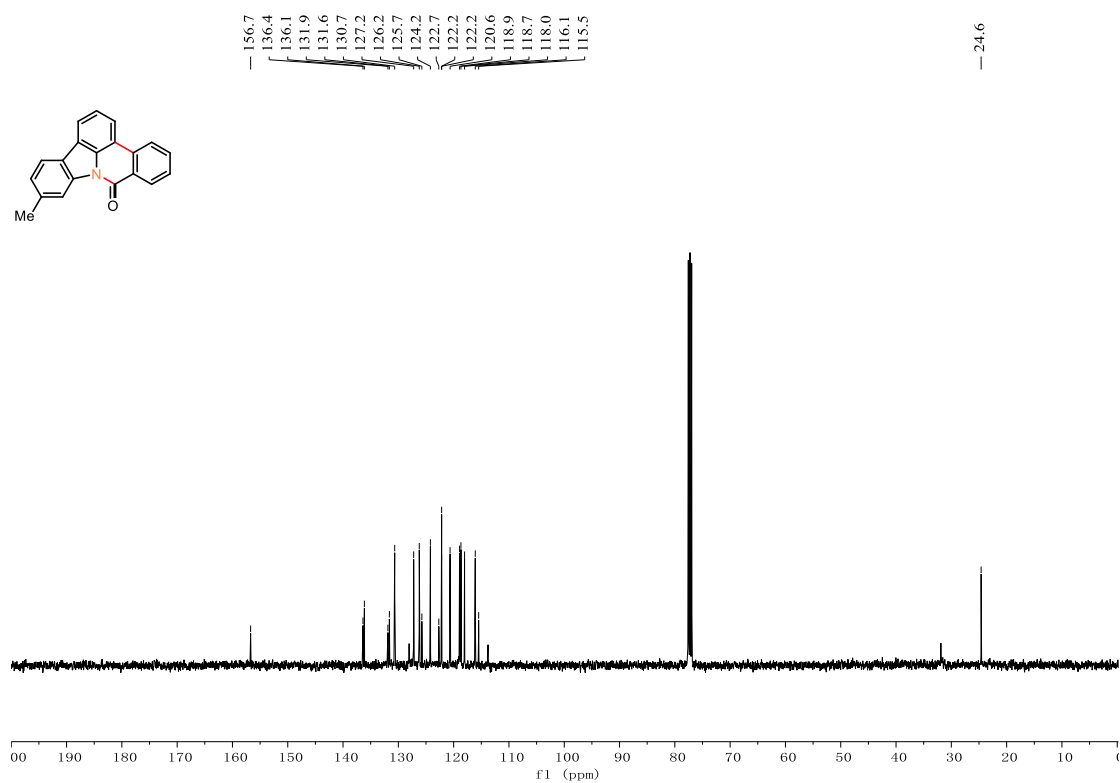

HRMS (ESI)  $m/z$  Calcd for  $\text{C}_{20}\text{H}_{14}\text{NO}$   $[\text{M}+\text{H}]^+$  284.1070, found 284.1061.

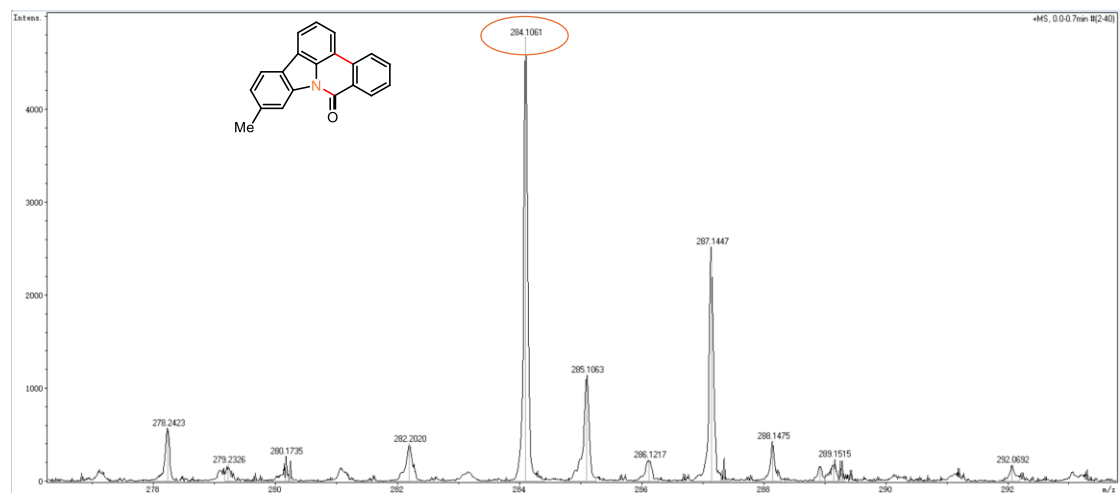

<sup>1</sup>H NMR of **3j** (400 MHz, CDCl<sub>3</sub>)

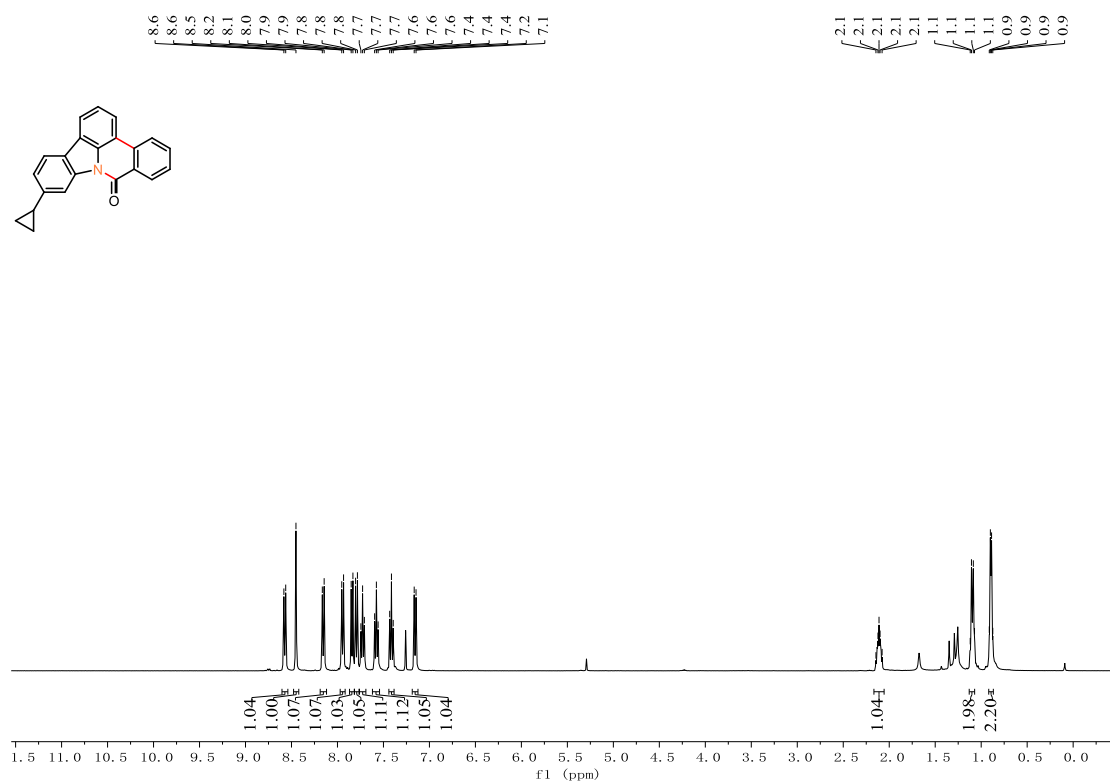

<sup>13</sup>C NMR of **3j** (100 MHz, CDCl<sub>3</sub>)

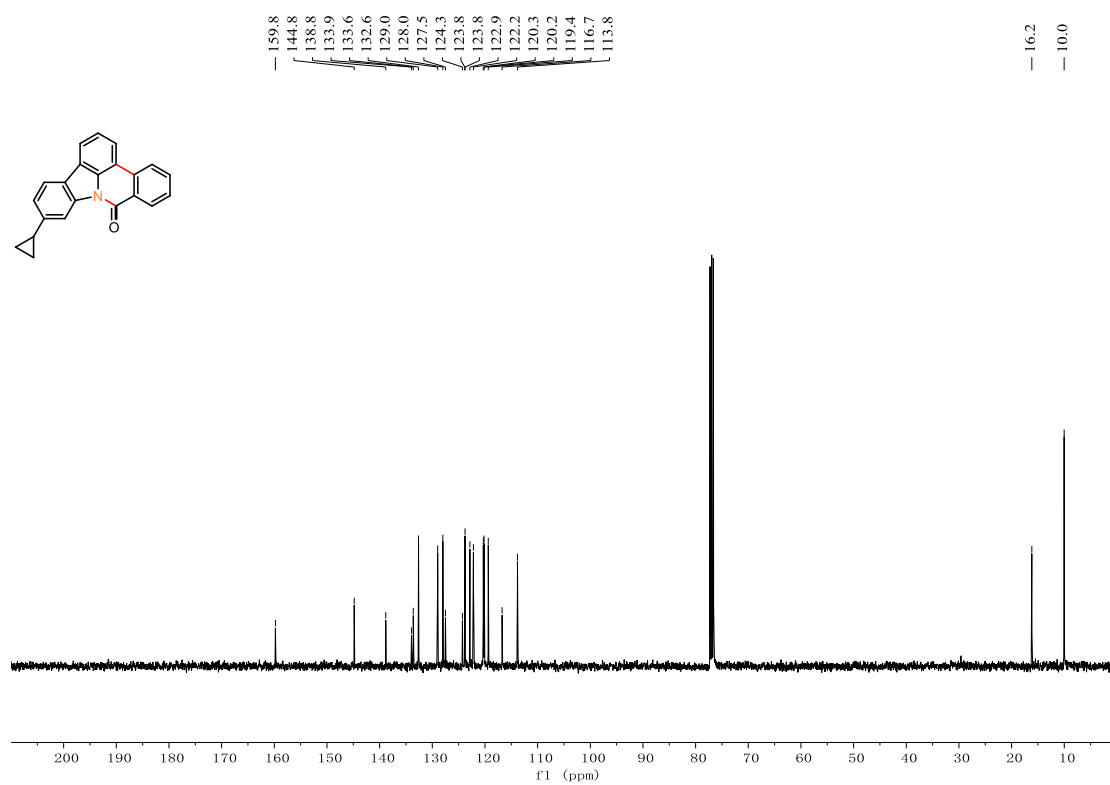

HRMS (ESI) m/z Calcd for C<sub>22</sub>H<sub>16</sub>NO [M+H]<sup>+</sup> 310.1226, found 310.1213.

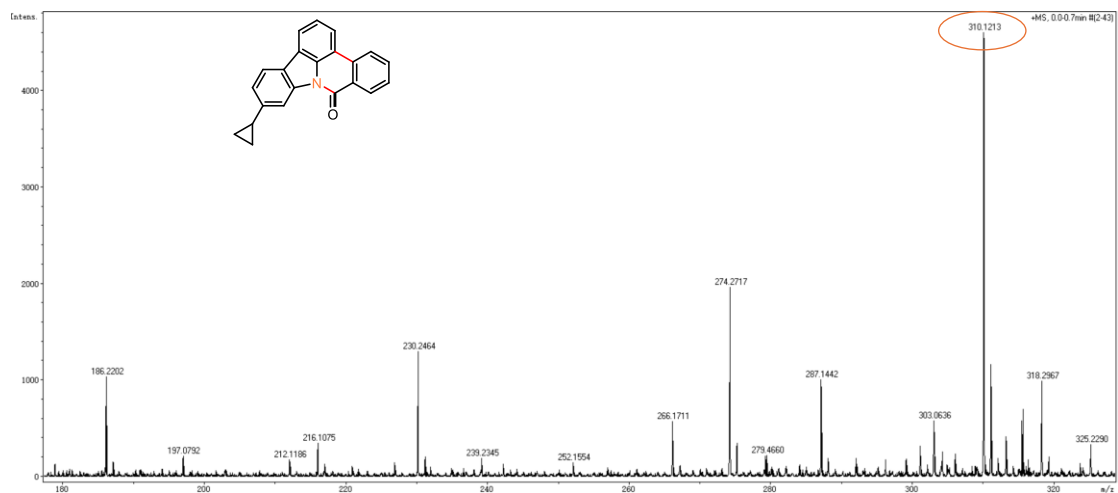

<sup>1</sup>H NMR of **3k** (400 MHz, CDCl<sub>3</sub>)

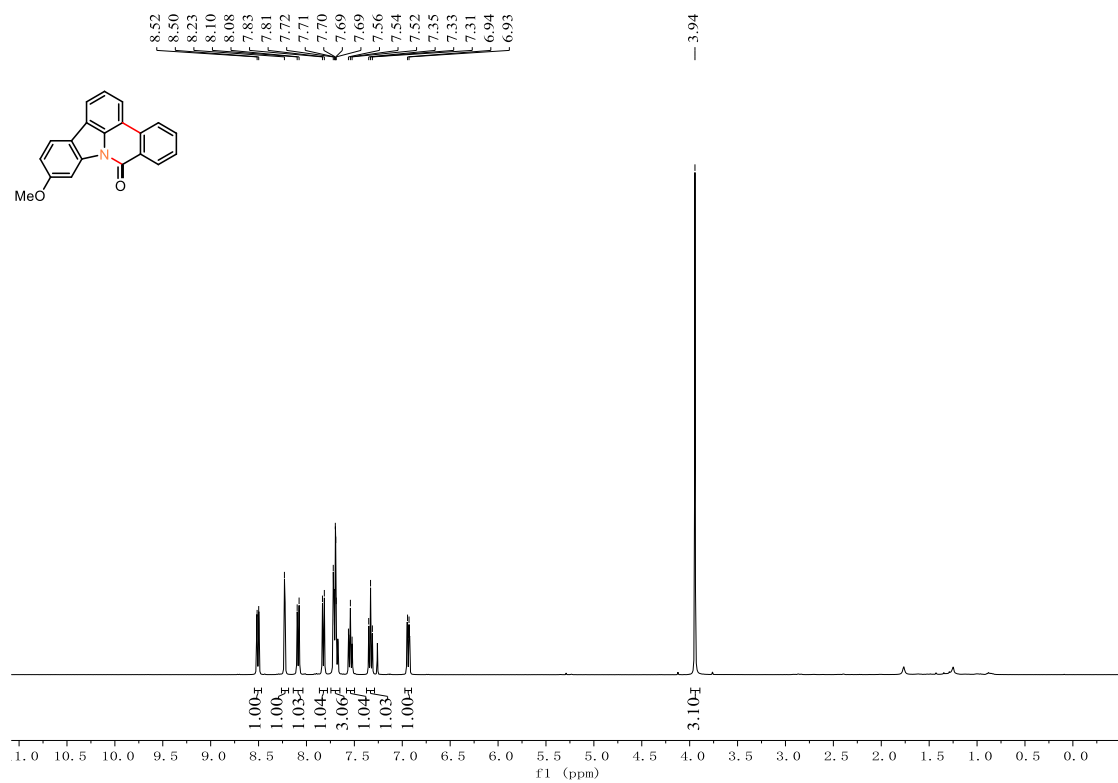



$^{13}\text{C}$  NMR of **3k** (100 MHz,  $\text{CDCl}_3$ )

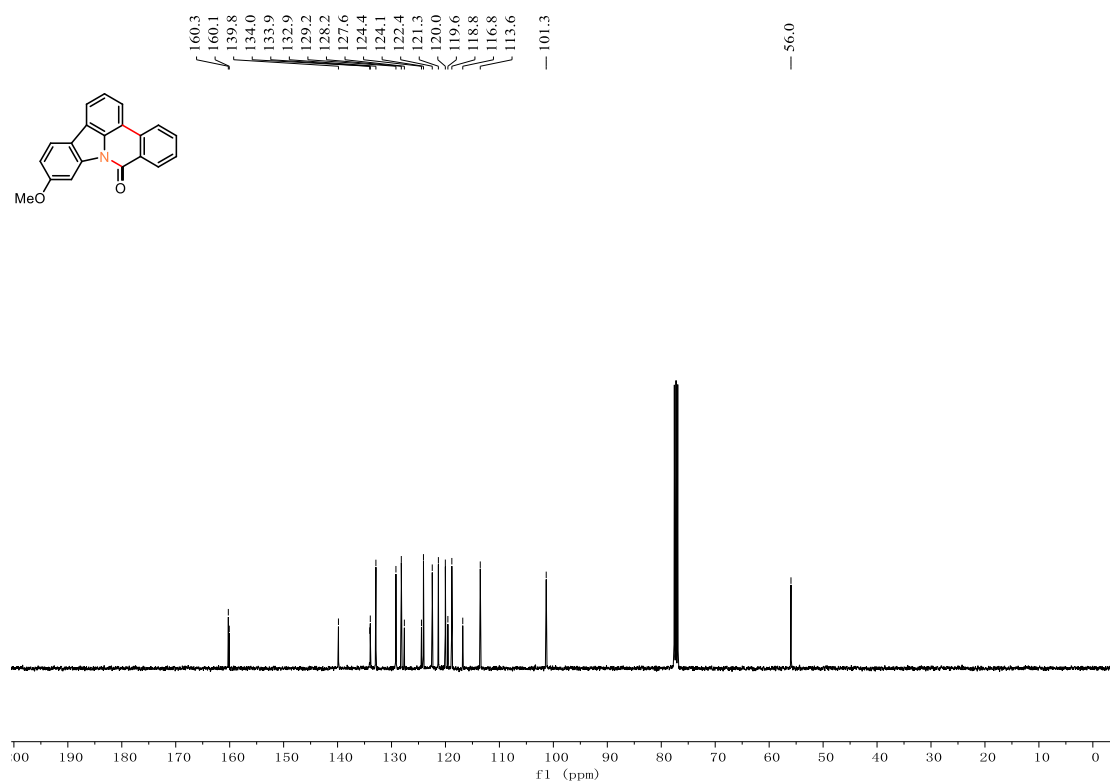

HRMS (ESI)  $m/z$  Calcd for  $\text{C}_{20}\text{H}_{14}\text{NO}_2$   $[\text{M}+\text{H}]^+$  300.1019, found 300.1020.

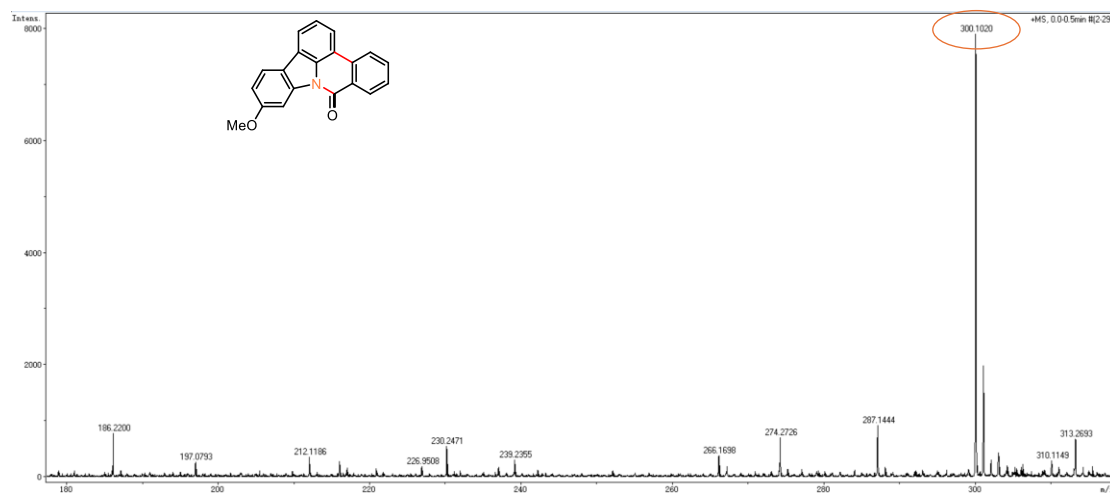

<sup>1</sup>H NMR of **31** (400 MHz, CDCl<sub>3</sub> + CF<sub>3</sub>COOD)

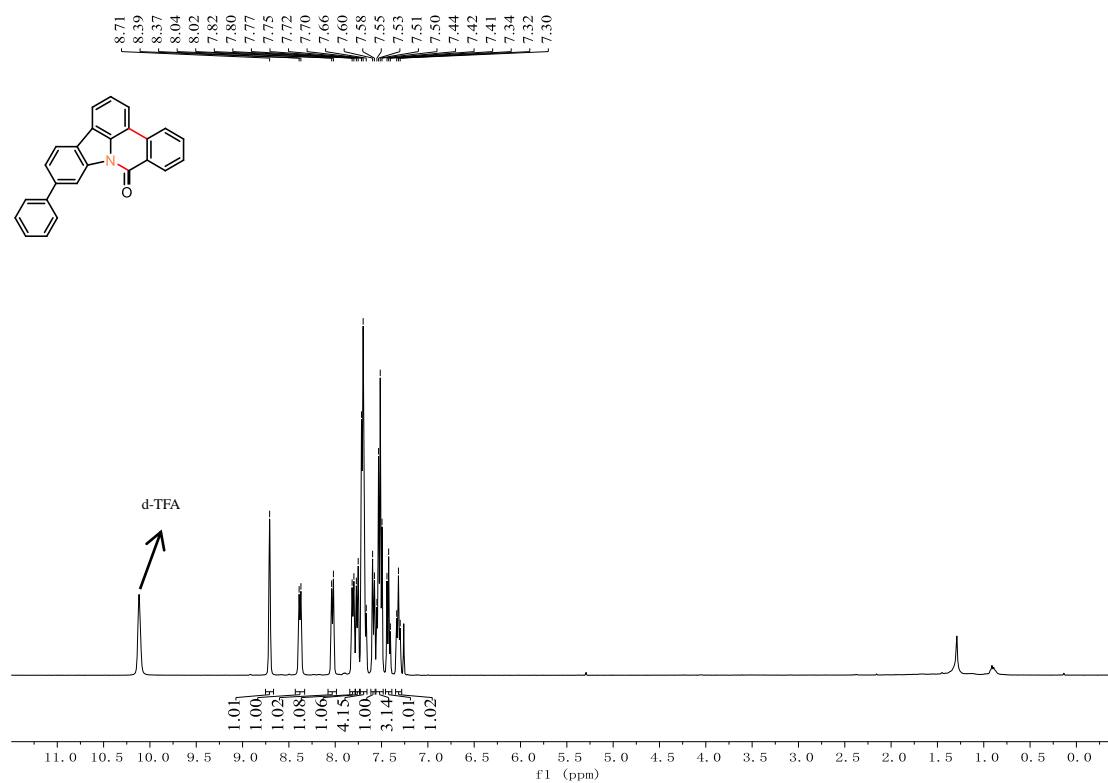

<sup>13</sup>C NMR of **31** (100 MHz, CDCl<sub>3</sub> + CF<sub>3</sub>COOD)

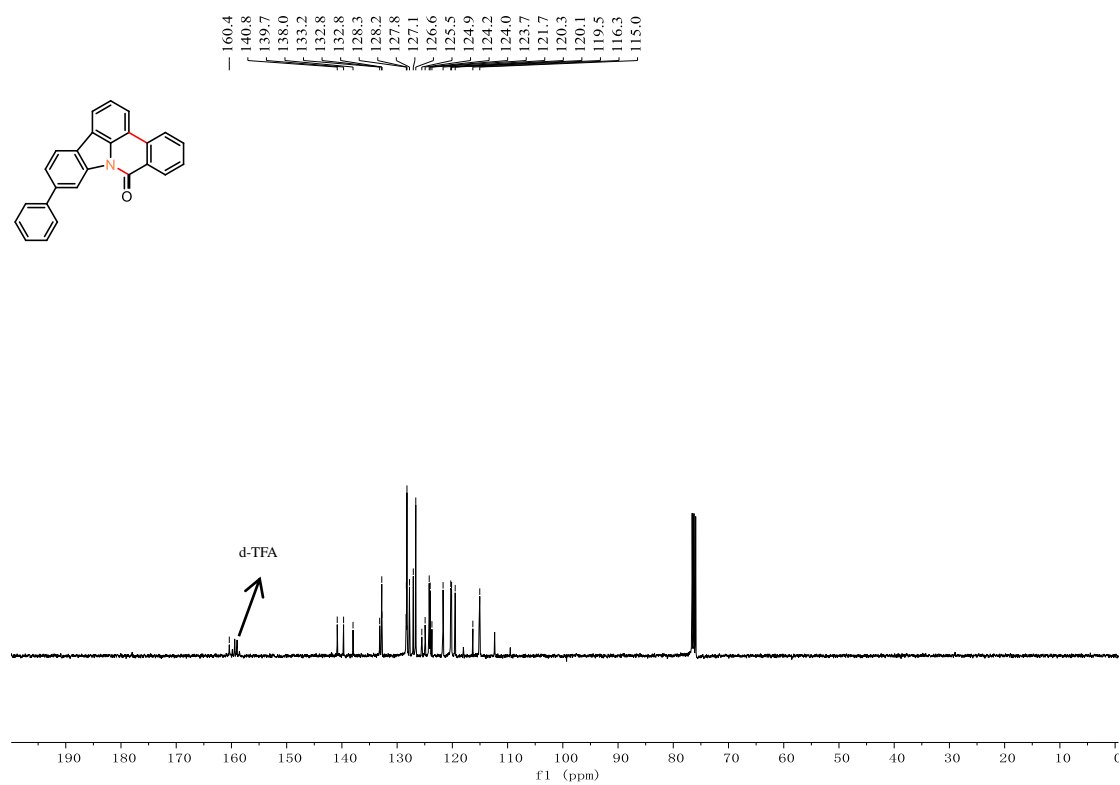

HRMS (ESI)  $m/z$  Calcd for  $C_{25}H_{16}NO$   $[M+H]^+$  346.1226, found 346.1197.

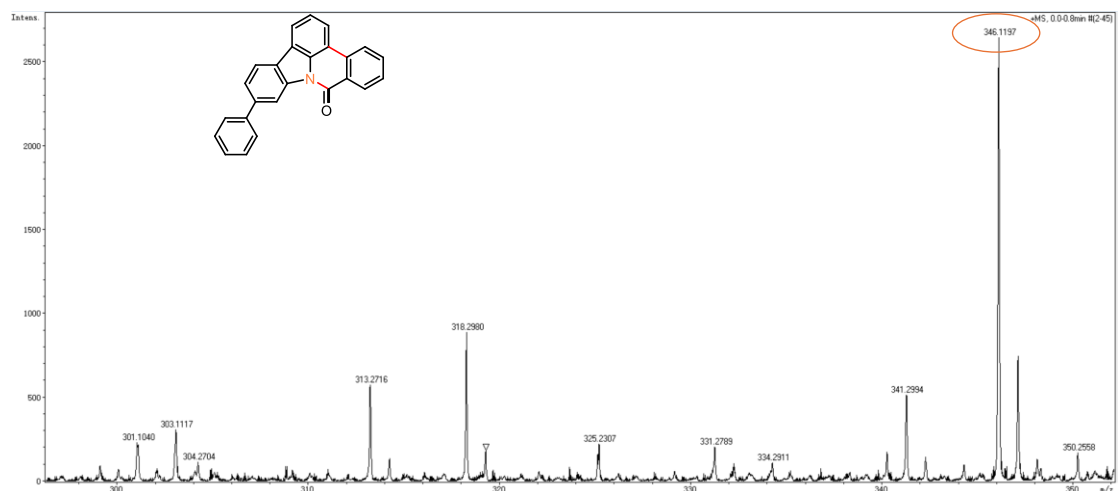

$^1H$  NMR of **3m** (400 MHz,  $CDCl_3$  +  $CF_3COOD$ )

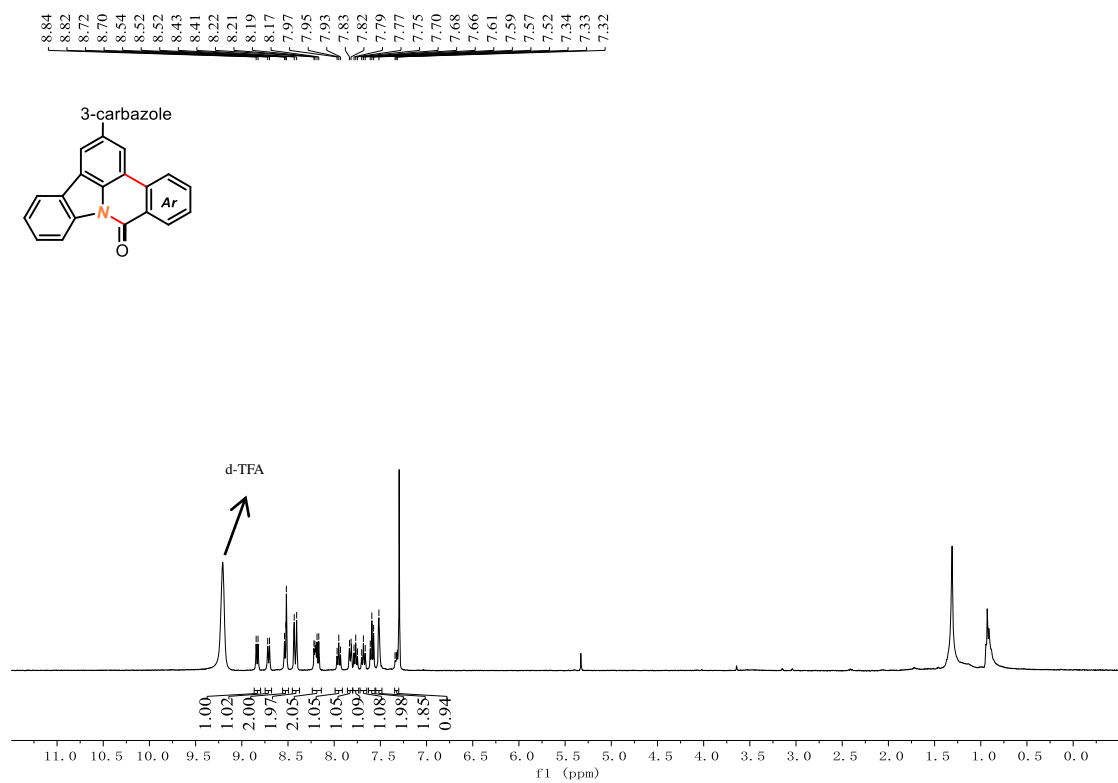

$^{13}\text{C}$  NMR of **3m** (100 MHz,  $\text{CDCl}_3 + \text{CF}_3\text{COOD}$ )

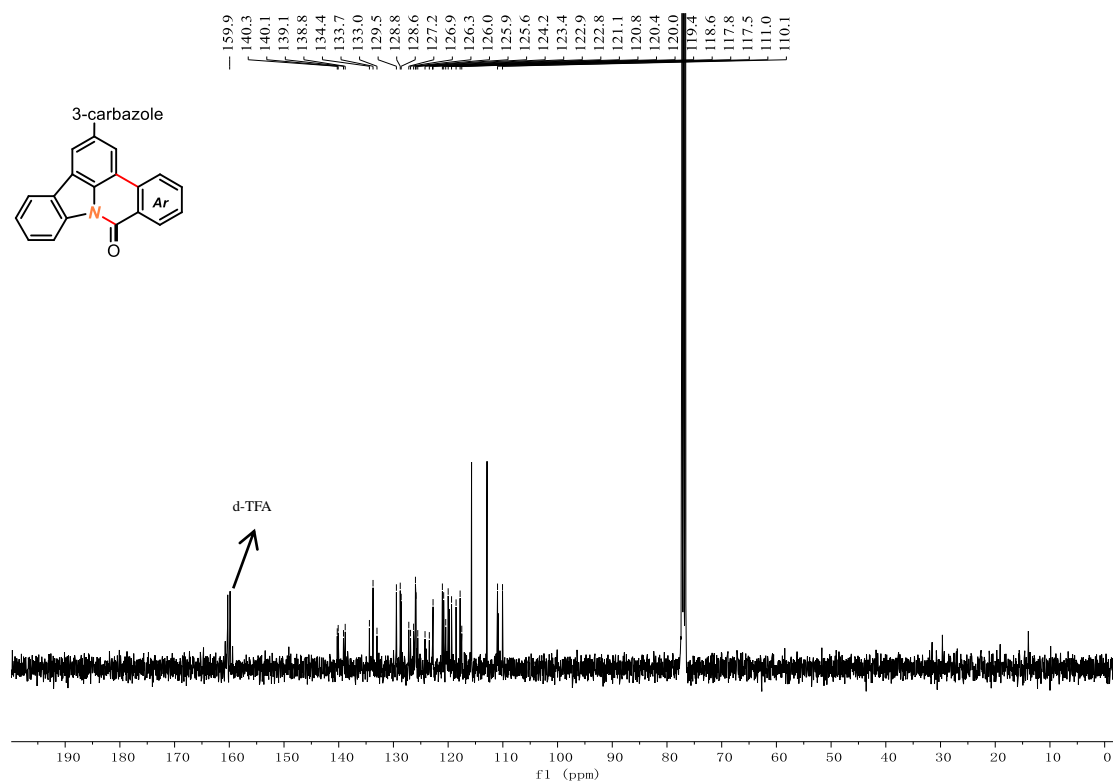

HRMS (ESI)  $m/z$  Calcd for  $\text{C}_{31}\text{H}_{19}\text{N}_2\text{O}$   $[\text{M}+\text{Na}]^+$  457.1311, found 457.1317.

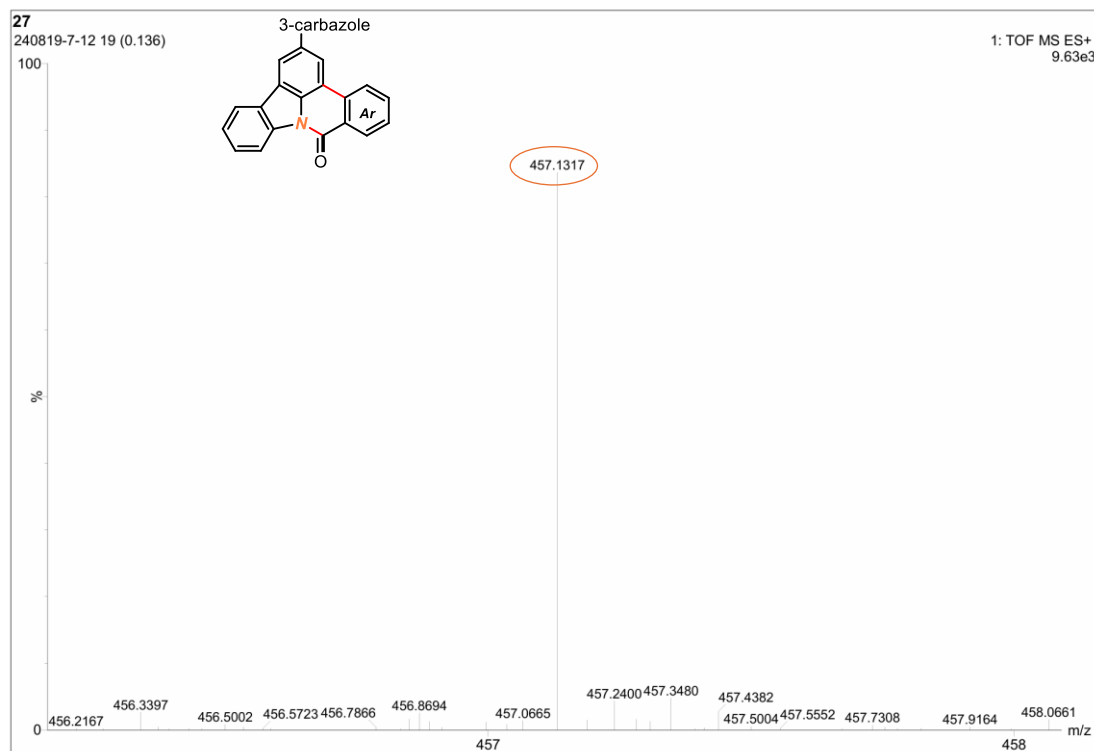

<sup>1</sup>H NMR of **3m'** (400 MHz, CDCl<sub>3</sub> + CF<sub>3</sub>COOD)

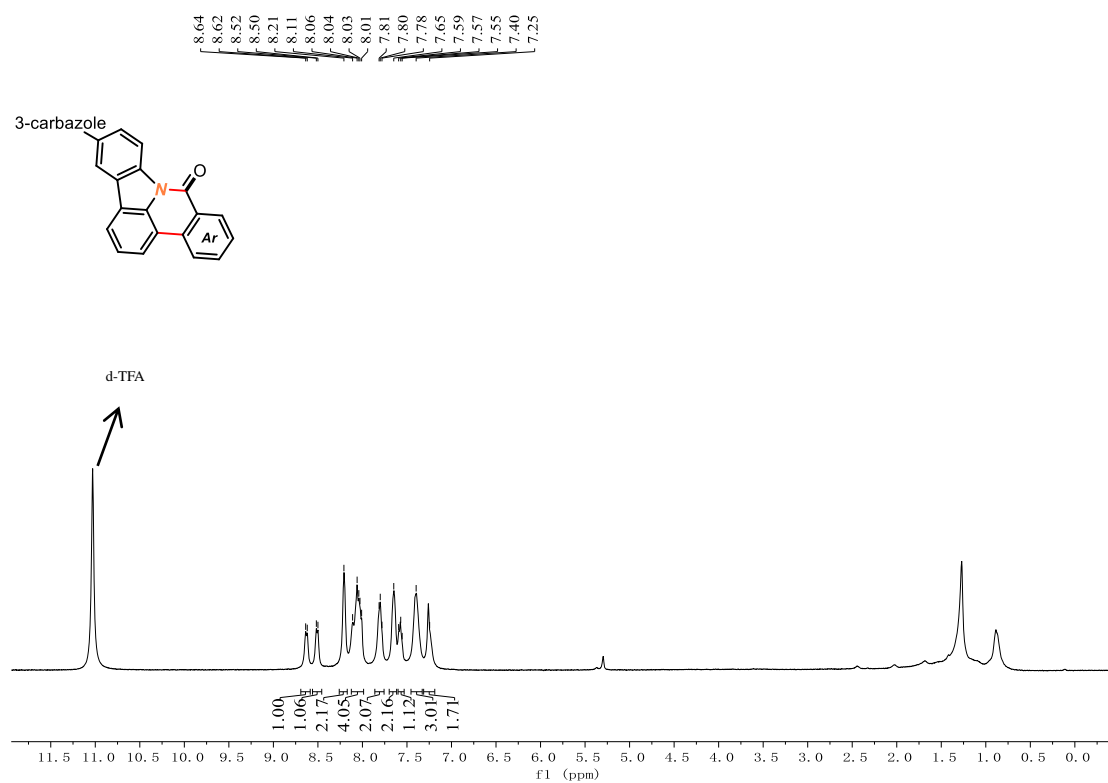

<sup>13</sup>C NMR of **3m'** (100 MHz, CDCl<sub>3</sub> + CF<sub>3</sub>COOD)

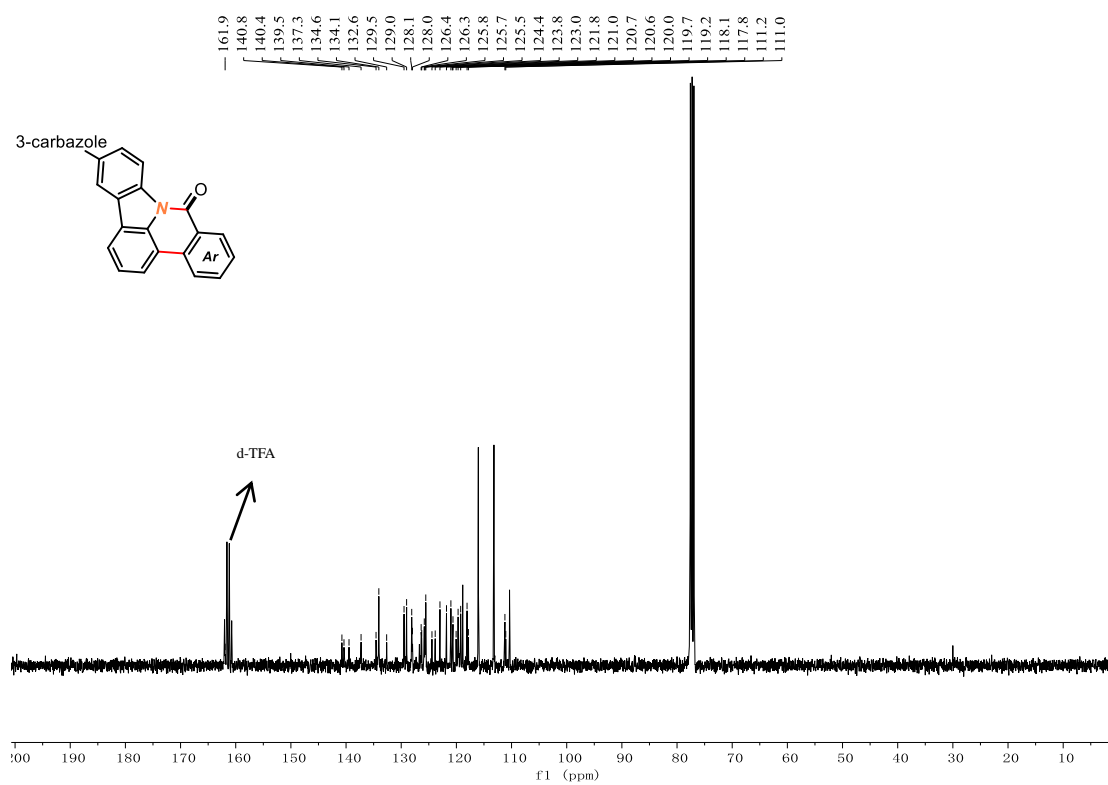

HRMS (ESI)  $m/z$  Calcd for  $C_{31}H_{19}N_2O$   $[M+Na]^+$  457.1311, found 457.1312.

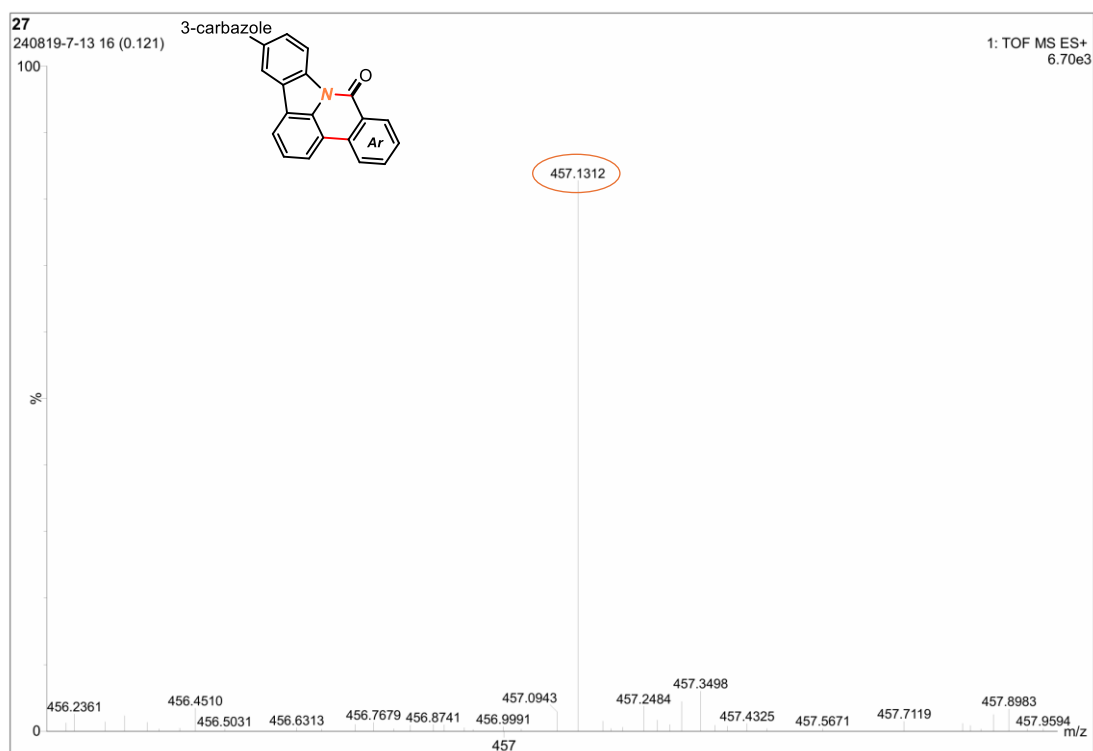

$^1H$  NMR of **3n** (400 MHz,  $CDCl_3$ )

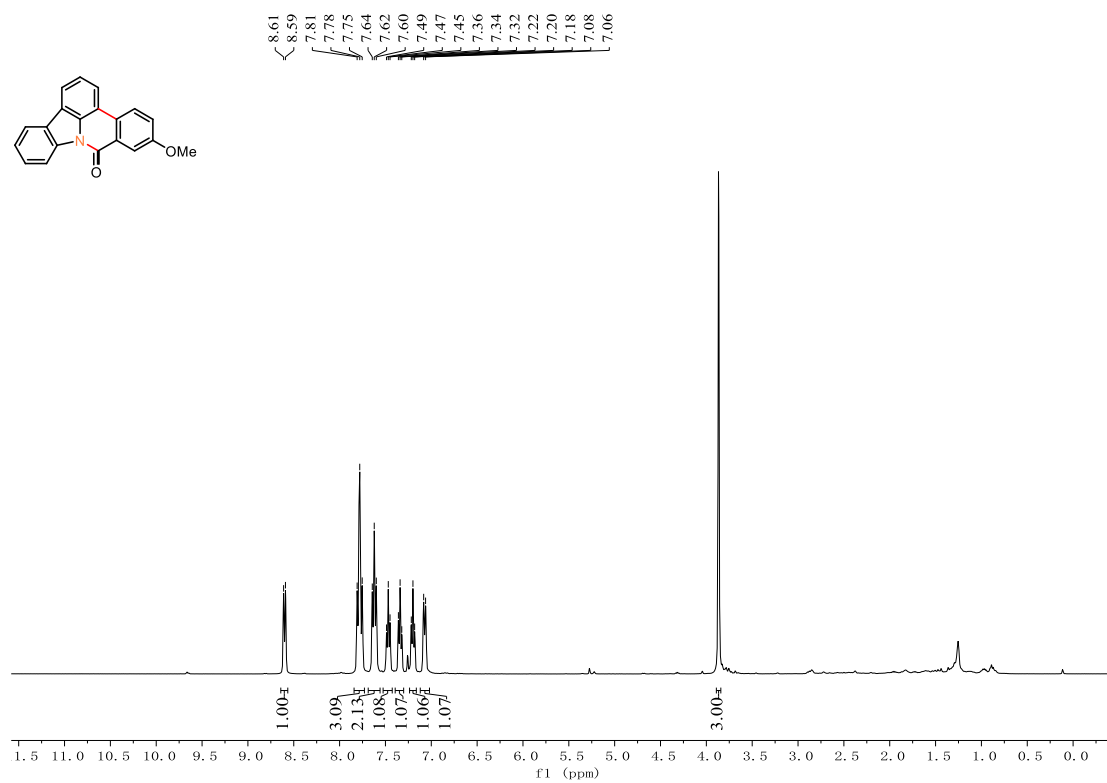

$^{13}\text{C}$  NMR of **3n** (100 MHz,  $\text{CDCl}_3$ )

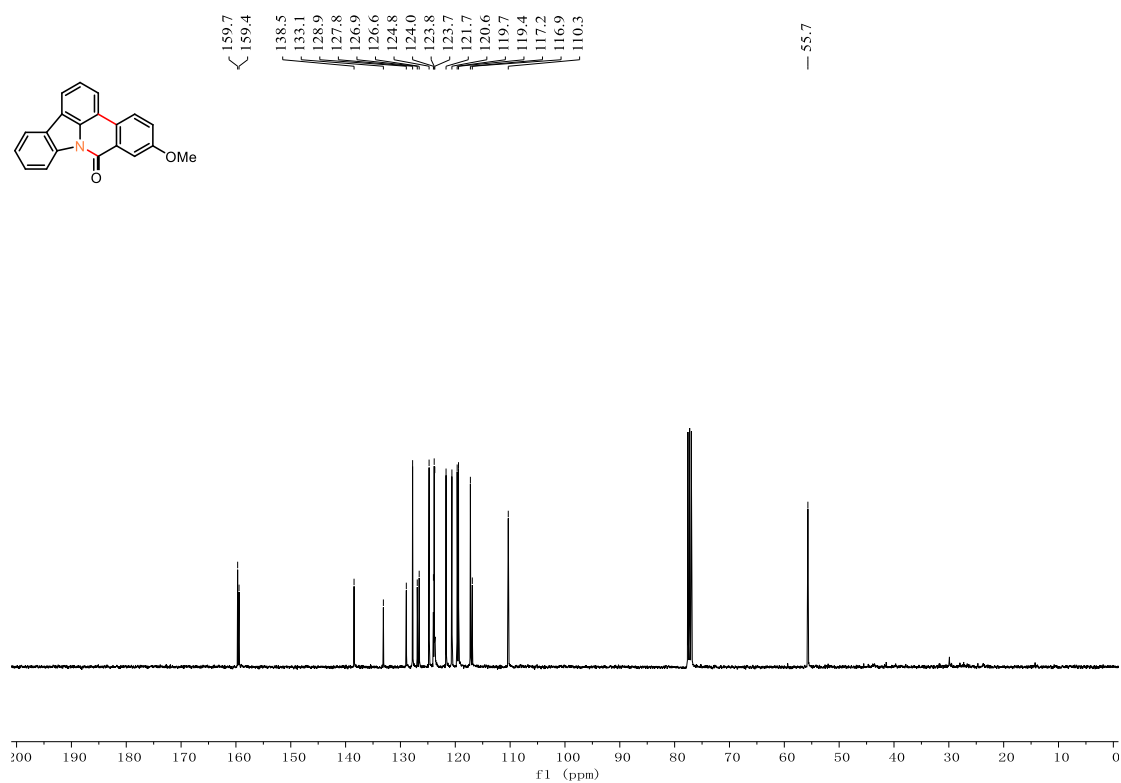

HRMS (ESI)  $m/z$  Calcd for  $\text{C}_{20}\text{H}_{14}\text{NO}_2$   $[\text{M}+\text{Na}]^+$  322.0838, found 322.0840.

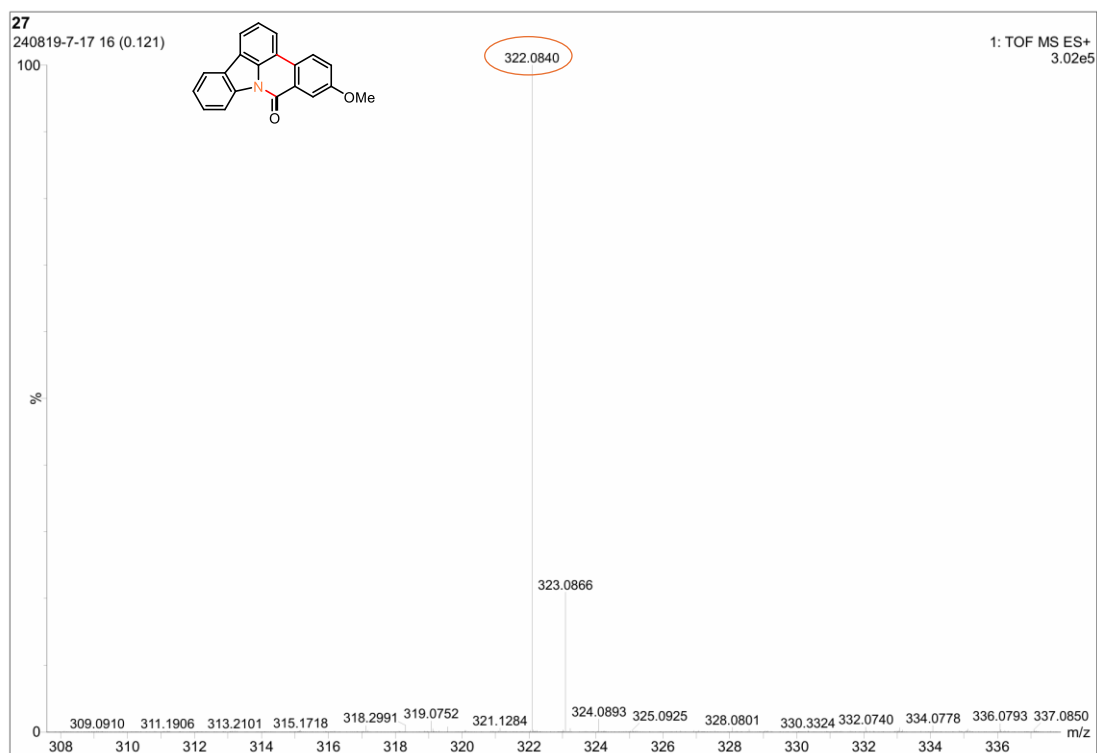

$^1\text{H}$  NMR of **3o** (400 MHz,  $\text{CDCl}_3 + \text{CF}_3\text{COOD}$ )

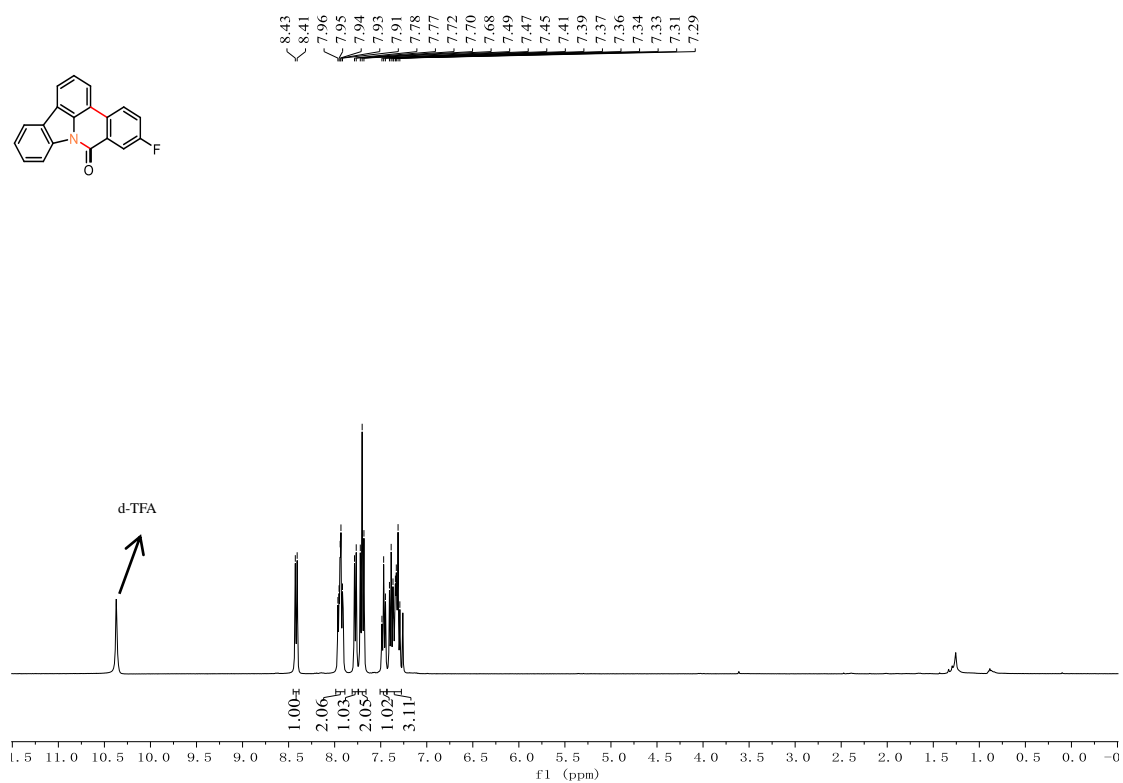

$^{13}\text{C}$  NMR of **3o** (100 MHz,  $\text{CDCl}_3 + \text{CF}_3\text{COOD}$ )

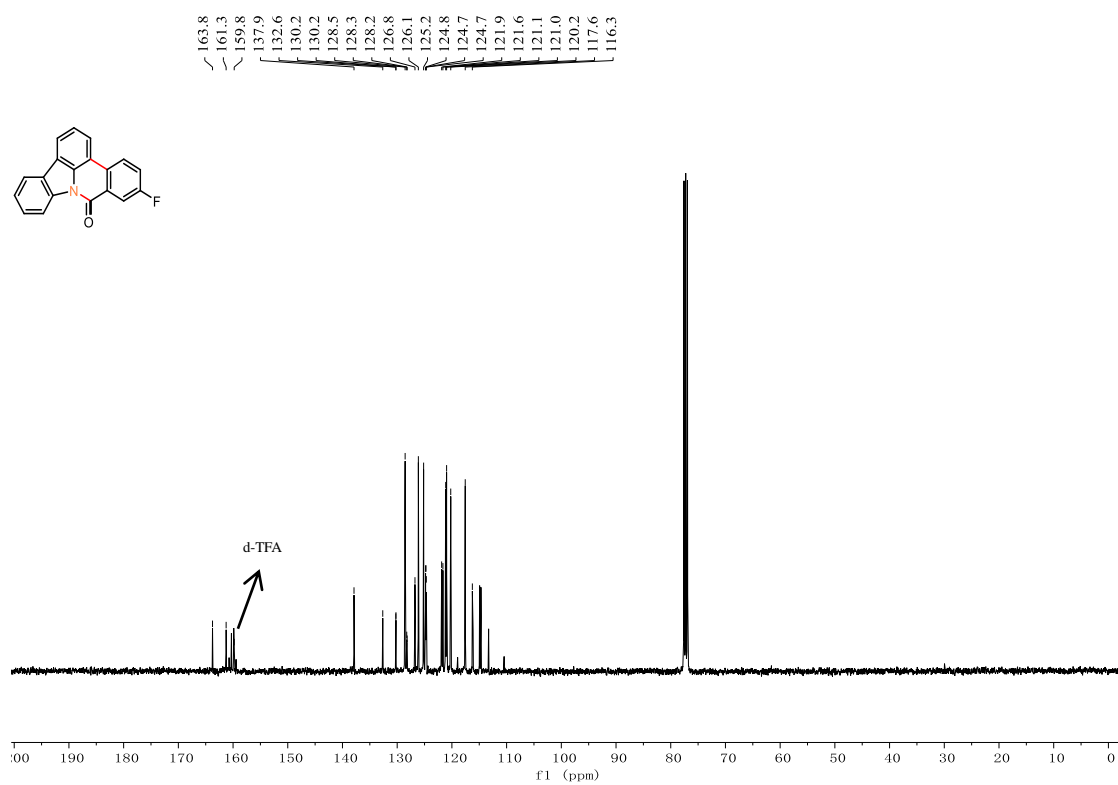



$^{19}\text{F}$  NMR of **3o** (376 MHz,  $\text{CDCl}_3 + \text{CF}_3\text{COOD}$ )

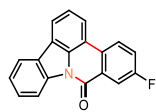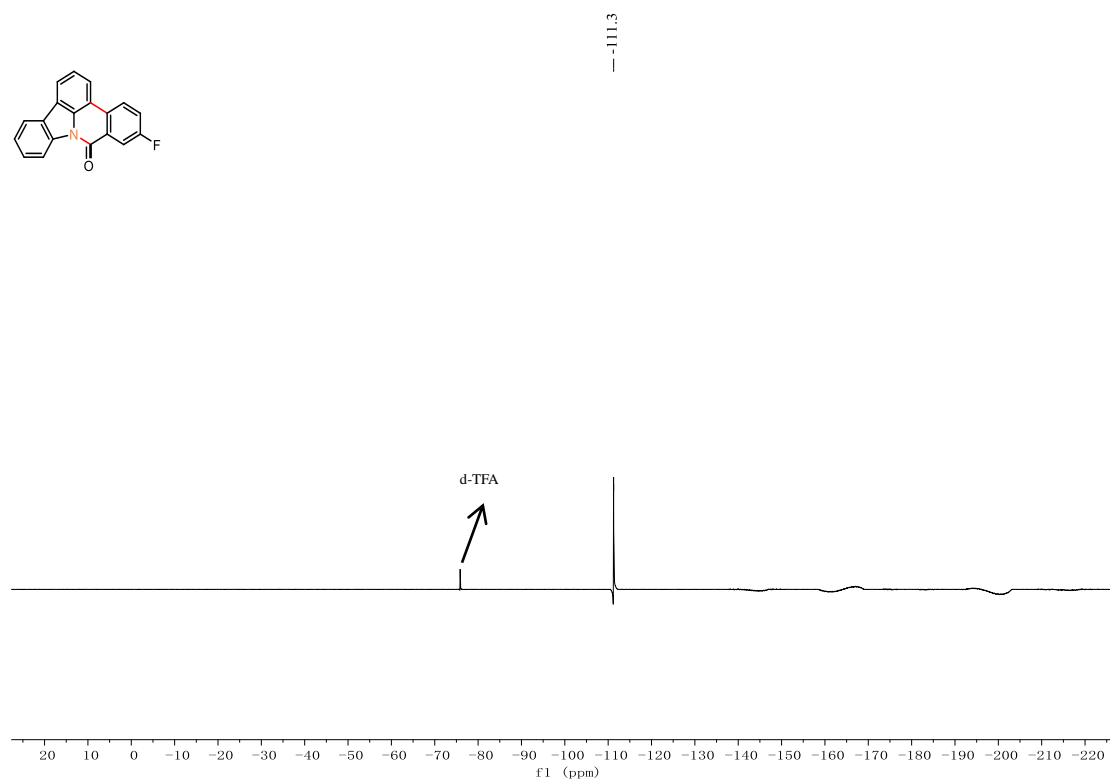

HRMS (ESI)  $m/z$  Calcd for  $\text{C}_{19}\text{H}_{11}\text{FNO}$   $[\text{M}+\text{H}]^+$  288.0819, found 288.0822.

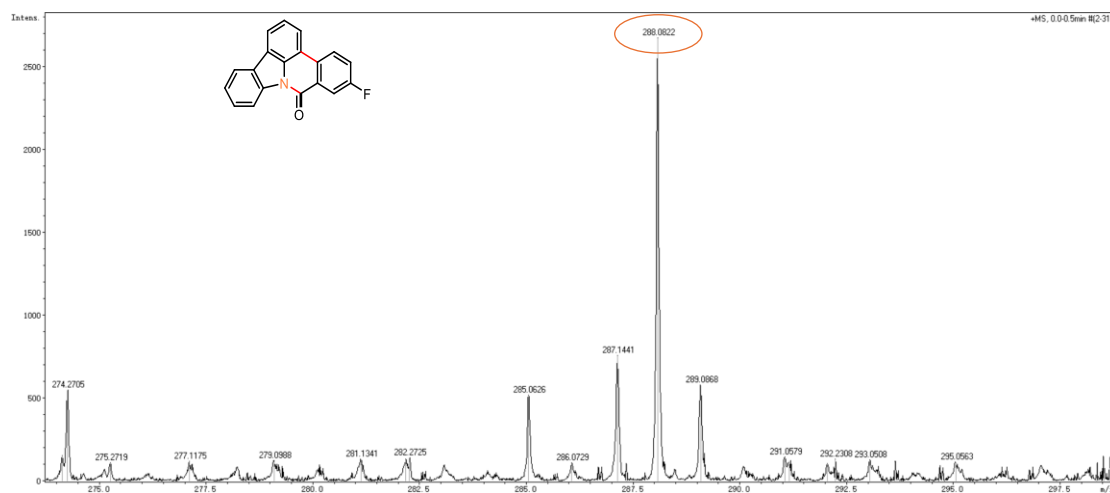

<sup>1</sup>H NMR of **3p** (400 MHz, CDCl<sub>3</sub> + CF<sub>3</sub>COOD)

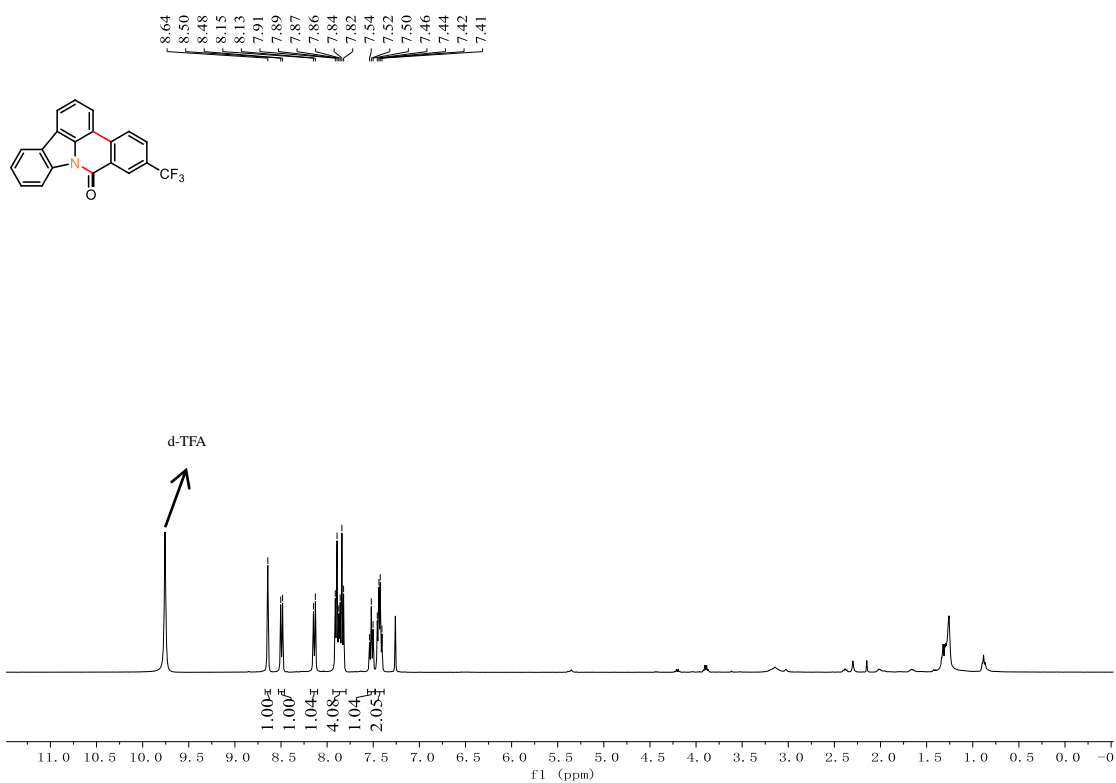

<sup>13</sup>C NMR of **3p** (100 MHz, CDCl<sub>3</sub> + CF<sub>3</sub>COOD)

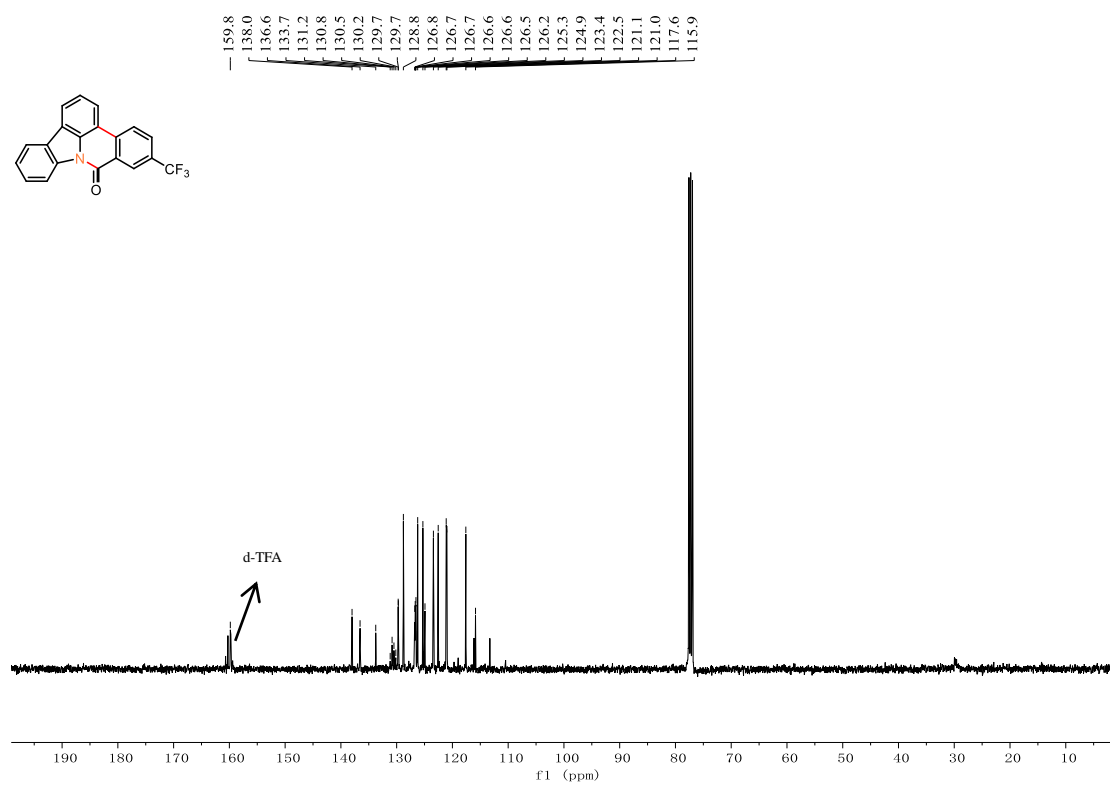

$^{19}\text{F}$  NMR of **3p** (376 MHz,  $\text{CDCl}_3 + \text{CF}_3\text{COOD}$ )

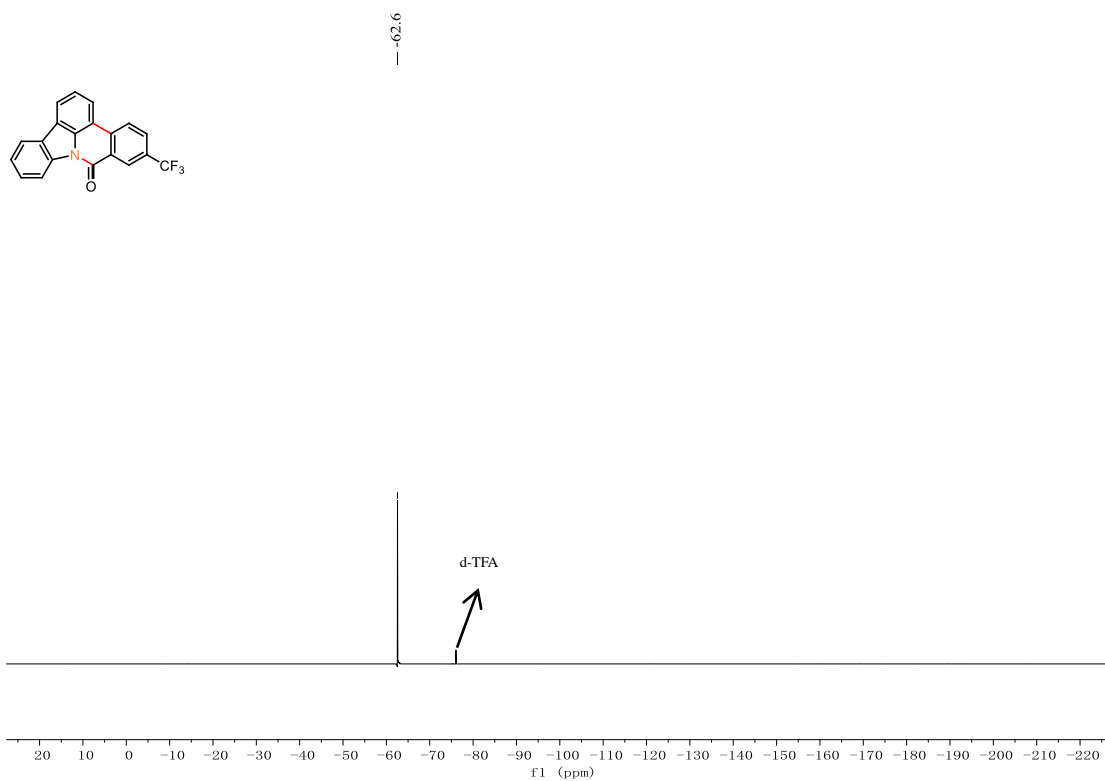

HRMS (ESI)  $m/z$  Calcd for  $\text{C}_{20}\text{H}_{11}\text{F}_3\text{NO}$   $[\text{M}+\text{H}]^+$  338.0787, found 338.0777.

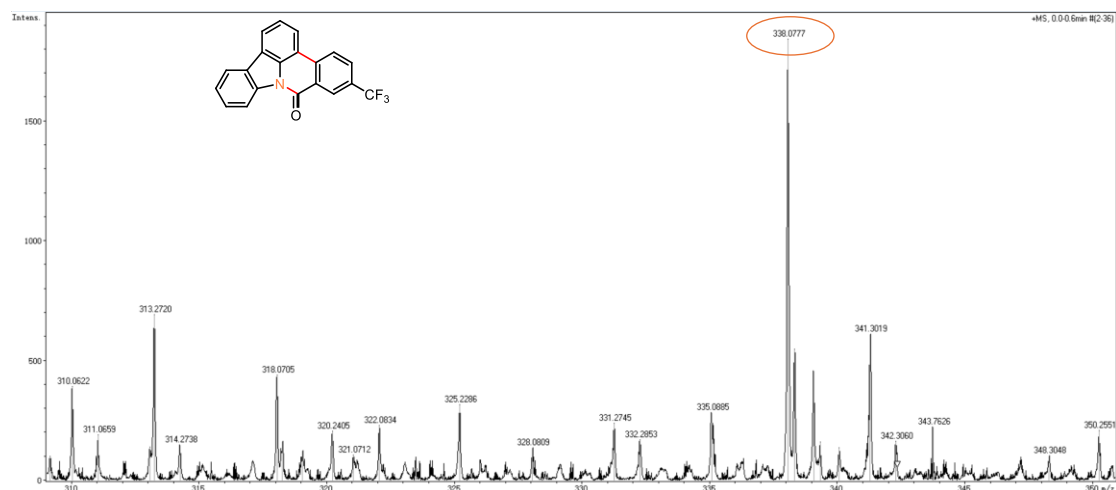

<sup>1</sup>H NMR of **3q** (400 MHz, CDCl<sub>3</sub>)

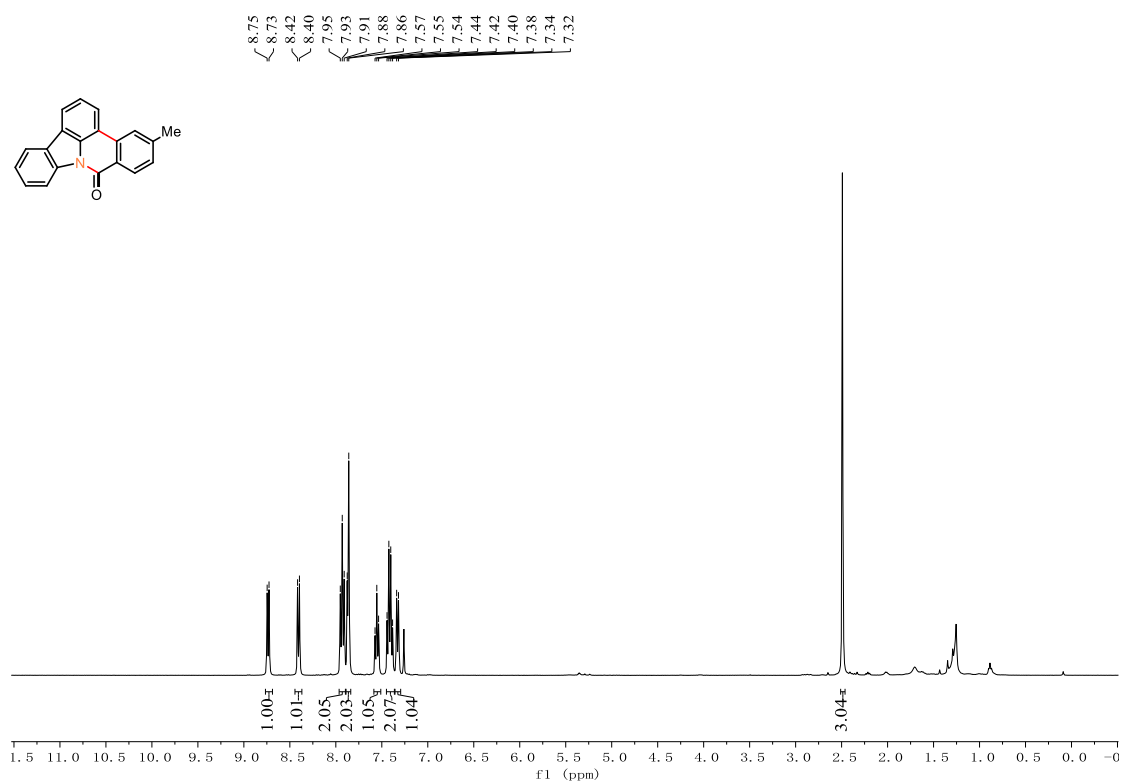

<sup>13</sup>C NMR of **3q** (100 MHz, CDCl<sub>3</sub>)

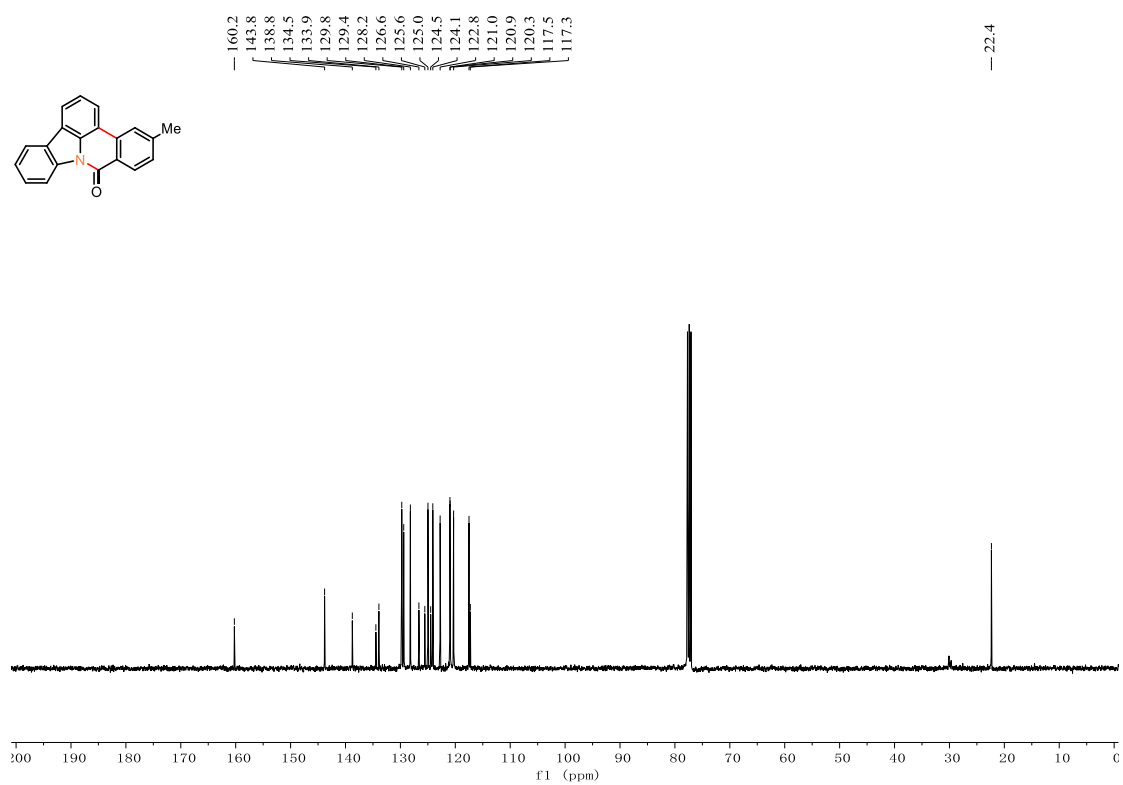

HRMS (ESI)  $m/z$  Calcd for  $C_{20}H_{14}NO$   $[M+H]^+$  284.1070, found 284.1055.

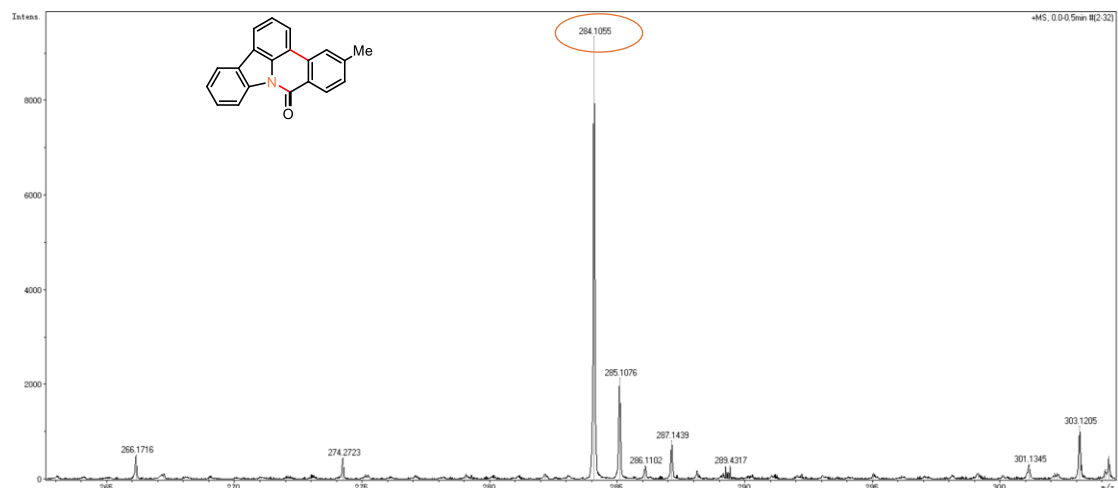

$^1H$  NMR of **3r** (400 MHz,  $CDCl_3 + CF_3COOD$ )

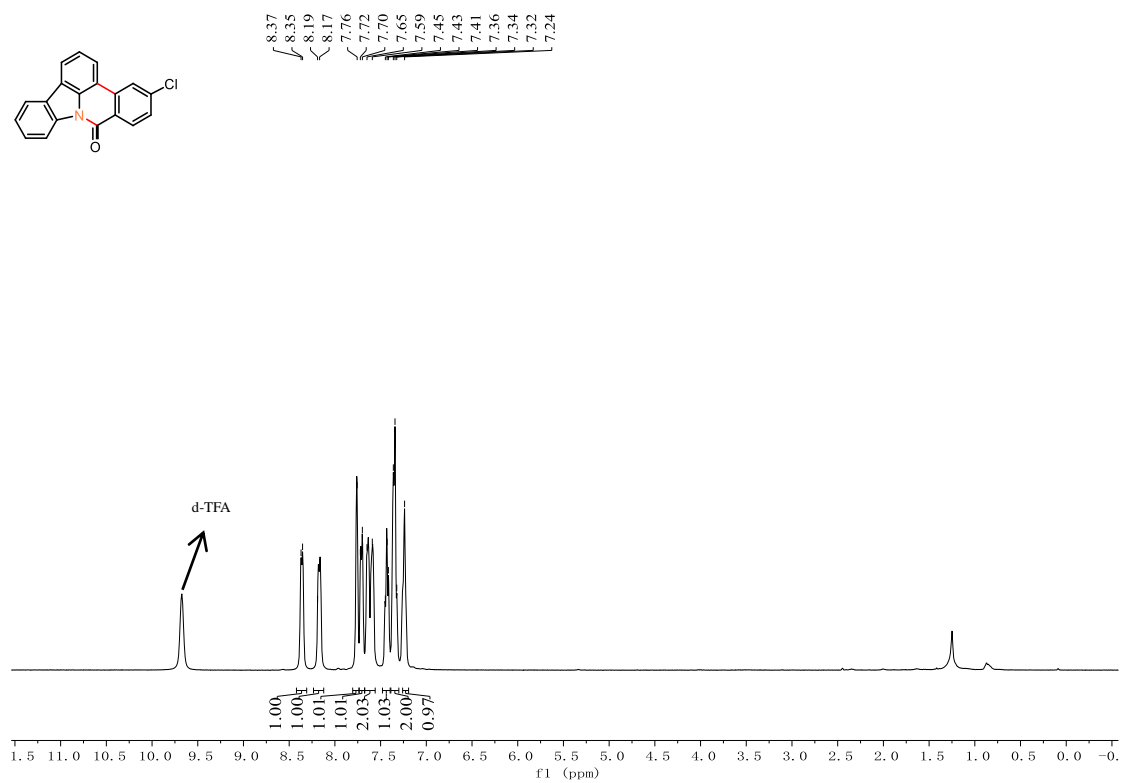

$^{13}\text{C}$  NMR of **3r** (100 MHz,  $\text{CDCl}_3 + \text{CF}_3\text{COOD}$ )

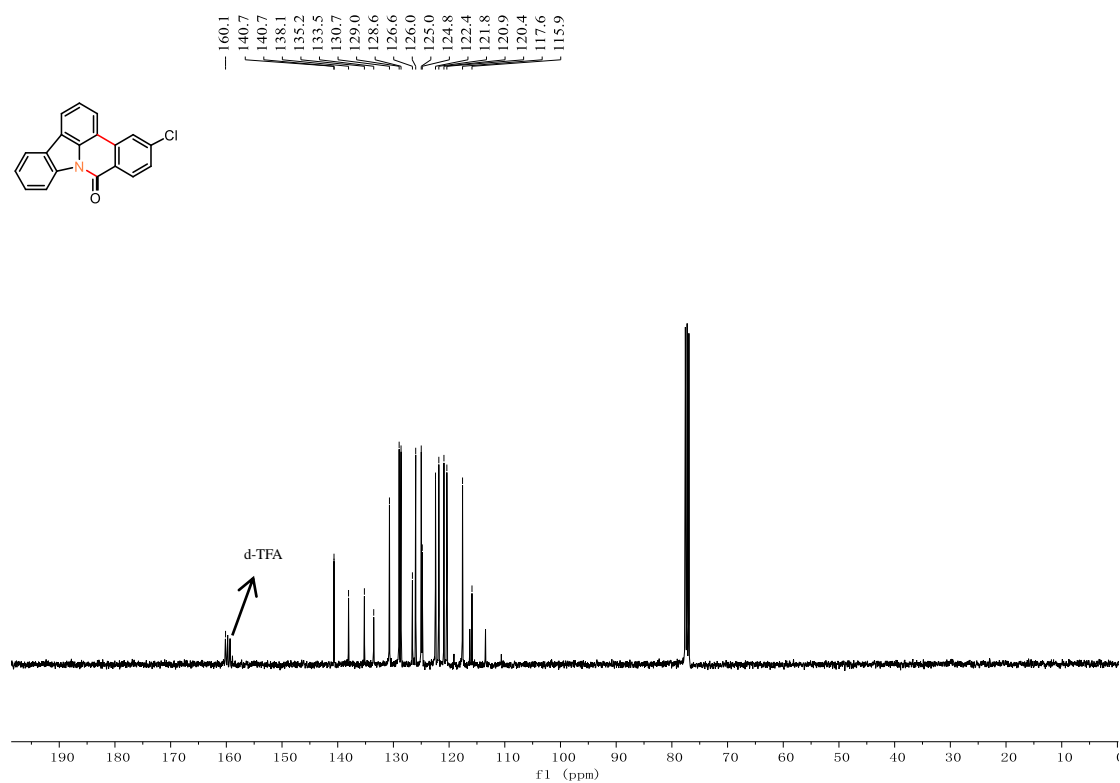

HRMS (ESI)  $m/z$  Calcd for  $\text{C}_{19}\text{H}_{11}\text{ClNO}$   $[\text{M}+\text{H}]^+$  304.0524, found 304.0508.

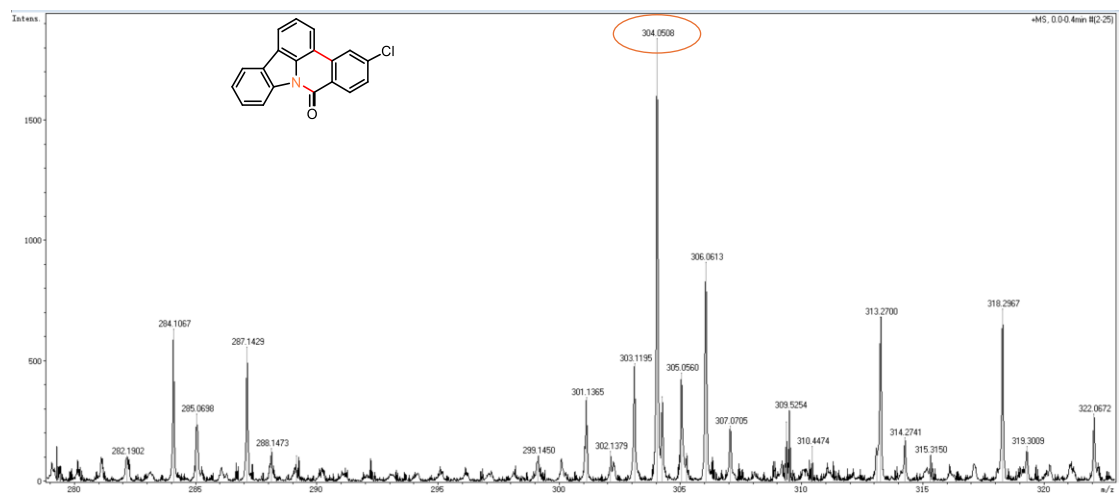

<sup>1</sup>H NMR of **3s** (400 MHz, CDCl<sub>3</sub>)

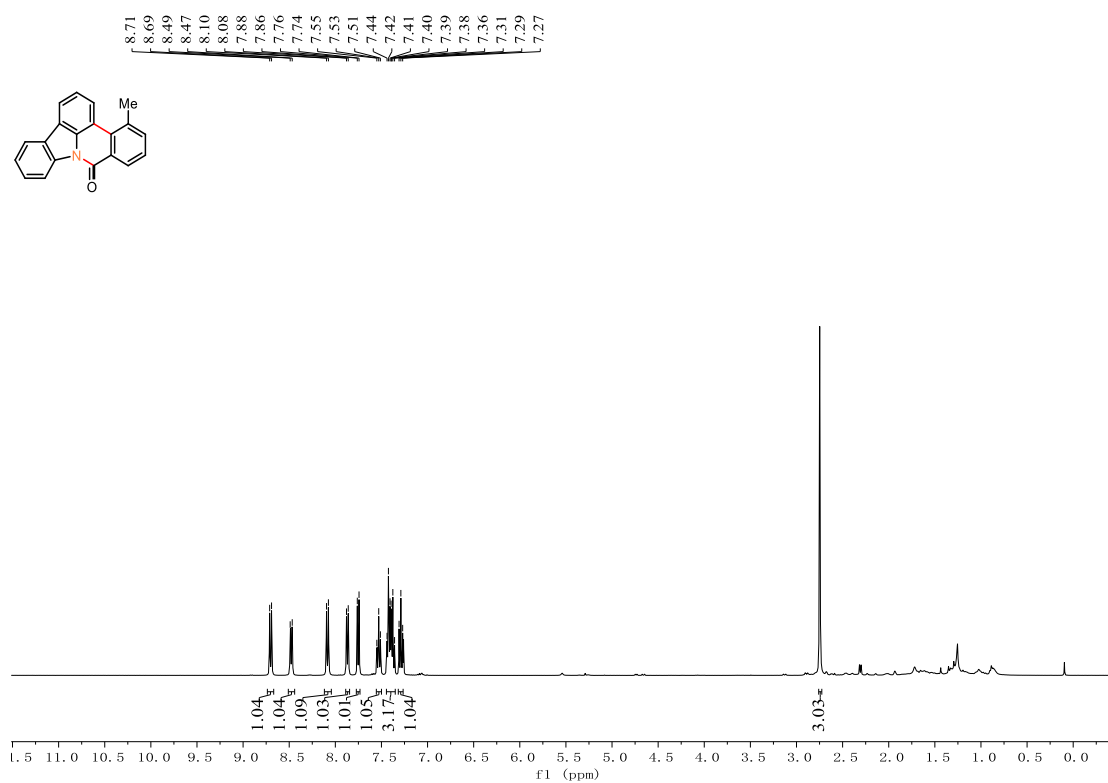

<sup>13</sup>C NMR of **3s** (100 MHz, CDCl<sub>3</sub>)

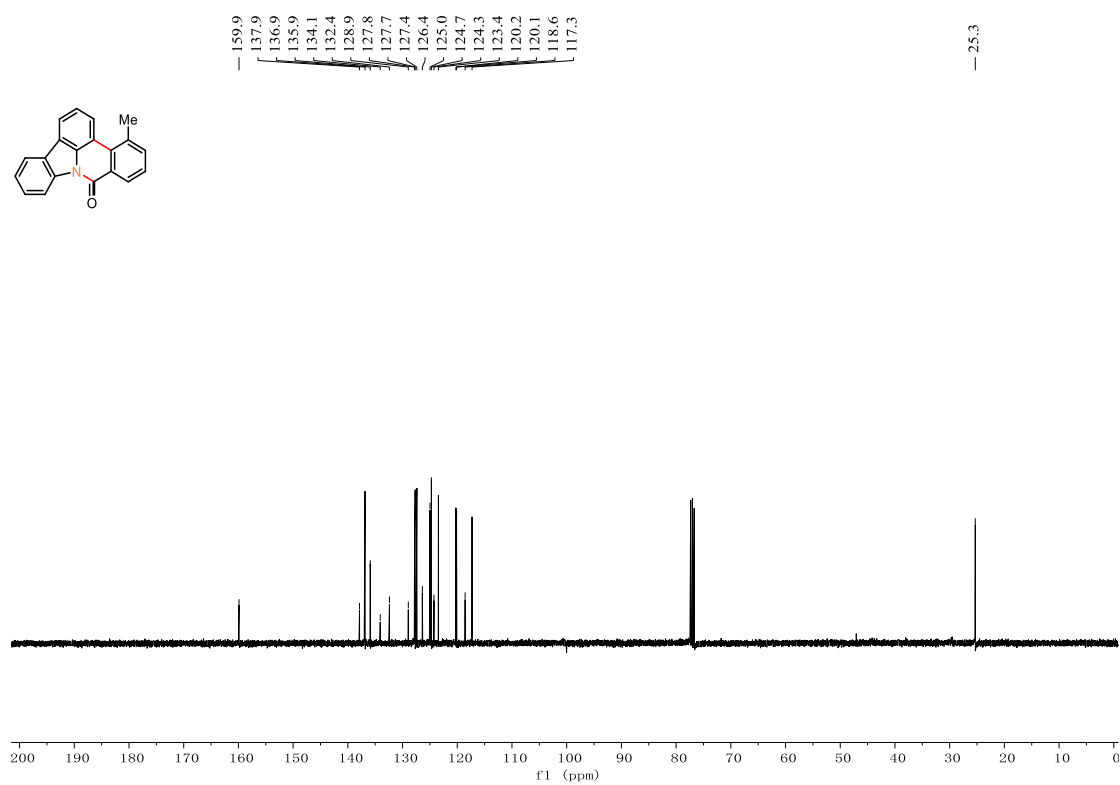

HRMS (ESI)  $m/z$  Calcd for  $C_{20}H_{14}NO$   $[M+H]^+$  284.1070, found 284.1055.

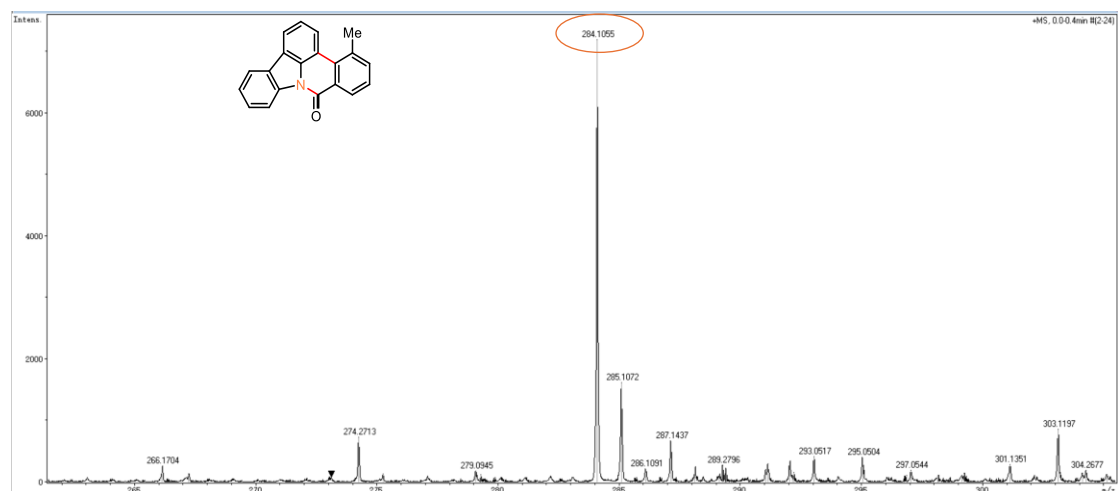

$^1H$  NMR of **3t** (400 MHz,  $CDCl_3 + CF_3COOD$ )

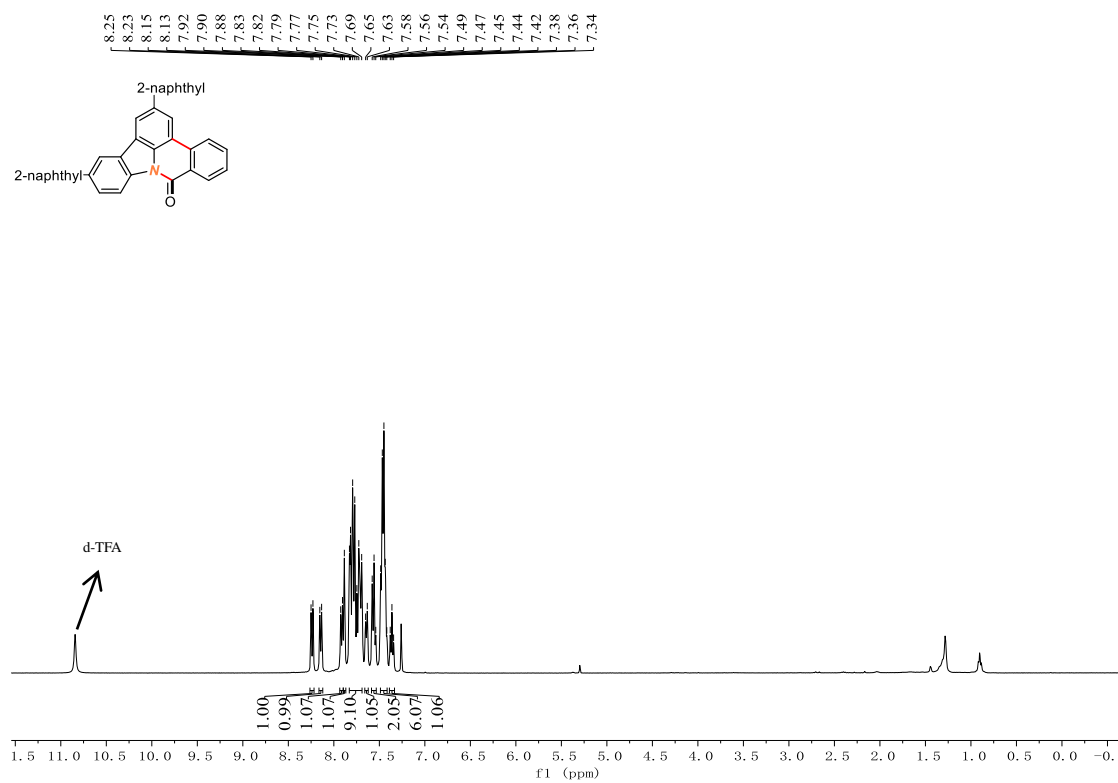



$^{13}\text{C}$  NMR of **3t** (100 MHz,  $\text{CDCl}_3 + \text{CF}_3\text{COOD}$ )

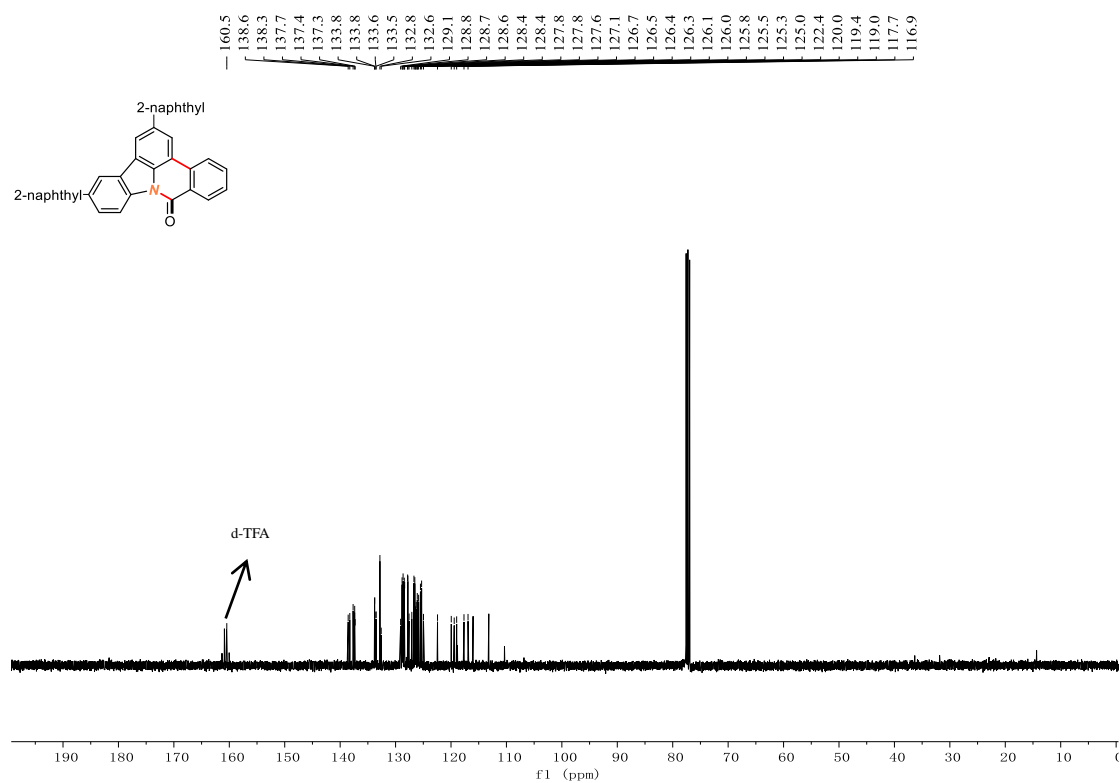

HRMS (ESI)  $m/z$  Calcd for  $\text{C}_{39}\text{H}_{23}\text{NO}$   $[\text{M}+\text{Na}]^+$  544.1672, found 544.1665.

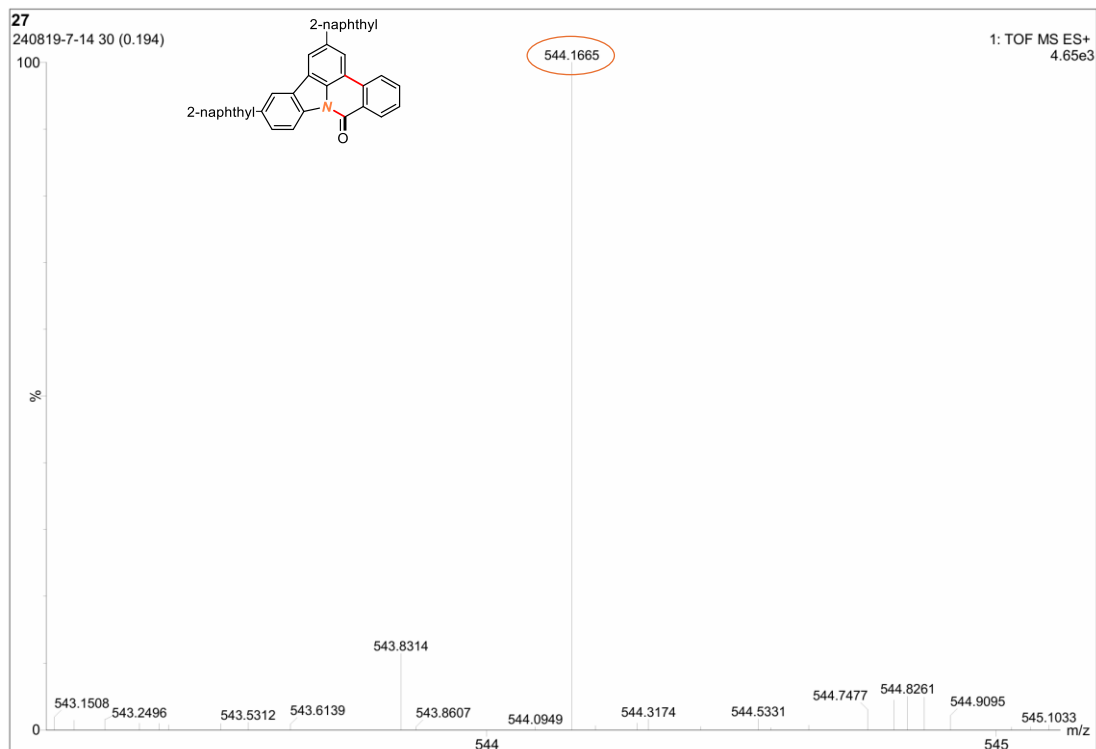

<sup>1</sup>H NMR of **3u** (400 MHz, CDCl<sub>3</sub> + CF<sub>3</sub>COOD)

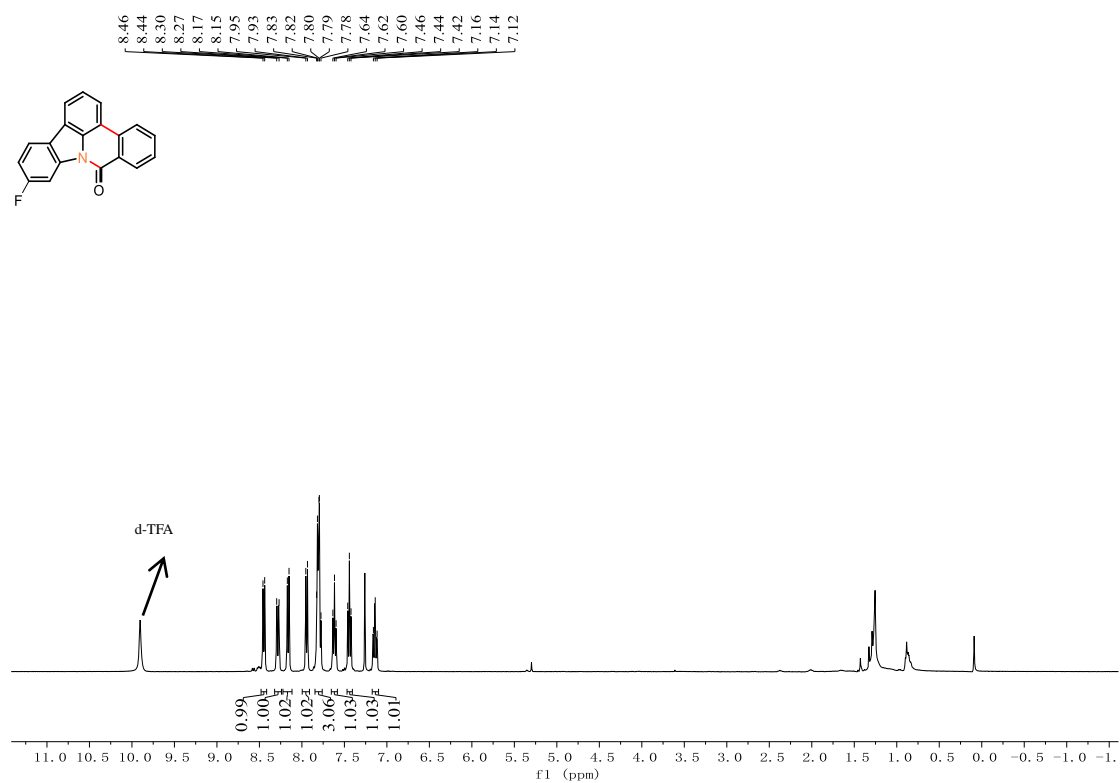

<sup>13</sup>C NMR of **3u** (100 MHz, CDCl<sub>3</sub> + CF<sub>3</sub>COOD)

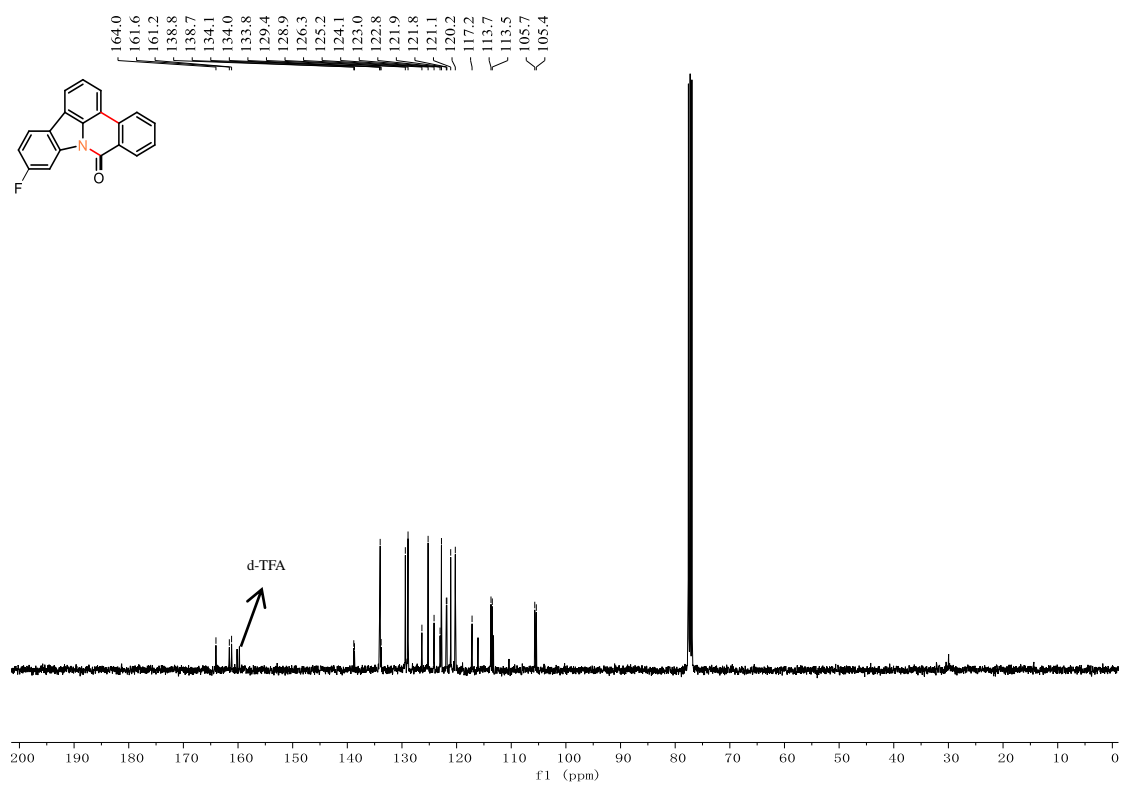

$^{19}\text{F}$  NMR of **3u** (376 MHz,  $\text{CDCl}_3 + \text{CF}_3\text{COOD}$ )

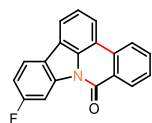

-111.5

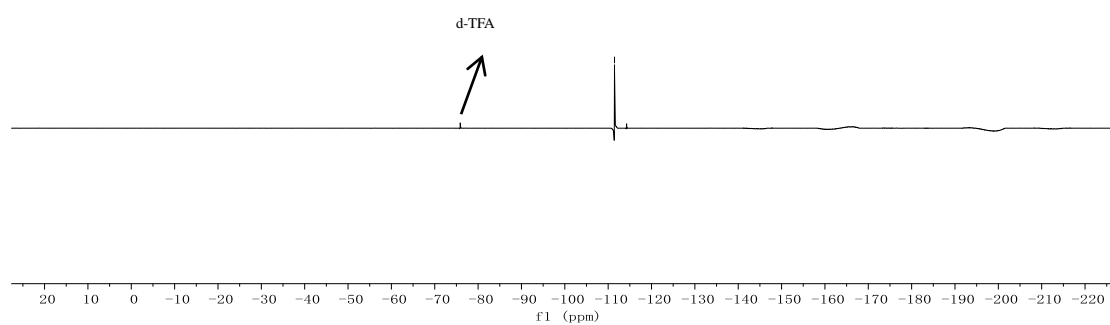

HRMS (ESI)  $m/z$  Calcd for  $\text{C}_{19}\text{H}_{11}\text{FNO}$   $[\text{M}+\text{Na}]^+$  310.0639, found 310.0632.

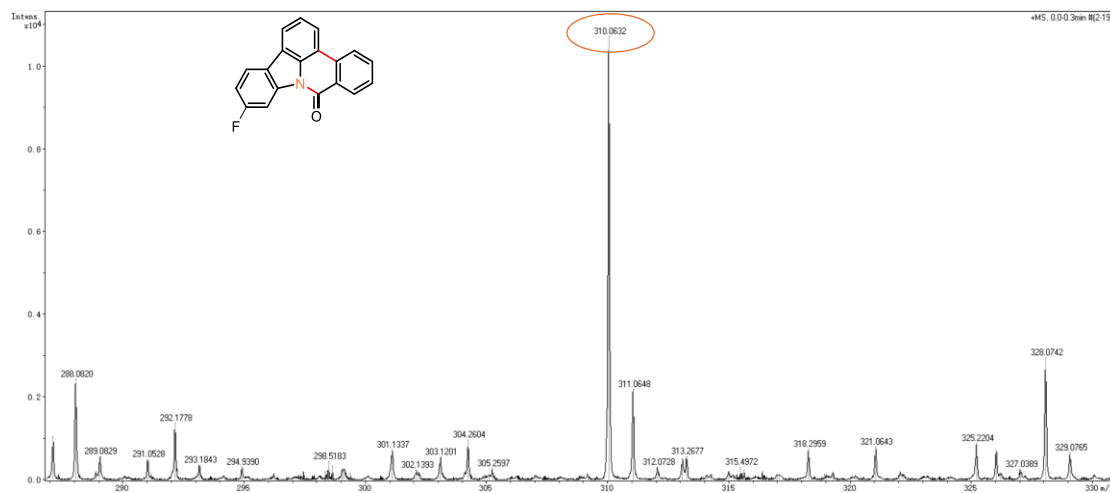

<sup>1</sup>H NMR of **3u'** (400 MHz, CDCl<sub>3</sub>)

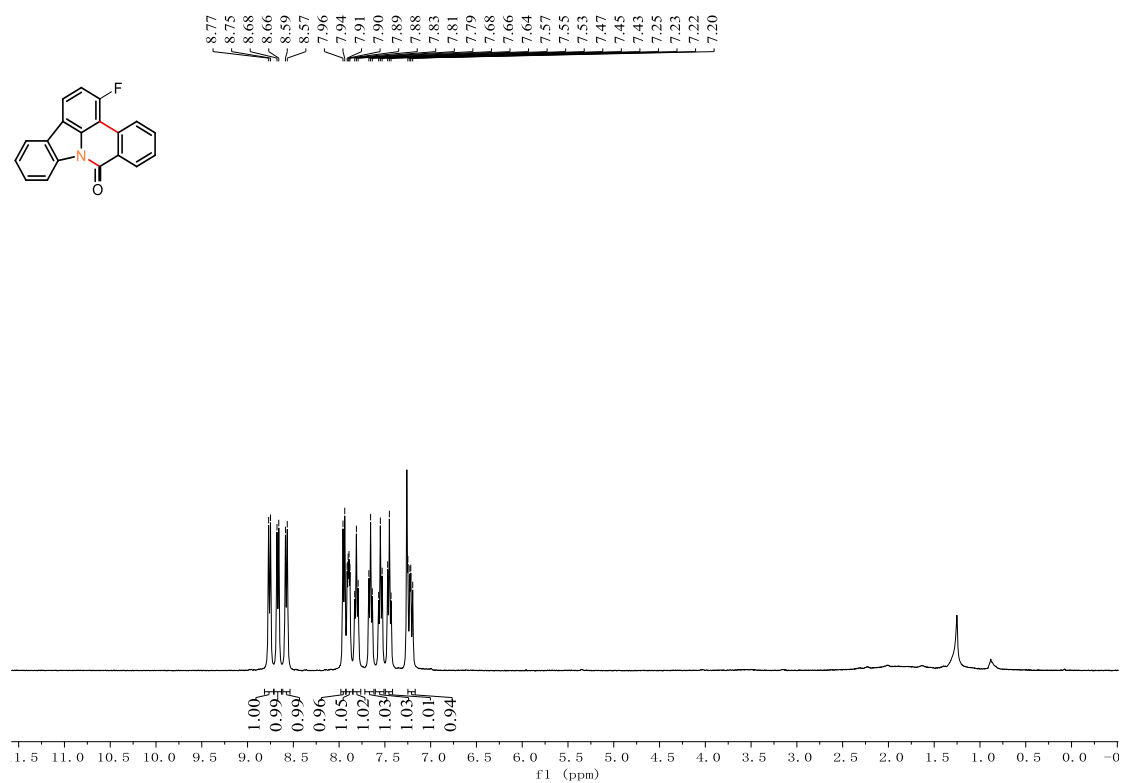

<sup>13</sup>C NMR of **3u'** (100 MHz, CDCl<sub>3</sub>)

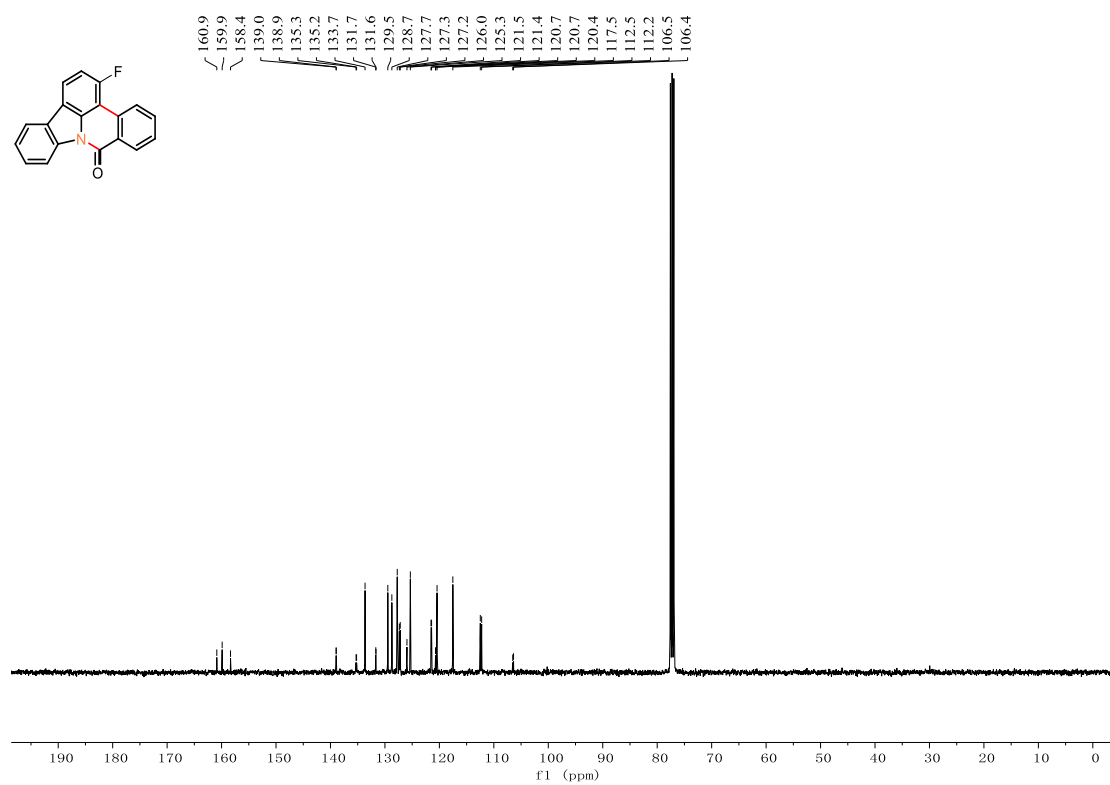

$^{19}\text{F}$  NMR of **3u'** (376 MHz,  $\text{CDCl}_3$ )

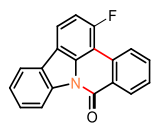

-114.2

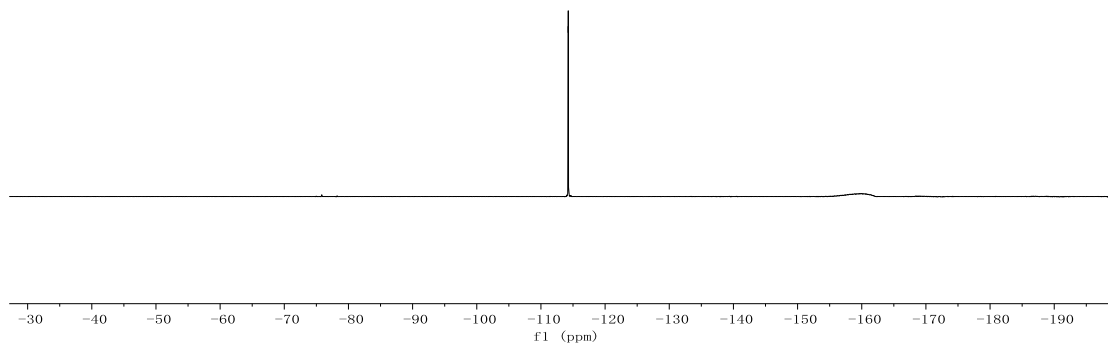

HRMS (ESI)  $m/z$  Calcd for  $\text{C}_{19}\text{H}_{11}\text{FNO}$   $[\text{M}+\text{Na}]^+$  310.0639, found 310.0640.

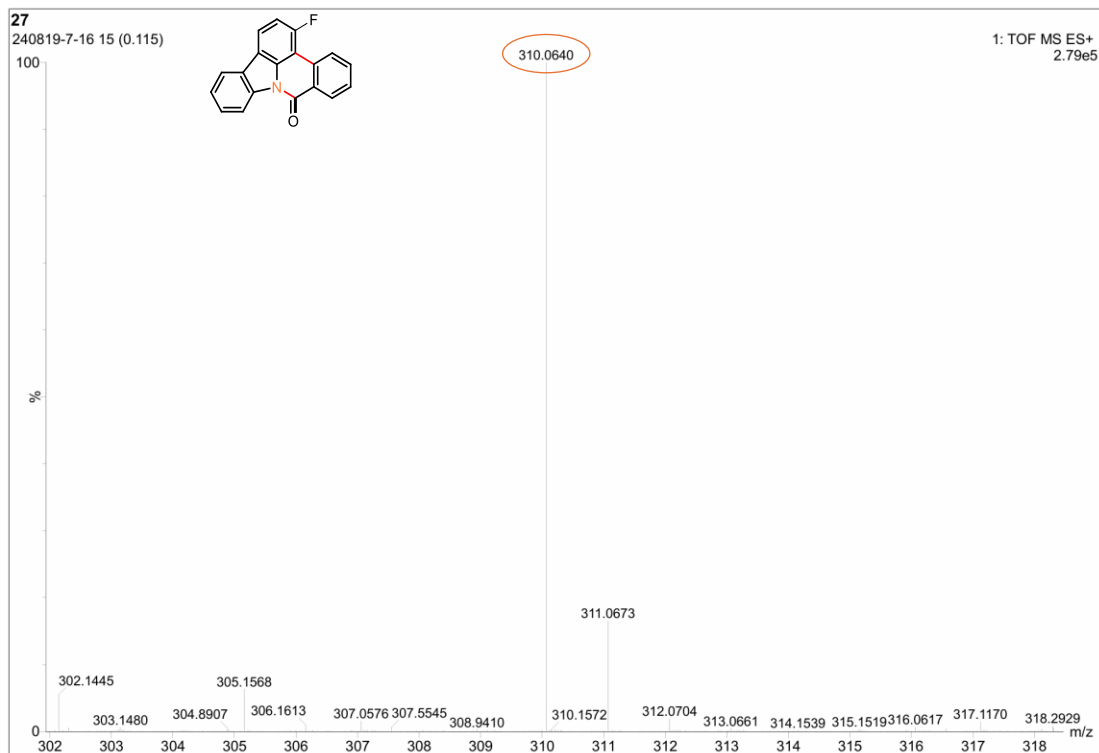

<sup>1</sup>H NMR of **4** (400 MHz, CDCl<sub>3</sub>)

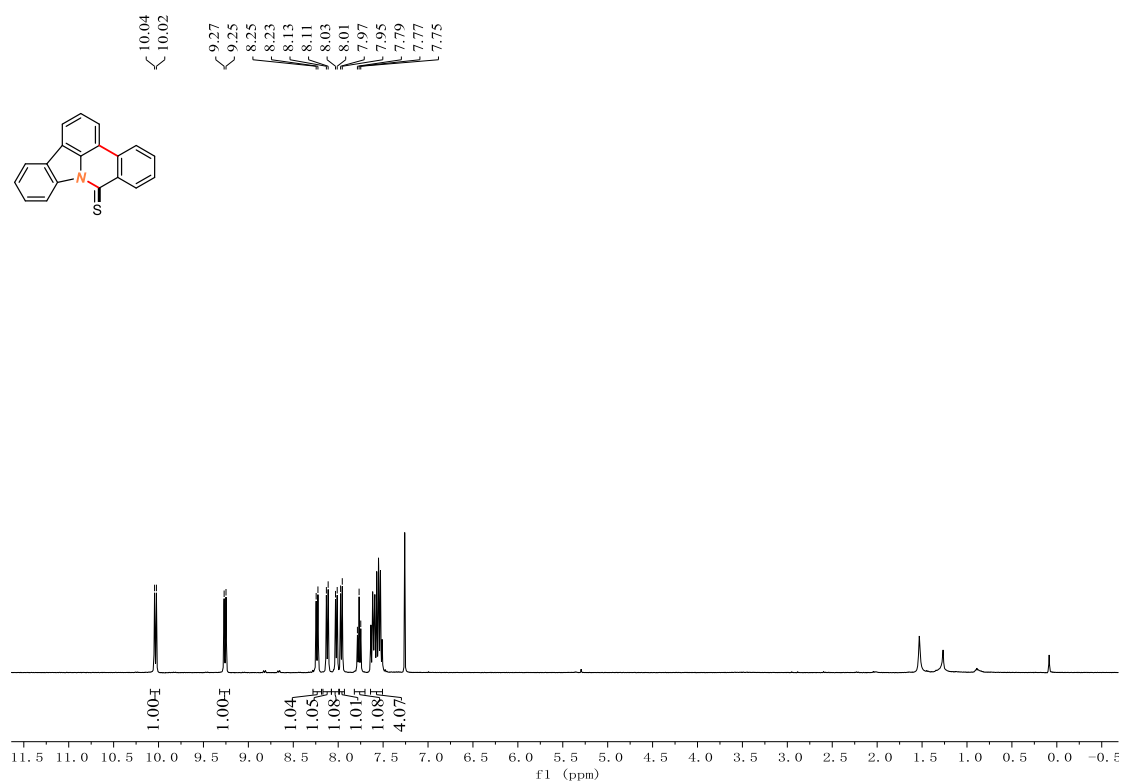

<sup>13</sup>C NMR of **4** (100 MHz, CDCl<sub>3</sub>)

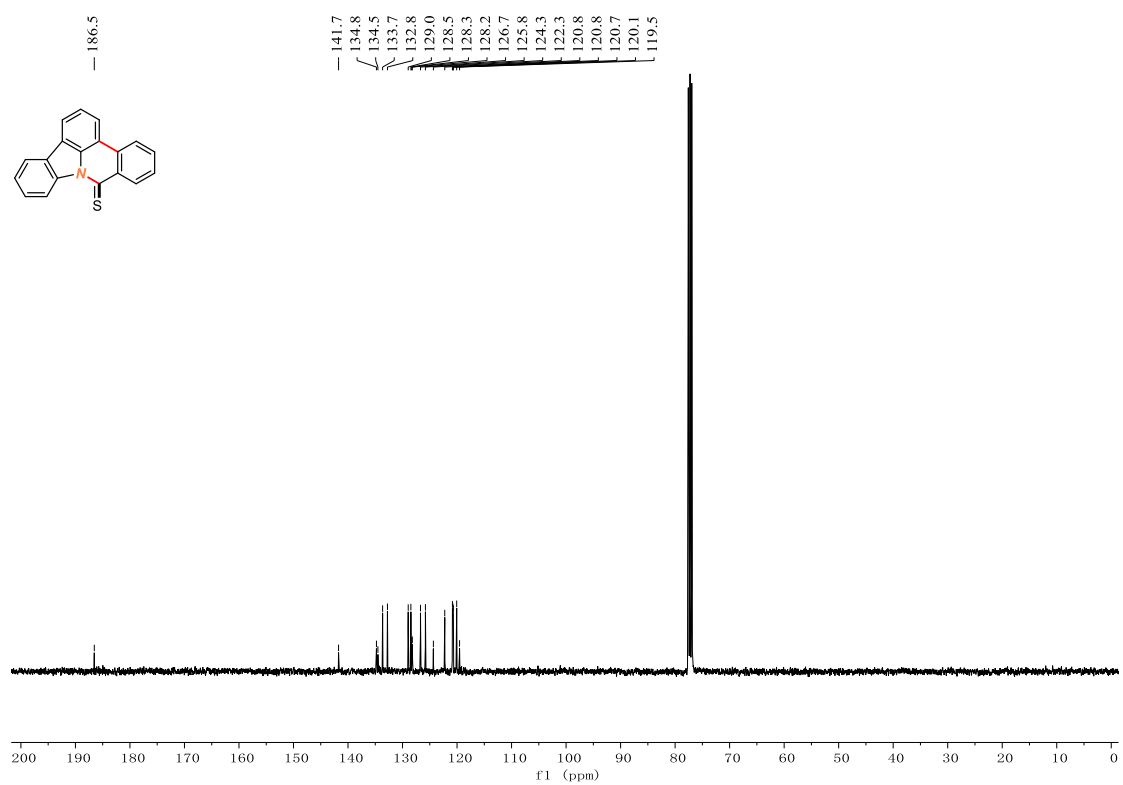

HRMS (ESI) m/z Calcd for C<sub>19</sub>H<sub>12</sub>NS [M+H]<sup>+</sup> 286.0685, found 286.0686.

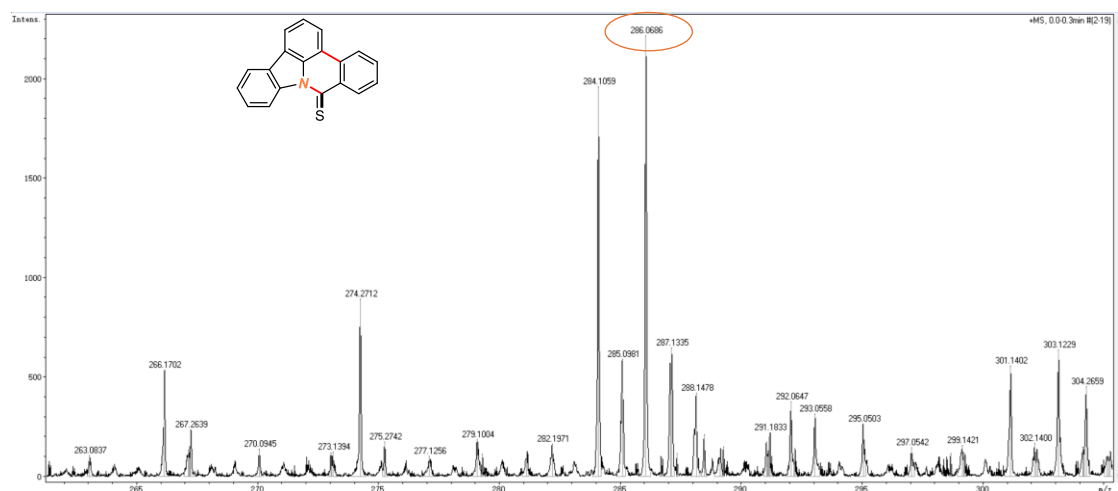

<sup>1</sup>H NMR of **5** (400 MHz, CDCl<sub>3</sub>)

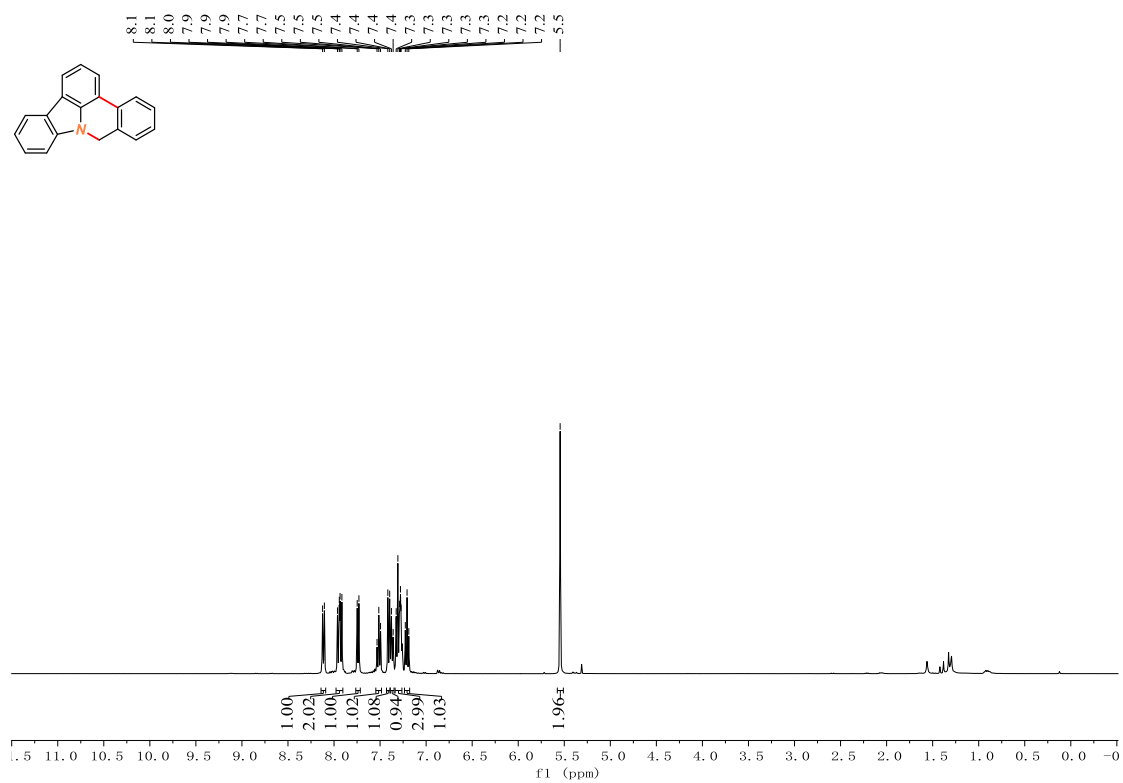

$^{13}\text{C}$  NMR of **5** (100 MHz,  $\text{CDCl}_3$ )

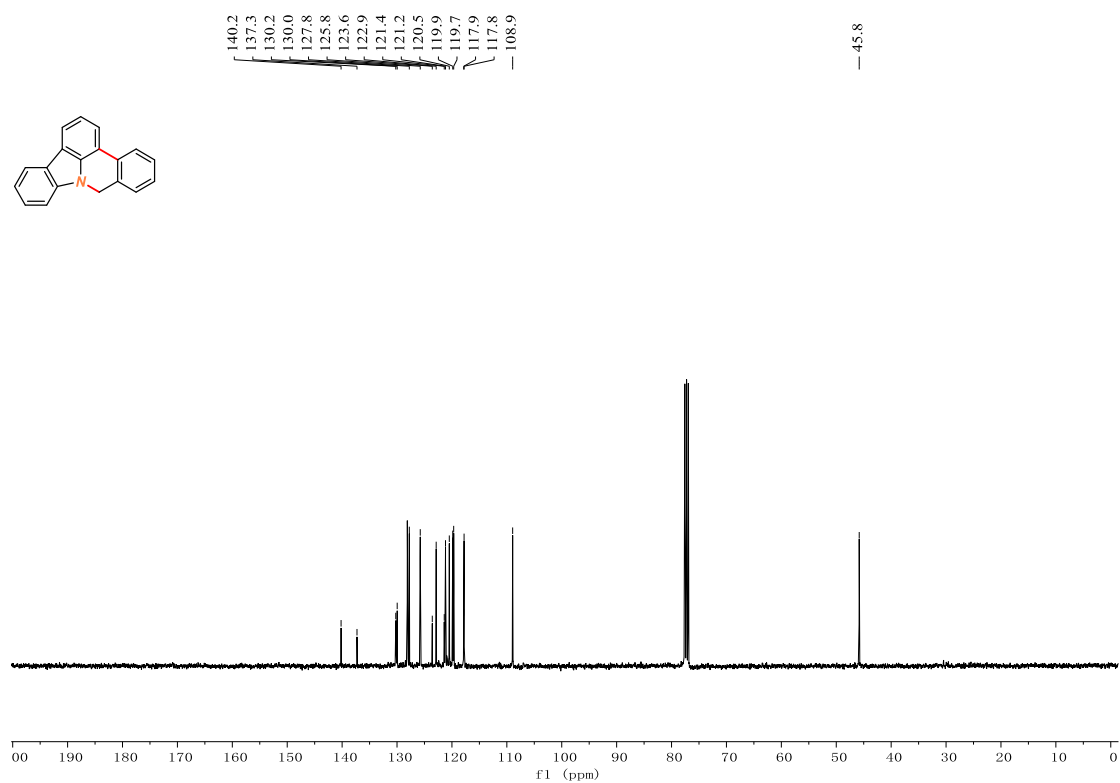

HRMS (ESI)  $m/z$  Calcd for  $\text{C}_{19}\text{H}_{14}\text{N}$   $[\text{M}+\text{Na}]^+$  278.0940, found 278.0925.

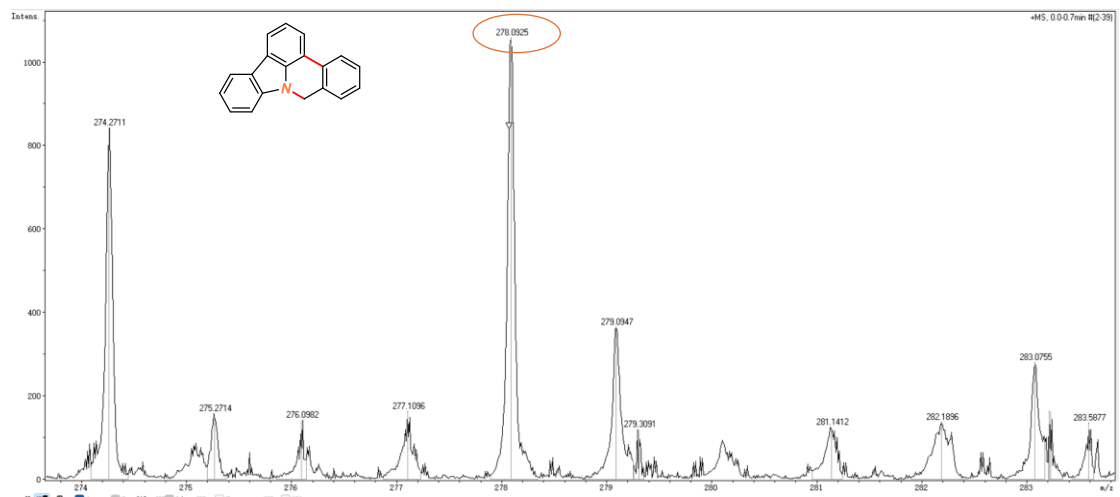



<sup>1</sup>H NMR of 7 (400 MHz, CDCl<sub>3</sub>)

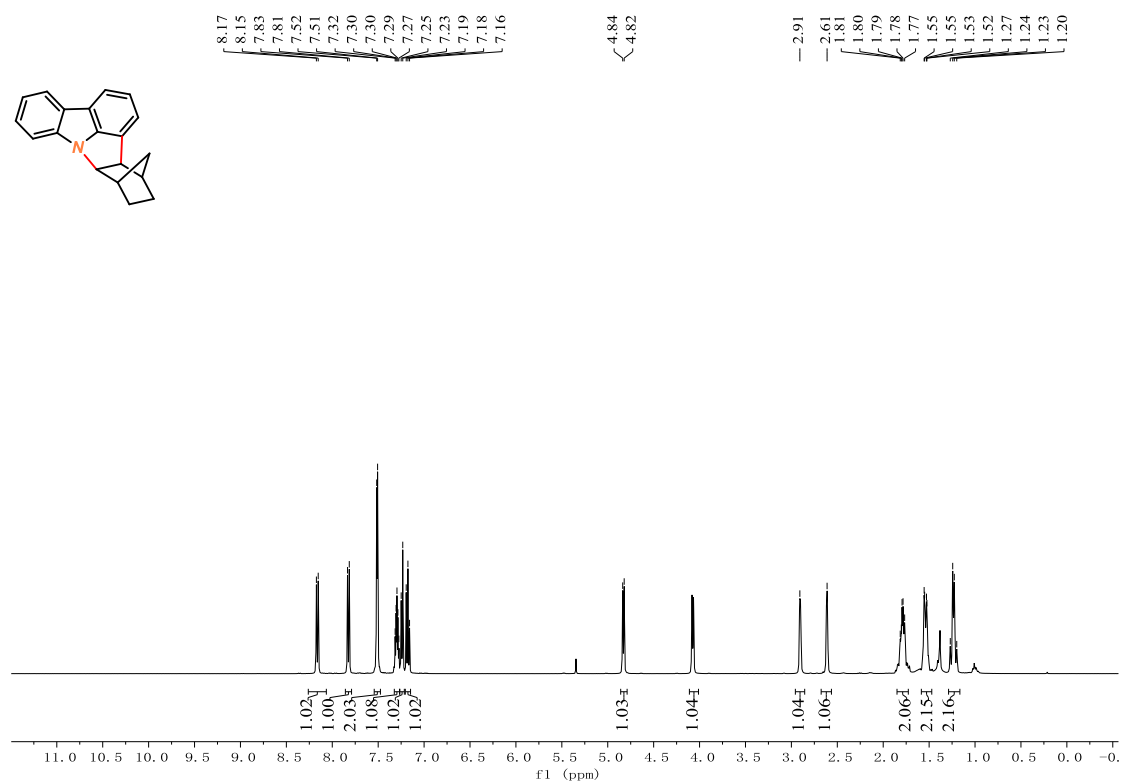

<sup>13</sup>C NMR of 7 (100 MHz, CDCl<sub>3</sub>)

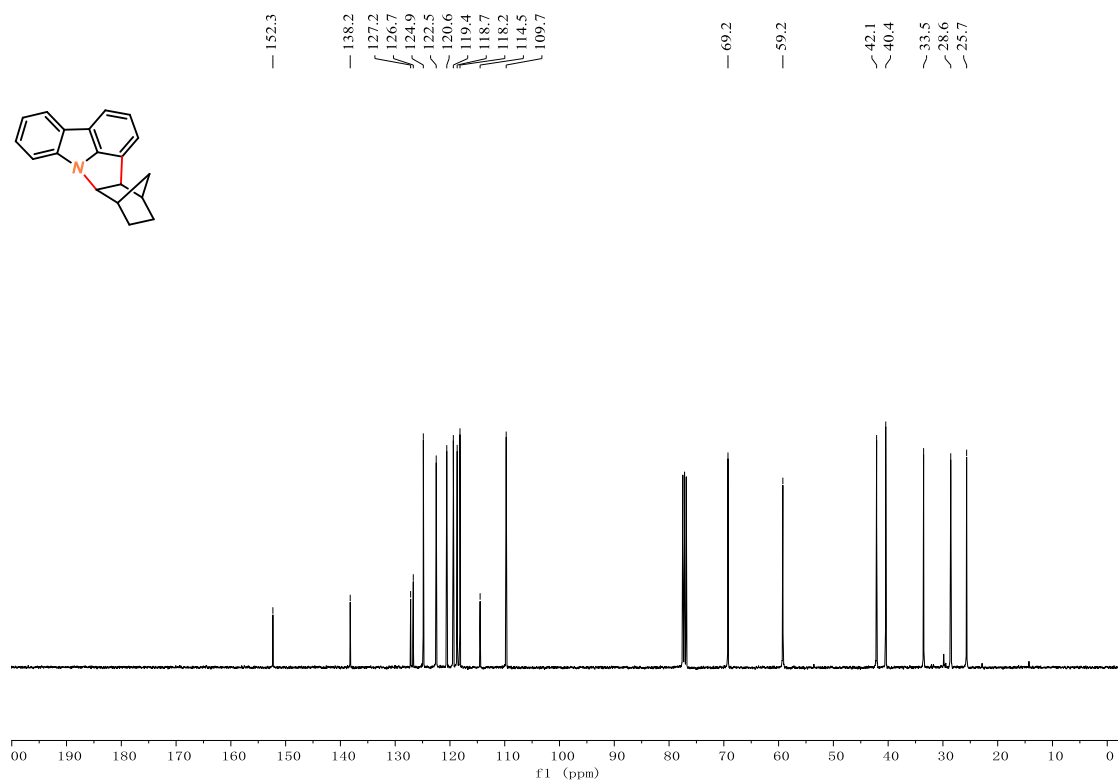

## 9. References

- [1] M. Holzapfel, C. Lambert, *J. Phys. Chem. C.*, **2008**, *112*, 1227.
- [2] N. Miyaura, K. Yamada, A. Suzuki, *Tetrahedron Lett.*, **1979**, *20*, 3437.
- [3] L. Qiao, K. Zhang, H. J. Li, P. Lu, Y. G. Wang, *Tetrahedron Lett.*, **2022**, *91*, 153648.
- [4] P. Annamalai, H. C. Hisao, S. Raju, Y. H. Fu, P. L. Chen, J. C. Horng, Y. H. Li, S. C. Chuang, *Org. Lett.*, **2019**, *21*, 1182.
